# Supplementary material for: Dual inhibition of neutrophil superoxide generation and elastase release via JNK, ERK and FAK pathways: blockade by methoxy-chalcone derivatives
Source: Royal Society of Chemistry journal article supplement (doi:10.1039/d6ra01300g), 2026-05-11

## Supplementary Information

### Dual Inhibition of Neutrophil Superoxide Generation and Elastase Release via JNK, ERK and FAK Pathway: Blockade by Methoxy-Chalcone Derivatives

**Dalia S. El-Gamil**<sup>1</sup>, **Mennatallah A. Hammam**<sup>2,3</sup>, **Michael Emad**<sup>3</sup>, **Donia E. Hafez**<sup>3</sup>, **Mohamed El-Shazly**<sup>4</sup>, **Yu-Cheng Chen**<sup>5</sup>, **Yi-Hsuan Wang**<sup>6</sup>, **Po-Hsiung Kung**<sup>5,6</sup>, **Michal Korinek**<sup>7</sup>, **Tsong-Long Hwang**<sup>5,6,8,9,\*</sup>, **Mohammad Abdel-Halim**<sup>3,\*</sup>

<sup>1</sup> Department of Chemistry, Faculty of Pharmacy, Ahram Canadian University, Cairo, 12451, Egypt

<sup>2</sup> School of Life and Medical Sciences, University of Hertfordshire Hosted by Global Academic Foundation, New Administrative Capital, Cairo 11865, Egypt

<sup>3</sup> Department of Pharmaceutical Chemistry, Faculty of Pharmacy and Biotechnology, German University in Cairo, Cairo 11835, Egypt

<sup>4</sup> Department of Pharmacognosy, Faculty of Pharmacy, Ain-Shams University, Cairo, 11566, Egypt

<sup>5</sup> Center for Drug Research and Development, Graduate Institute of Healthy Industry Technology, College of Human Ecology, Chang Gung University of Science and Technology, Taoyuan 333, Taiwan

<sup>6</sup> Graduate Institute of Natural Products, College of Medicine, Chang Gung University, Taoyuan 333, Taiwan

<sup>7</sup> Graduate Institute of Natural Products, College of Pharmacy, Kaohsiung Medical University, Kaohsiung 807, Taiwan

<sup>8</sup> Department of Anesthesiology, Chang Gung Memorial Hospital, Taoyuan 333, Taiwan

<sup>9</sup> Department of Chemical Engineering, Ming Chi University of Technology, New Taipei City 243, Taiwan

\*Corresponding authors

Mohammad Abdel-Halim (mohammad.abdel-halim@guc.edu.eg) and Tsong-Long Hwang (htl@mail.cgust.edu.tw)

## Table of Contents

| Title                                                                                                  | Page        |
|--------------------------------------------------------------------------------------------------------|-------------|
| <b><sup>1</sup>H NMR, <sup>13</sup>C NMR, and mass spectral data of the target compounds (1-28)</b>    | <b>7-62</b> |
| <b>Figure S1.</b> <sup>1</sup> H NMR (400 MHz, CDCl <sub>3</sub> ) spectrum of compound 1.             | <b>7</b>    |
| <b>Figure S2.</b> <sup>13</sup> C NMR (101 MHz, CDCl <sub>3</sub> ) spectrum of compound 1.            | <b>7</b>    |
| <b>Figure S3.</b> Mass spectrum of compound 1.                                                         | <b>8</b>    |
| <b>Figure S4.</b> <sup>1</sup> H NMR (400 MHz, CDCl <sub>3</sub> ) spectrum of compound 2.             | <b>9</b>    |
| <b>Figure S5.</b> <sup>13</sup> C NMR (101 MHz, CDCl <sub>3</sub> ) spectrum of compound 2.            | <b>9</b>    |
| <b>Figure S6.</b> Mass spectrum of compound 2.                                                         | <b>10</b>   |
| <b>Figure S7.</b> <sup>1</sup> H NMR (400 MHz, CDCl <sub>3</sub> ) spectrum of compound 3.             | <b>11</b>   |
| <b>Figure S8.</b> <sup>13</sup> C NMR (101 MHz, CDCl <sub>3</sub> ) spectrum of compound 3.            | <b>11</b>   |
| <b>Figure S9.</b> Mass spectrum of compound 3.                                                         | <b>12</b>   |
| <b>Figure S10.</b> <sup>1</sup> H NMR (400 MHz, DMSO- <i>d</i> <sub>6</sub> ) spectrum of compound 4.  | <b>13</b>   |
| <b>Figure S11.</b> <sup>13</sup> C NMR (101 MHz, DMSO- <i>d</i> <sub>6</sub> ) spectrum of compound 4. | <b>13</b>   |
| <b>Figure S12.</b> Mass spectrum of compound 4.                                                        | <b>14</b>   |
| <b>Figure S13.</b> <sup>1</sup> H NMR (400 MHz, CDCl <sub>3</sub> ) spectrum of compound 5.            | <b>15</b>   |
| <b>Figure S14.</b> <sup>13</sup> C NMR (101 MHz, CDCl <sub>3</sub> ) spectrum of compound 5.           | <b>15</b>   |
| <b>Figure S15.</b> Mass spectrum of compound 5.                                                        | <b>16</b>   |
| <b>Figure S16.</b> <sup>1</sup> H NMR (400 MHz, CDCl <sub>3</sub> ) spectrum of compound 6.            | <b>17</b>   |
| <b>Figure S17.</b> <sup>13</sup> C NMR (101 MHz, CDCl <sub>3</sub> ) spectrum of compound 6.           | <b>17</b>   |
| <b>Figure S18.</b> Mass spectrum of compound 6.                                                        | <b>18</b>   |
| <b>Figure S19.</b> <sup>1</sup> H NMR (400 MHz, CDCl <sub>3</sub> ) spectrum of compound 7.            | <b>19</b>   |
| <b>Figure S20.</b> <sup>13</sup> C NMR (101 MHz, CDCl <sub>3</sub> ) spectrum of compound 7.           | <b>19</b>   |
| <b>Figure S21.</b> Mass spectrum of compound 7.                                                        | <b>20</b>   |

|                                                                                                       |           |
|-------------------------------------------------------------------------------------------------------|-----------|
| <b>Figure S22.</b> $^1\text{H}$ NMR (400 MHz, $\text{CDCl}_3$ ) spectrum of compound <b>8</b> .       | <b>21</b> |
| <b>Figure S23.</b> $^{13}\text{C}$ NMR (101 MHz, $\text{CDCl}_3$ ) spectrum of compound <b>8</b> .    | <b>21</b> |
| <b>Figure S24.</b> Mass spectrum of compound <b>8</b> .                                               | <b>22</b> |
| <b>Figure S25.</b> $^1\text{H}$ NMR (400 MHz, $\text{CDCl}_3$ ) spectrum of compound <b>9</b> .       | <b>23</b> |
| <b>Figure S26.</b> $^{13}\text{C}$ NMR (101 MHz, $\text{CDCl}_3$ ) spectrum of compound <b>9</b> .    | <b>23</b> |
| <b>Figure S27.</b> Mass spectrum of compound <b>9</b> .                                               | <b>24</b> |
| <b>Figure S28.</b> $^1\text{H}$ NMR (400 MHz, $\text{CDCl}_3$ ) spectrum of compound <b>10</b> .      | <b>25</b> |
| <b>Figure S29.</b> $^{13}\text{C}$ NMR (101 MHz, $\text{CDCl}_3$ ) spectrum of compound <b>10</b> .   | <b>25</b> |
| <b>Figure S30.</b> Mass spectrum of compound <b>10</b> .                                              | <b>26</b> |
| <b>Figure S31.</b> $^1\text{H}$ NMR (400 MHz, $\text{DMSO}-d_6$ ) spectrum of compound <b>11</b> .    | <b>27</b> |
| <b>Figure S32.</b> $^{13}\text{C}$ NMR (101 MHz, $\text{DMSO}-d_6$ ) spectrum of compound <b>11</b> . | <b>27</b> |
| <b>Figure S33.</b> Mass spectrum of compound <b>11</b> .                                              | <b>28</b> |
| <b>Figure S34.</b> $^1\text{H}$ NMR (400 MHz, $\text{DMSO}-d_6$ ) spectrum of compound <b>12</b> .    | <b>29</b> |
| <b>Figure S35.</b> $^{13}\text{C}$ NMR (101 MHz, $\text{DMSO}-d_6$ ) spectrum of compound <b>12</b> . | <b>29</b> |
| <b>Figure S36.</b> Mass spectrum of compound <b>12</b> .                                              | <b>30</b> |
| <b>Figure S37.</b> $^1\text{H}$ NMR (400 MHz, $\text{CDCl}_3$ ) spectrum of compound <b>13</b> .      | <b>31</b> |
| <b>Figure S38.</b> $^{13}\text{C}$ NMR (101 MHz, $\text{CDCl}_3$ ) spectrum of compound <b>13</b> .   | <b>31</b> |
| <b>Figure S39.</b> Mass spectrum of compound <b>13</b> .                                              | <b>32</b> |
| <b>Figure S40.</b> $^1\text{H}$ NMR (400 MHz, $\text{CDCl}_3$ ) spectrum of compound <b>14</b> .      | <b>33</b> |
| <b>Figure S41.</b> $^{13}\text{C}$ NMR (101 MHz, $\text{CDCl}_3$ ) spectrum of compound <b>14</b> .   | <b>33</b> |
| <b>Figure S42.</b> Mass spectrum of compound <b>14</b> .                                              | <b>34</b> |
| <b>Figure S43.</b> $^1\text{H}$ NMR (400 MHz, $\text{CDCl}_3$ ) spectrum of compound <b>15</b> .      | <b>35</b> |
| <b>Figure S44.</b> $^{13}\text{C}$ NMR (101 MHz, $\text{CDCl}_3$ ) spectrum of compound <b>15</b> .   | <b>35</b> |
| <b>Figure S45.</b> Mass spectrum of compound <b>15</b> .                                              | <b>36</b> |

|                                                                                                     |           |
|-----------------------------------------------------------------------------------------------------|-----------|
| <b>Figure S46.</b> $^1\text{H}$ NMR (400 MHz, $\text{CDCl}_3$ ) spectrum of compound <b>16</b> .    | <b>37</b> |
| <b>Figure S47.</b> $^{13}\text{C}$ NMR (101 MHz, $\text{CDCl}_3$ ) spectrum of compound <b>16</b> . | <b>37</b> |
| <b>Figure S48.</b> Mass spectrum of compound <b>16</b> .                                            | <b>38</b> |
| <b>Figure S49.</b> $^1\text{H}$ NMR (400 MHz, $\text{CDCl}_3$ ) spectrum of compound <b>17</b> .    | <b>39</b> |
| <b>Figure S50.</b> $^{13}\text{C}$ NMR (101 MHz, $\text{CDCl}_3$ ) spectrum of compound <b>17</b> . | <b>39</b> |
| <b>Figure S51.</b> Mass spectrum of compound <b>17</b> .                                            | <b>40</b> |
| <b>Figure S52.</b> $^1\text{H}$ NMR (400 MHz, $\text{CDCl}_3$ ) spectrum of compound <b>18</b> .    | <b>41</b> |
| <b>Figure S53.</b> $^{13}\text{C}$ NMR (101 MHz, $\text{CDCl}_3$ ) spectrum of compound <b>18</b> . | <b>41</b> |
| <b>Figure S54.</b> Mass spectrum of compound <b>18</b> .                                            | <b>42</b> |
| <b>Figure S55.</b> $^1\text{H}$ NMR (400 MHz, $\text{CDCl}_3$ ) spectrum of compound <b>19</b> .    | <b>43</b> |
| <b>Figure S56.</b> $^{13}\text{C}$ NMR (101 MHz, $\text{CDCl}_3$ ) spectrum of compound <b>19</b> . | <b>43</b> |
| <b>Figure S57.</b> Mass spectrum of compound <b>19</b> .                                            | <b>44</b> |
| <b>Figure S58.</b> $^1\text{H}$ NMR (400 MHz, $\text{CDCl}_3$ ) spectrum of compound <b>20</b> .    | <b>45</b> |
| <b>Figure S59.</b> $^{13}\text{C}$ NMR (101 MHz, $\text{CDCl}_3$ ) spectrum of compound <b>20</b> . | <b>45</b> |
| <b>Figure S60.</b> Mass spectrum of compound <b>20</b> .                                            | <b>46</b> |
| <b>Figure S61.</b> $^1\text{H}$ NMR (400 MHz, $\text{CDCl}_3$ ) spectrum of compound <b>21</b> .    | <b>47</b> |
| <b>Figure S62.</b> $^{13}\text{C}$ NMR (101 MHz, $\text{CDCl}_3$ ) spectrum of compound <b>21</b> . | <b>47</b> |
| <b>Figure S63.</b> Mass spectrum of compound <b>21</b> .                                            | <b>48</b> |
| <b>Figure S64.</b> $^1\text{H}$ NMR (400 MHz, $\text{CDCl}_3$ ) spectrum of compound <b>22</b> .    | <b>49</b> |
| <b>Figure S65.</b> $^{13}\text{C}$ NMR (101 MHz, $\text{CDCl}_3$ ) spectrum of compound <b>22</b> . | <b>49</b> |
| <b>Figure S66.</b> Mass spectrum of compound <b>22</b> .                                            | <b>50</b> |
| <b>Figure S67.</b> $^1\text{H}$ NMR (400 MHz, $\text{CDCl}_3$ ) spectrum of compound <b>23</b> .    | <b>51</b> |
| <b>Figure S68.</b> $^{13}\text{C}$ NMR (101 MHz, $\text{CDCl}_3$ ) spectrum of compound <b>23</b> . | <b>51</b> |
| <b>Figure S69.</b> Mass spectrum of compound <b>23</b> .                                            | <b>52</b> |

|                                                                                                       |              |
|-------------------------------------------------------------------------------------------------------|--------------|
| <b>Figure S70.</b> $^1\text{H}$ NMR (400 MHz, $\text{DMSO-}d_6$ ) spectrum of compound <b>24</b> .    | <b>53</b>    |
| <b>Figure S71.</b> $^{13}\text{C}$ NMR (101 MHz, $\text{DMSO-}d_6$ ) spectrum of compound <b>24</b> . | <b>53</b>    |
| <b>Figure S72.</b> Mass spectrum of compound <b>24</b> .                                              | <b>54</b>    |
| <b>Figure S73.</b> $^1\text{H}$ NMR (400 MHz, $\text{CDCl}_3$ ) spectrum of compound <b>25</b> .      | <b>55</b>    |
| <b>Figure S74.</b> $^{13}\text{C}$ NMR (101 MHz, $\text{CDCl}_3$ ) spectrum of compound <b>25</b> .   | <b>55</b>    |
| <b>Figure S75.</b> Mass spectrum of compound <b>25</b> .                                              | <b>56</b>    |
| <b>Figure S76.</b> $^1\text{H}$ NMR (400 MHz, $\text{CDCl}_3$ ) spectrum of compound <b>26</b> .      | <b>57</b>    |
| <b>Figure S77.</b> $^{13}\text{C}$ NMR (101 MHz, $\text{CDCl}_3$ ) spectrum of compound <b>26</b> .   | <b>57</b>    |
| <b>Figure S78.</b> Mass spectrum of compound <b>26</b> .                                              | <b>58</b>    |
| <b>Figure S79.</b> $^1\text{H}$ NMR (400 MHz, $\text{CDCl}_3$ ) spectrum of compound <b>27</b> .      | <b>59</b>    |
| <b>Figure S80.</b> $^{13}\text{C}$ NMR (101 MHz, $\text{CDCl}_3$ ) spectrum of compound <b>27</b> .   | <b>59</b>    |
| <b>Figure S81.</b> Mass spectrum of compound <b>27</b> .                                              | <b>60</b>    |
| <b>Figure S82.</b> $^1\text{H}$ NMR (400 MHz, $\text{CDCl}_3$ ) spectrum of compound <b>28</b> .      | <b>61</b>    |
| <b>Figure S83.</b> $^{13}\text{C}$ NMR (101 MHz, $\text{CDCl}_3$ ) spectrum of compound <b>28</b> .   | <b>61</b>    |
| <b>Figure S84.</b> Mass spectrum of compound <b>28</b> .                                              | <b>62</b>    |
| <b>HPLC chromatograms</b>                                                                             | <b>63-69</b> |
| <b>Figure S85.</b> HPLC chromatogram of compound <b>1</b> .                                           | <b>63</b>    |
| <b>Figure S86.</b> HPLC chromatogram of compound <b>2</b> .                                           | <b>63</b>    |
| <b>Figure S87.</b> HPLC chromatogram of compound <b>3</b> .                                           | <b>63</b>    |
| <b>Figure S88.</b> HPLC chromatogram of compound <b>4</b> .                                           | <b>63</b>    |
| <b>Figure S89.</b> HPLC chromatogram of compound <b>5</b> .                                           | <b>64</b>    |
| <b>Figure S90.</b> HPLC chromatogram of compound <b>6</b> .                                           | <b>64</b>    |
| <b>Figure S91.</b> HPLC chromatogram of compound <b>7</b> .                                           | <b>64</b>    |
| <b>Figure S92.</b> HPLC chromatogram of compound <b>8</b> .                                           | <b>64</b>    |

|                                                               |           |
|---------------------------------------------------------------|-----------|
| <b>Figure S93.</b> HPLC chromatogram of compound <b>9</b> .   | <b>65</b> |
| <b>Figure S94.</b> HPLC chromatogram of compound <b>10</b> .  | <b>65</b> |
| <b>Figure S95.</b> HPLC chromatogram of compound <b>11</b> .  | <b>65</b> |
| <b>Figure S96.</b> HPLC chromatogram of compound <b>12</b> .  | <b>65</b> |
| <b>Figure S97.</b> HPLC chromatogram of compound <b>13</b> .  | <b>66</b> |
| <b>Figure S98.</b> HPLC chromatogram of compound <b>14</b> .  | <b>66</b> |
| <b>Figure S99.</b> HPLC chromatogram of compound <b>15</b> .  | <b>66</b> |
| <b>Figure S100.</b> HPLC chromatogram of compound <b>16</b> . | <b>66</b> |
| <b>Figure S101.</b> HPLC chromatogram of compound <b>17</b> . | <b>67</b> |
| <b>Figure S102.</b> HPLC chromatogram of compound <b>18</b> . | <b>67</b> |
| <b>Figure S103.</b> HPLC chromatogram of compound <b>19</b> . | <b>67</b> |
| <b>Figure S104.</b> HPLC chromatogram of compound <b>20</b> . | <b>67</b> |
| <b>Figure S105.</b> HPLC chromatogram of compound <b>21</b> . | <b>68</b> |
| <b>Figure S106.</b> HPLC chromatogram of compound <b>22</b> . | <b>68</b> |
| <b>Figure S107.</b> HPLC chromatogram of compound <b>23</b> . | <b>68</b> |
| <b>Figure S108.</b> HPLC chromatogram of compound <b>24</b> . | <b>68</b> |
| <b>Figure S109.</b> HPLC chromatogram of compound <b>25</b> . | <b>69</b> |
| <b>Figure S110.</b> HPLC chromatogram of compound <b>26</b> . | <b>69</b> |
| <b>Figure S111.</b> HPLC chromatogram of compound <b>27</b> . | <b>69</b> |
| <b>Figure S112.</b> HPLC chromatogram of compound <b>28</b> . | <b>69</b> |
| <b>Original images for Western blots in Figure 5.</b>         | <b>70</b> |
| <b>Original images for Western blots in Figure 6.</b>         | <b>74</b> |

**<sup>1</sup>H NMR, <sup>13</sup>C NMR, and mass spectral data of the target compounds (1-28)**

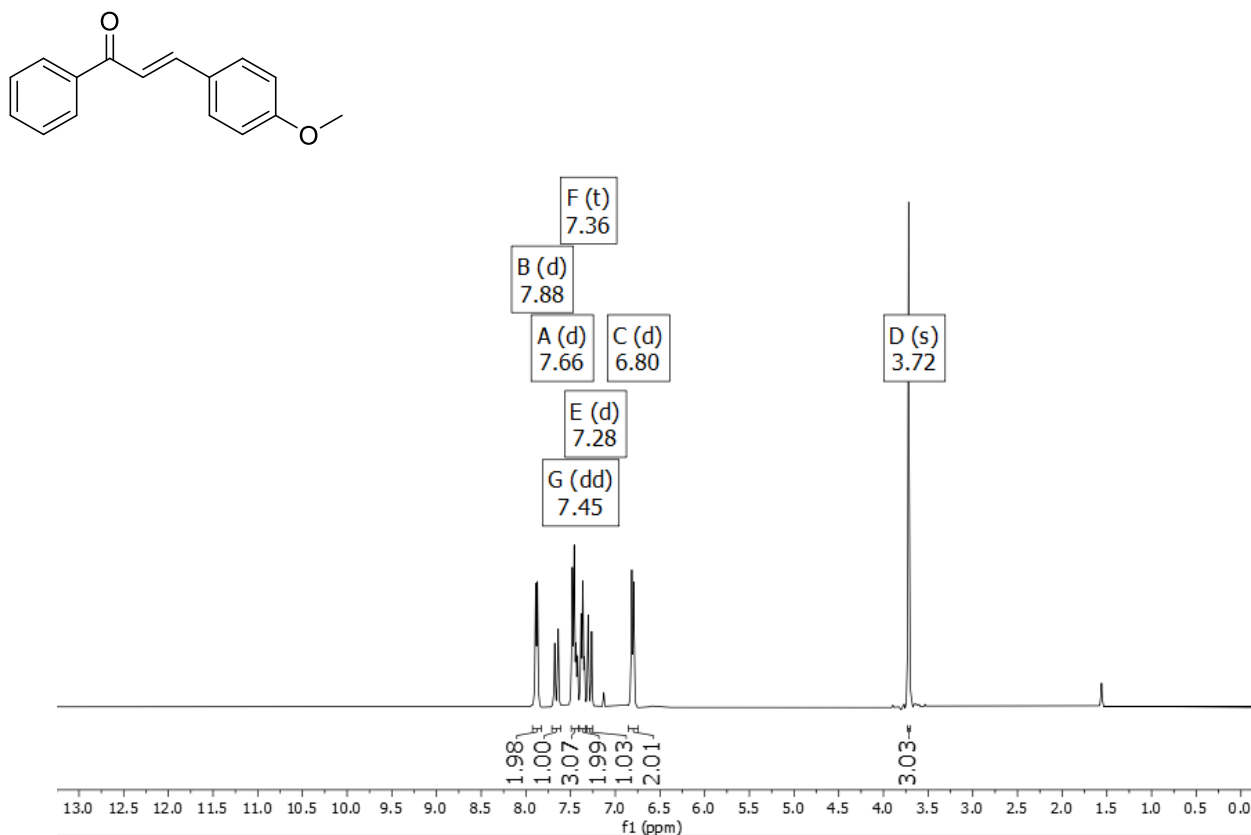

**Figure S1.** <sup>1</sup>H NMR (400 MHz, CDCl<sub>3</sub>) spectrum of compound 1.

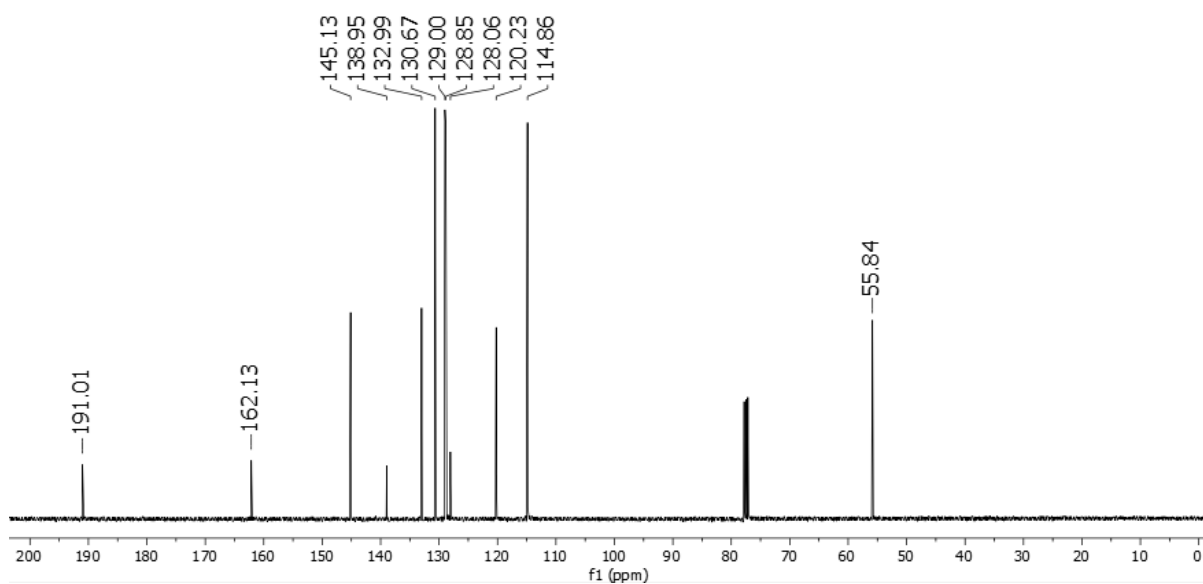

**Figure S2.** <sup>13</sup>C NMR (101 MHz, CDCl<sub>3</sub>) spectrum of compound 1.

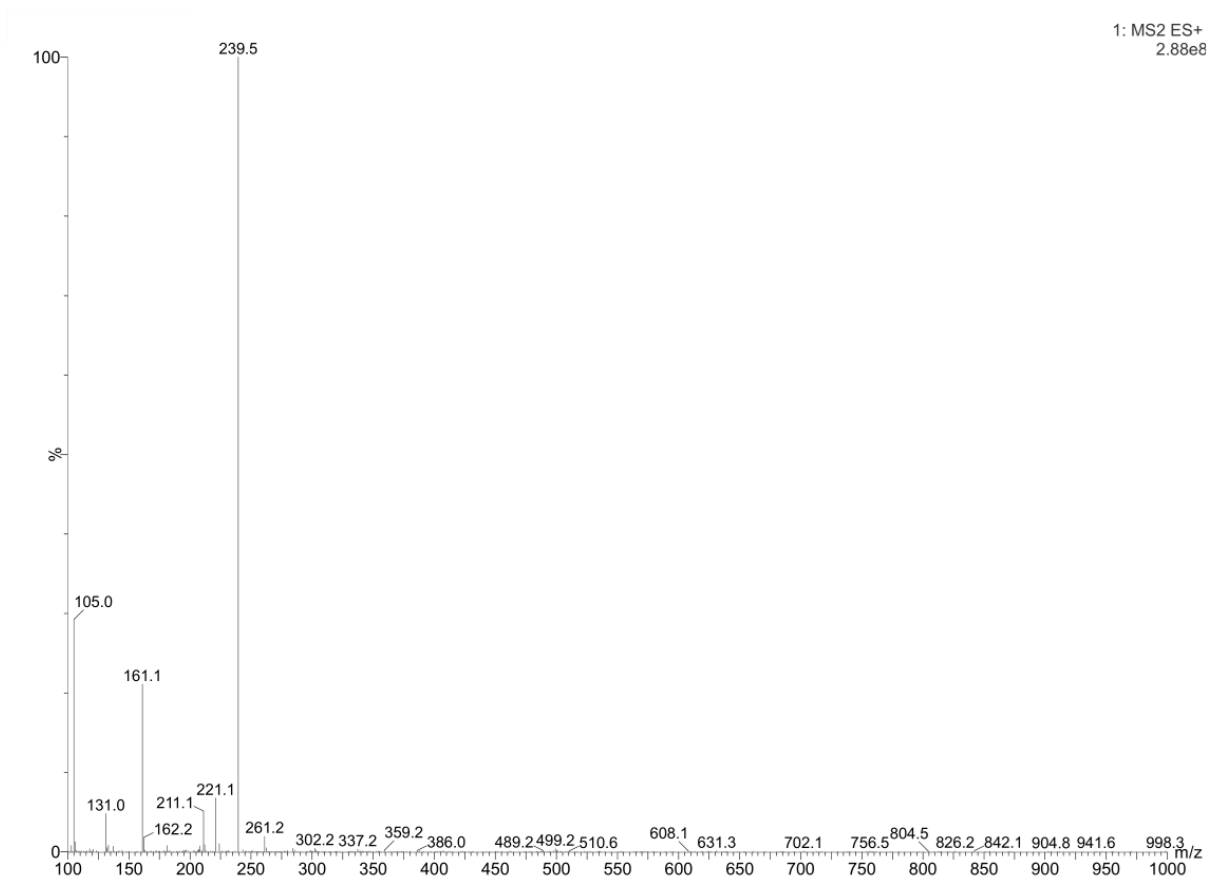

**Figure S3.** Mass spectrum of compound **1**.

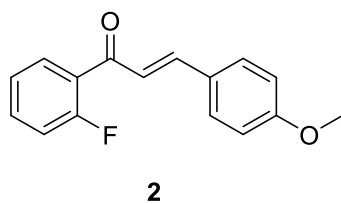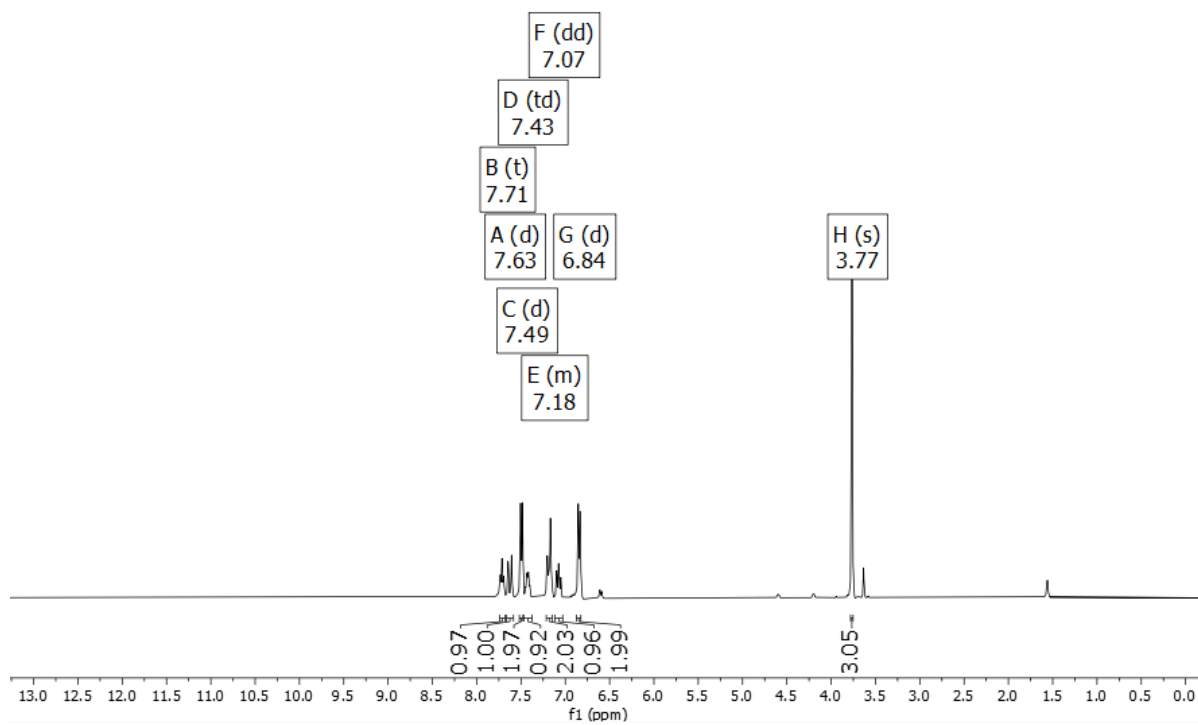

**Figure S4.**  $^1\text{H}$  NMR (400 MHz,  $\text{CDCl}_3$ ) spectrum of compound **2**.

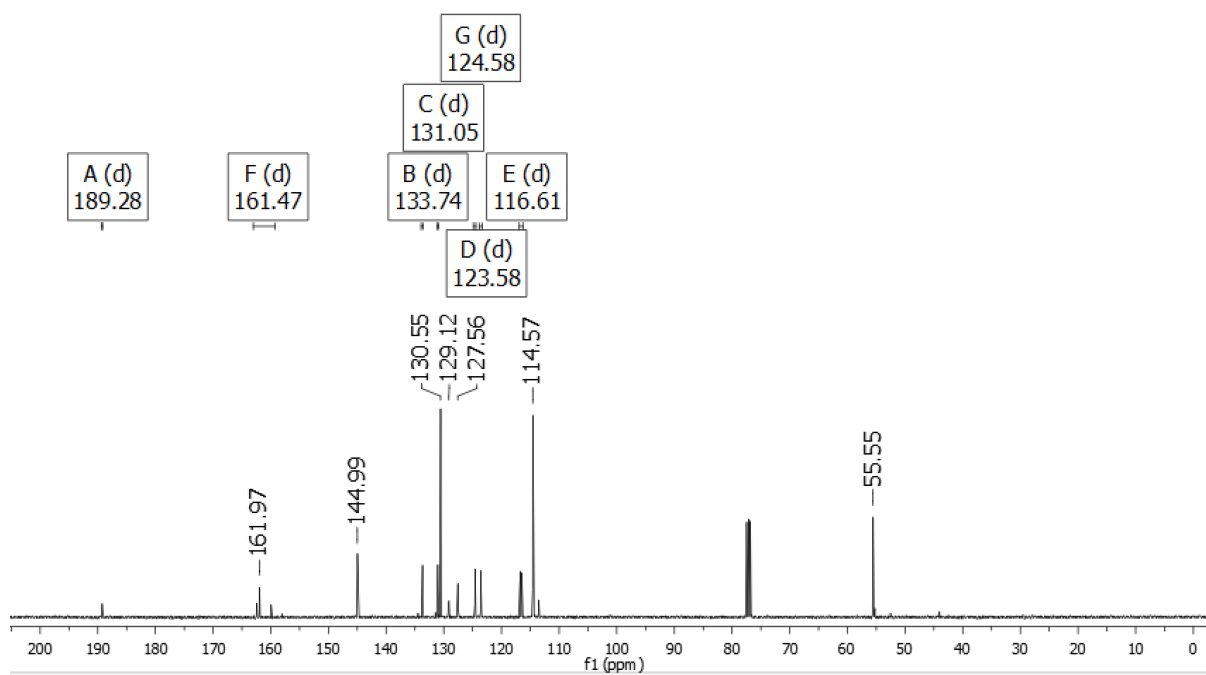

**Figure S5.**  $^{13}\text{C}$  NMR (101 MHz,  $\text{CDCl}_3$ ) spectrum of compound **2**.

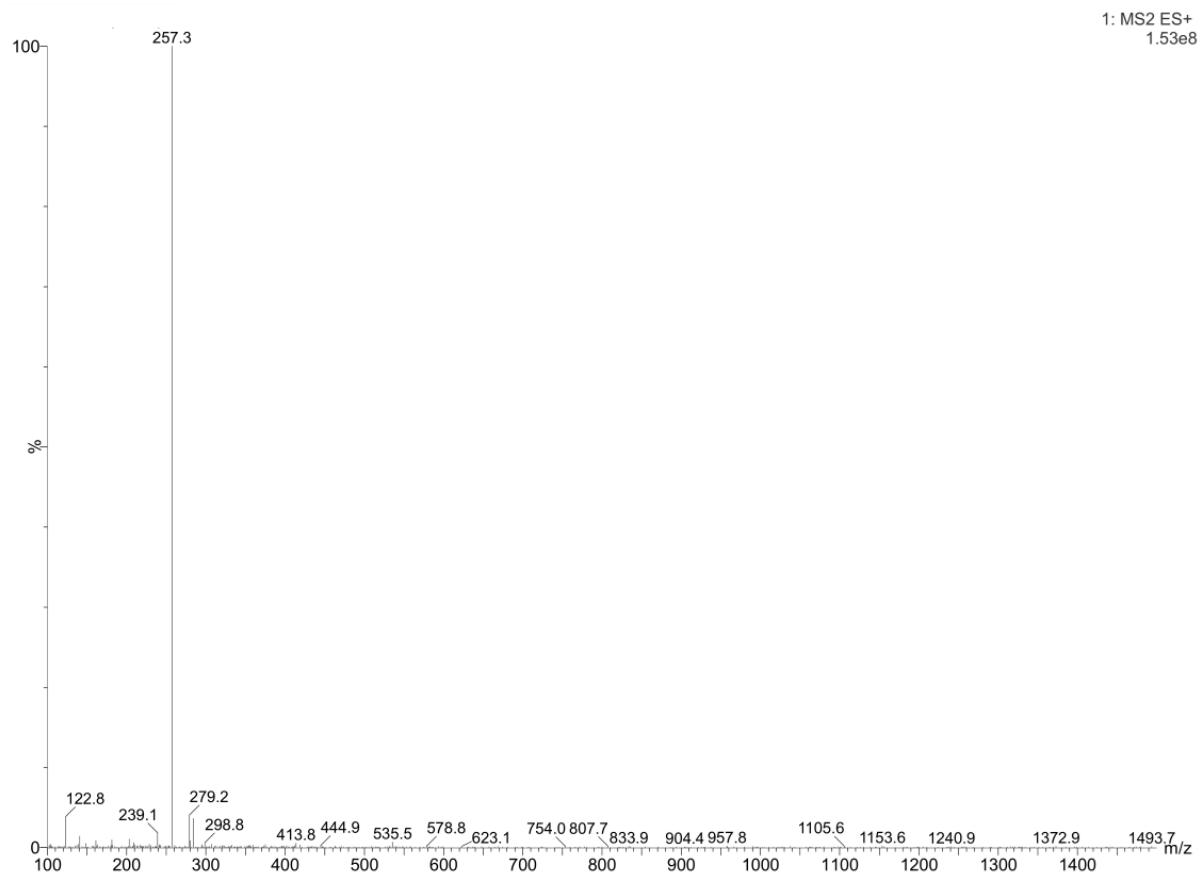

**Figure S6.** Mass spectrum of compound **2**.

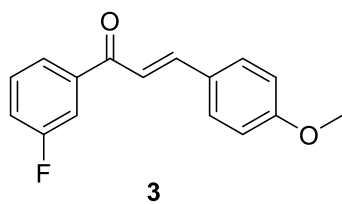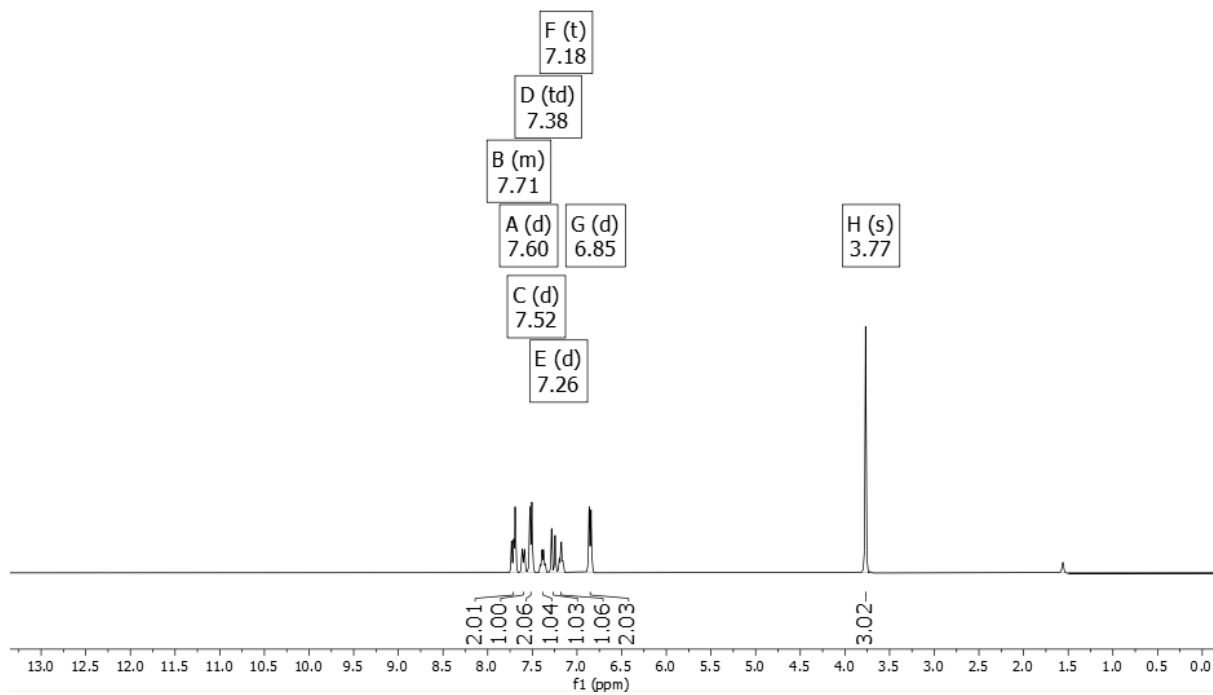

**Figure S7.**  $^1\text{H}$  NMR (400 MHz,  $\text{CDCl}_3$ ) spectrum of compound **3**.

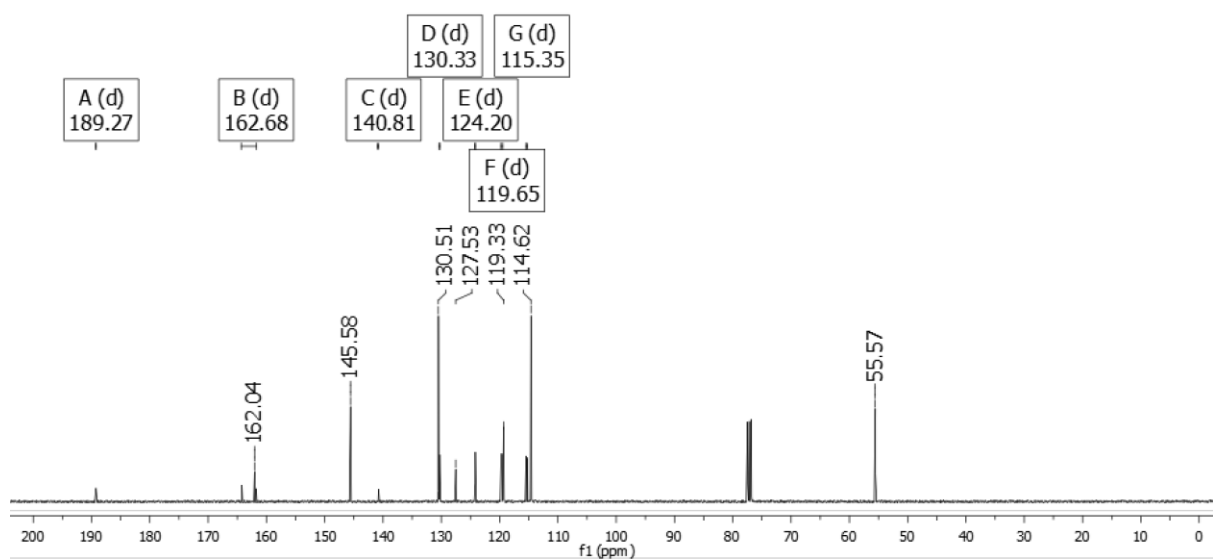

**Figure S8.**  $^{13}\text{C}$  NMR (101 MHz,  $\text{CDCl}_3$ ) spectrum of compound **3**.

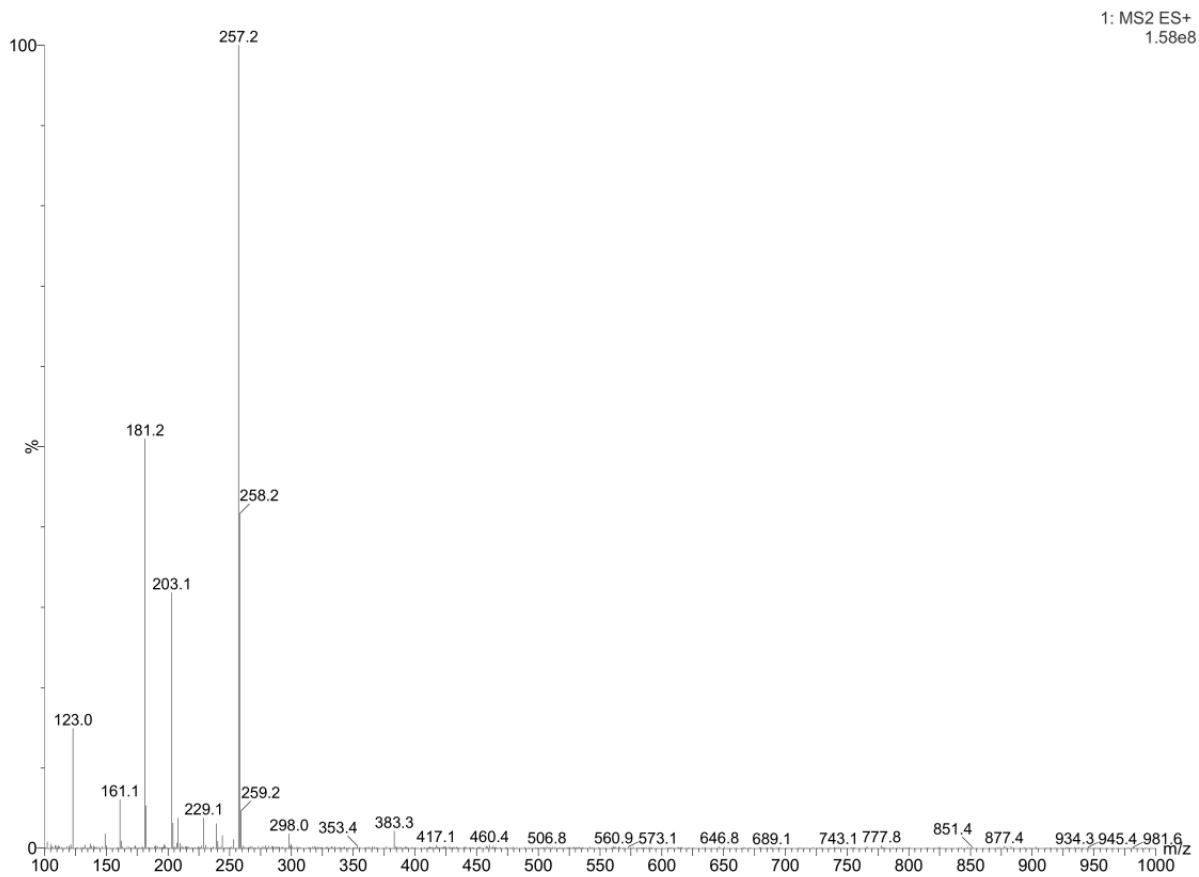

**Figure S9.** Mass spectrum of compound **3**.

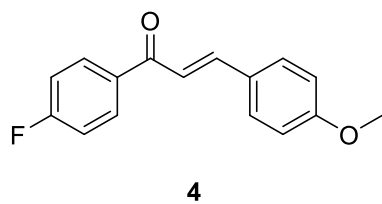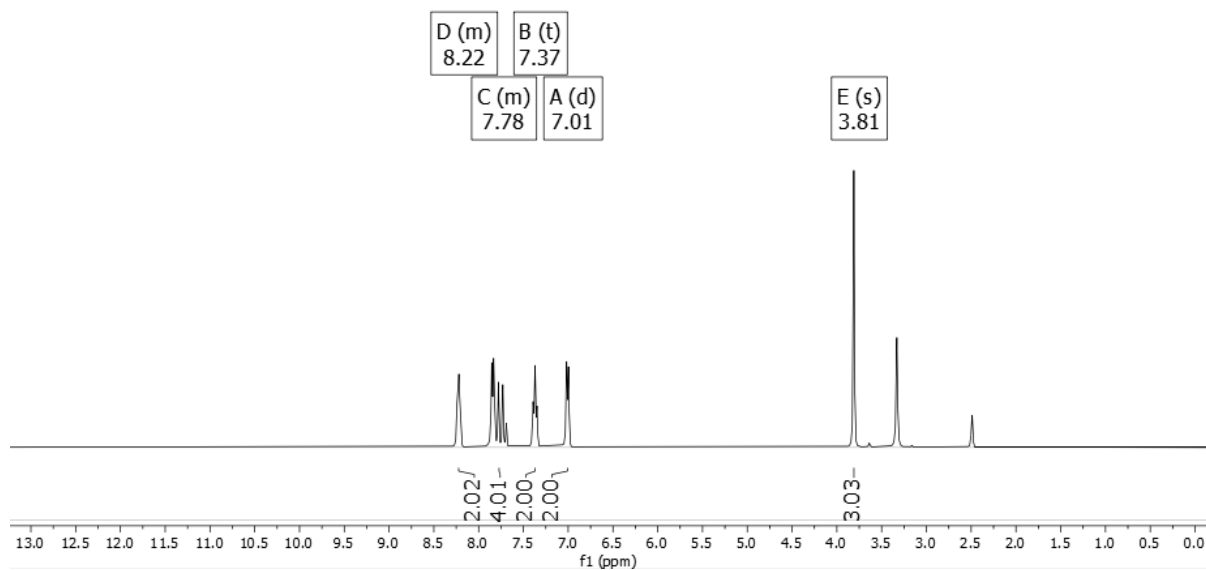

**Figure S10.**  $^1\text{H}$  NMR (400 MHz,  $\text{DMSO-}d_6$ ) spectrum of compound **4**.

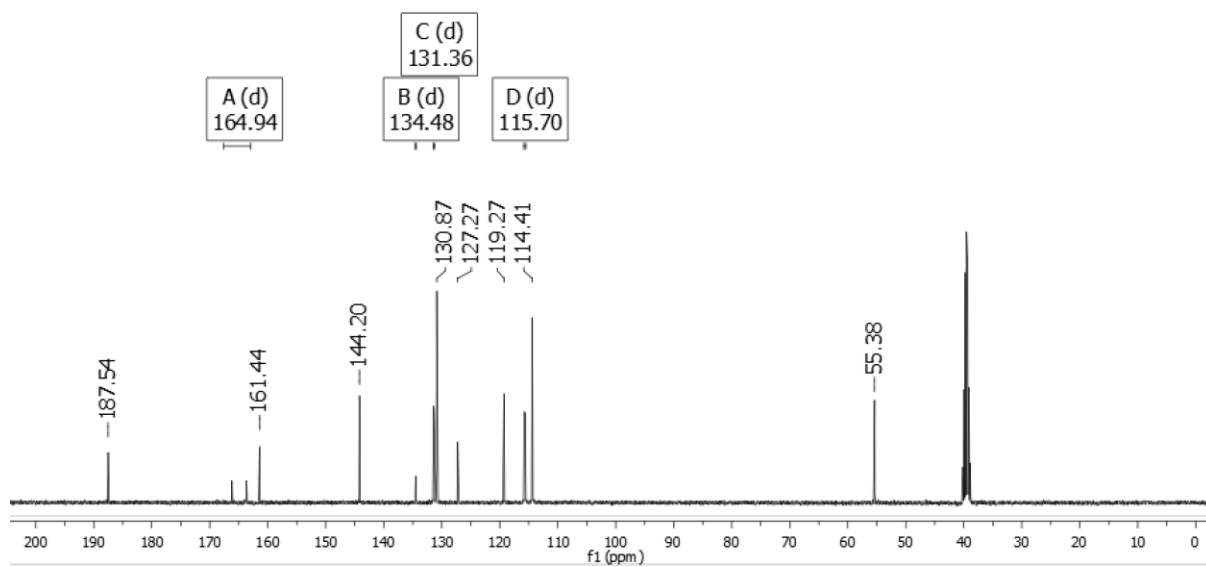

**Figure S11.**  $^{13}\text{C}$  NMR (101 MHz,  $\text{DMSO-}d_6$ ) spectrum of compound **4**.

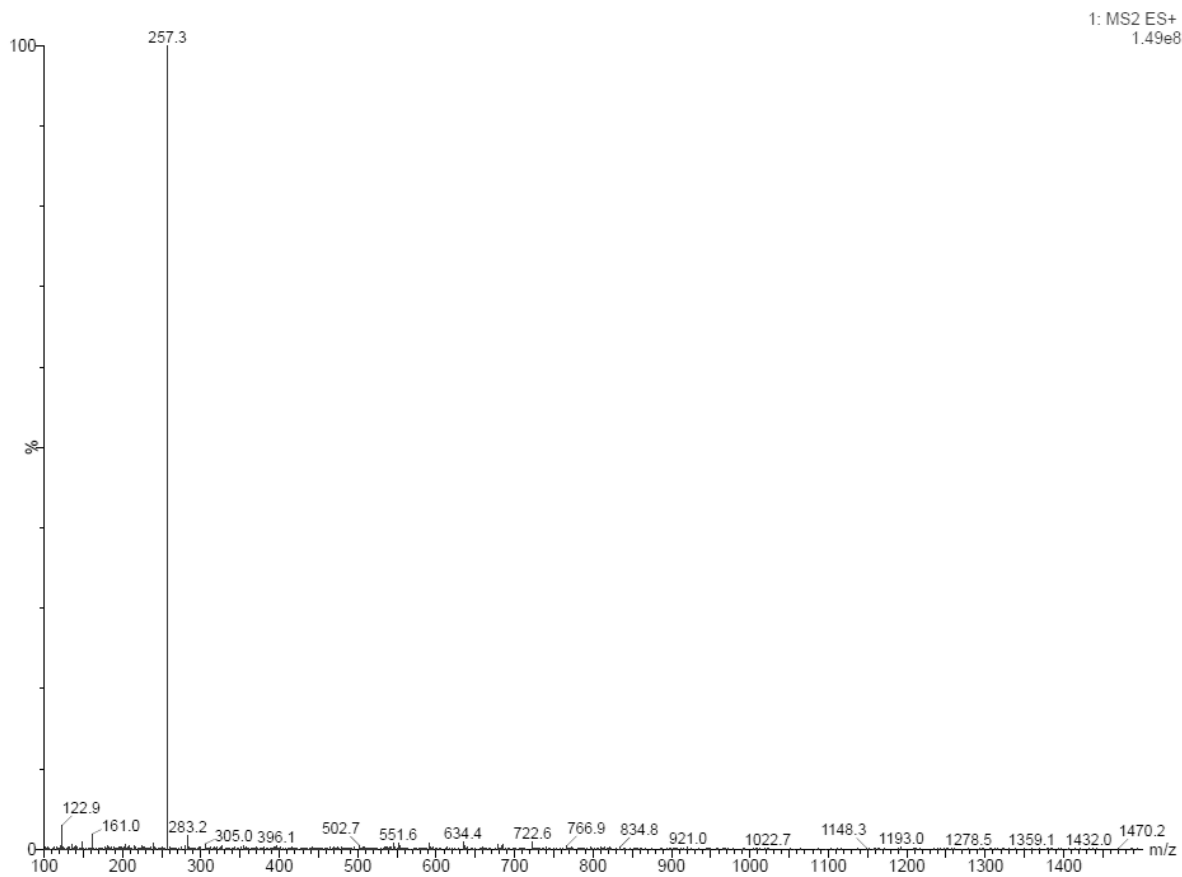

**Figure S12.** Mass spectrum of compound 4.

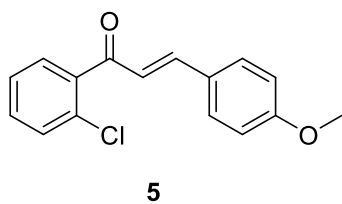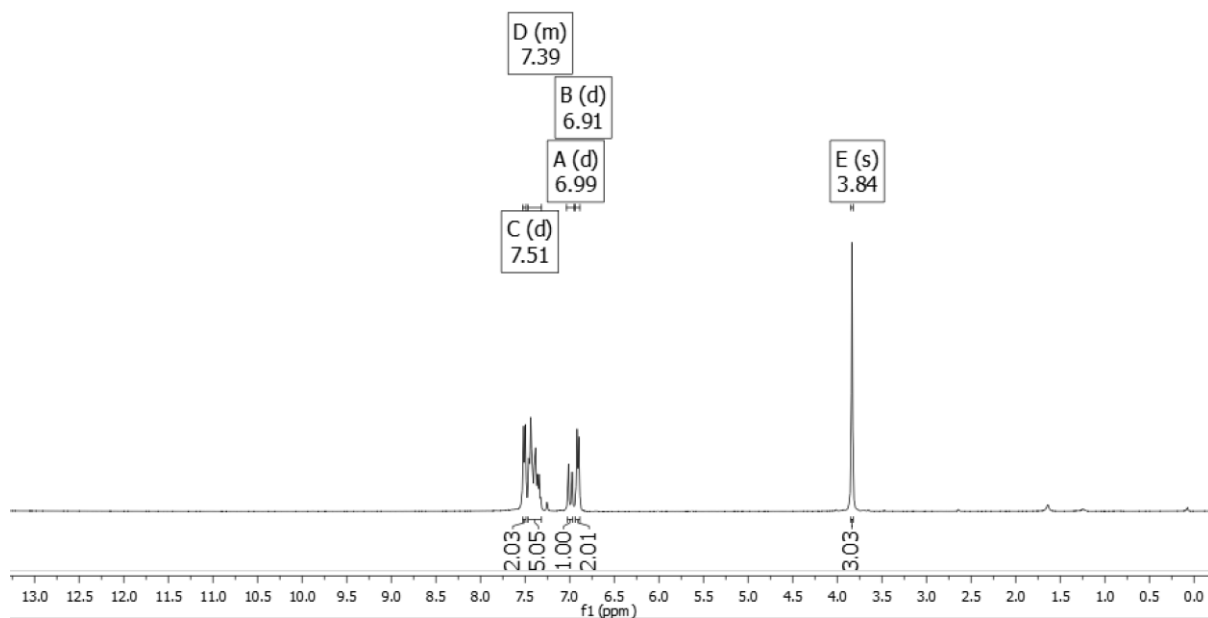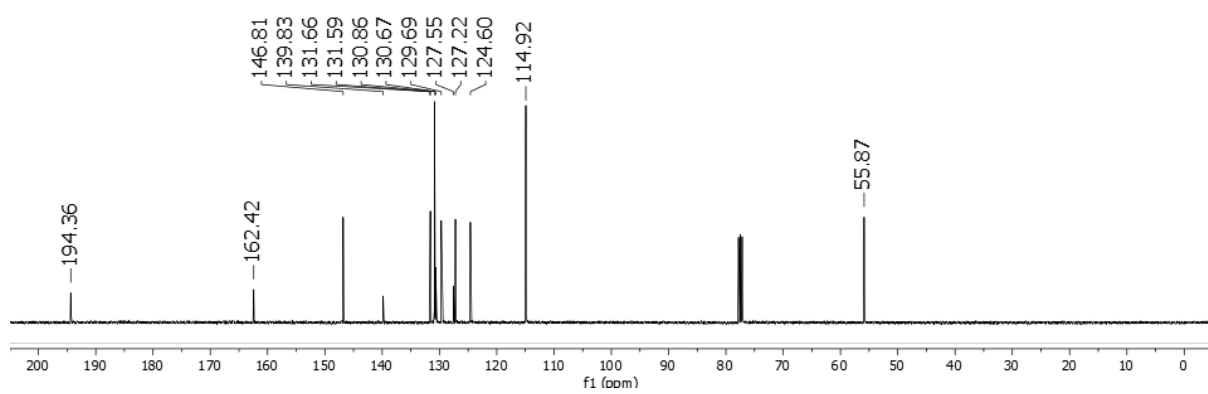

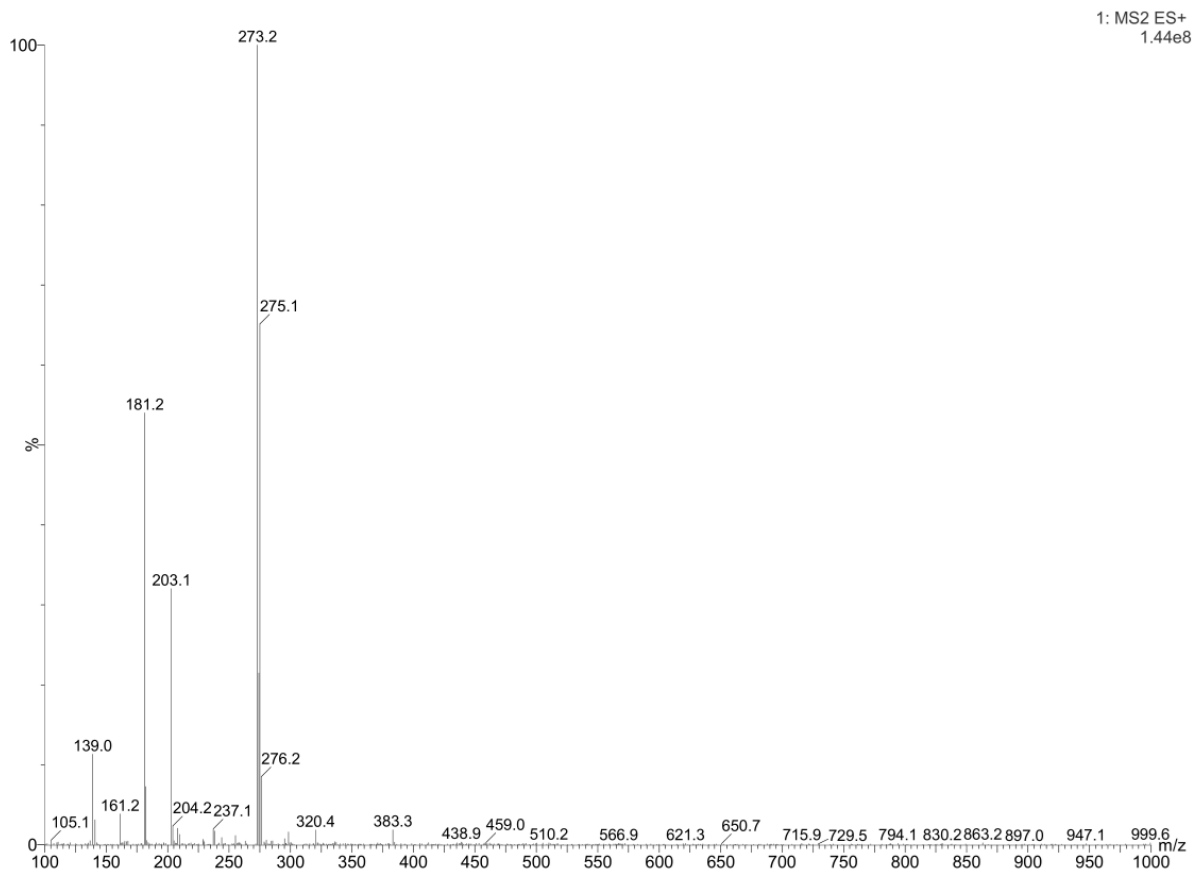

**Figure S15.** Mass spectrum of compound **5**.

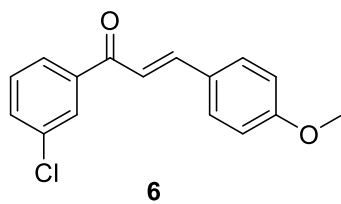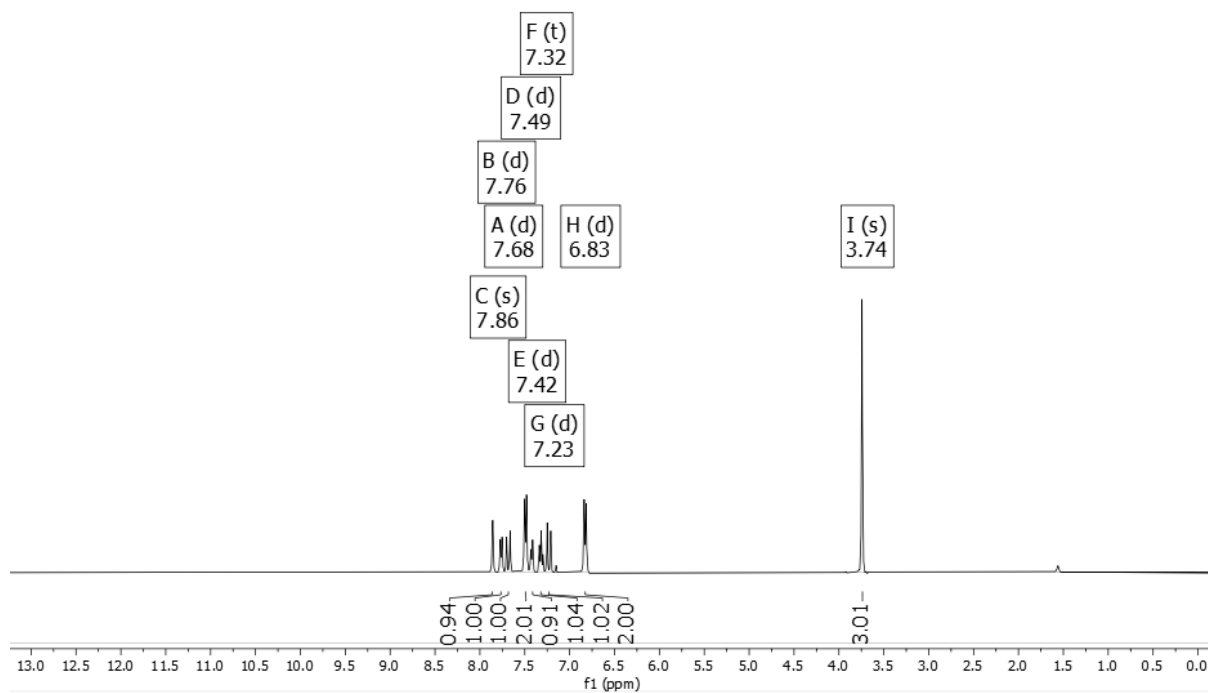

**Figure S16.**  $^1\text{H}$  NMR (400 MHz,  $\text{CDCl}_3$ ) spectrum of compound **6**.

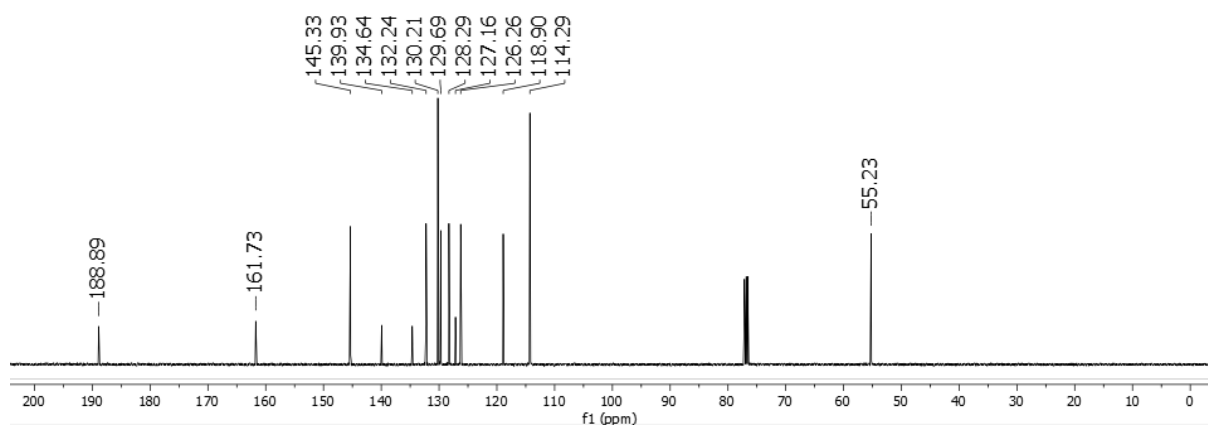

**Figure S17.**  $^{13}\text{C}$  NMR (101 MHz,  $\text{CDCl}_3$ ) spectrum of compound **6**.

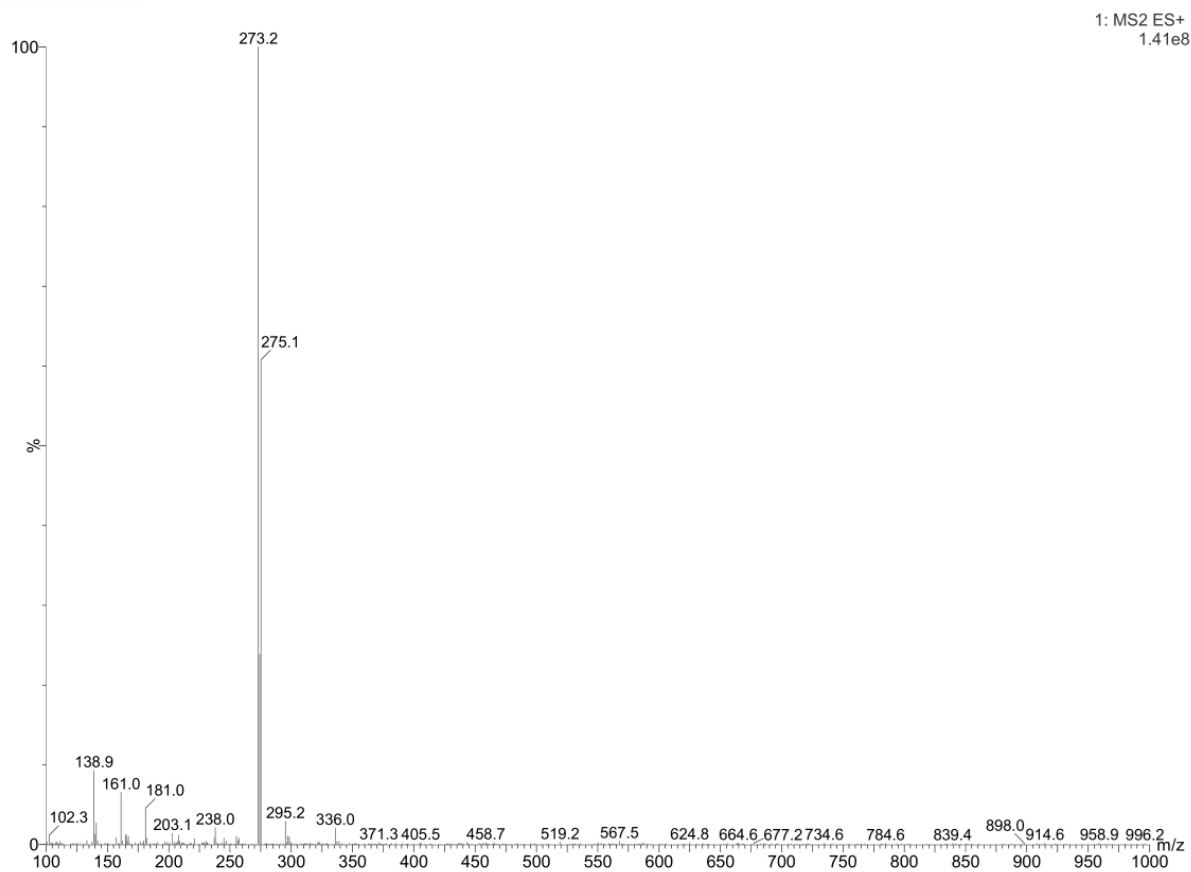

**Figure S18.** Mass spectrum of compound **6**.

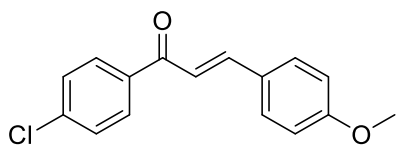

7

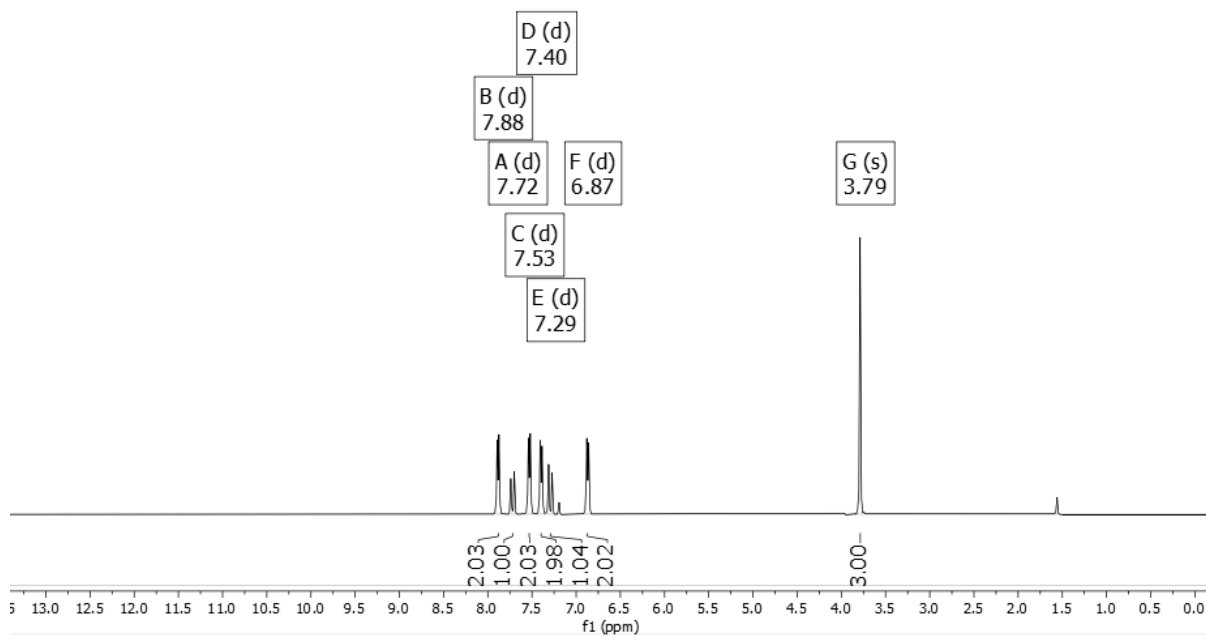

Figure S19.  $^1\text{H}$  NMR (400 MHz,  $\text{CDCl}_3$ ) spectrum of compound 7.

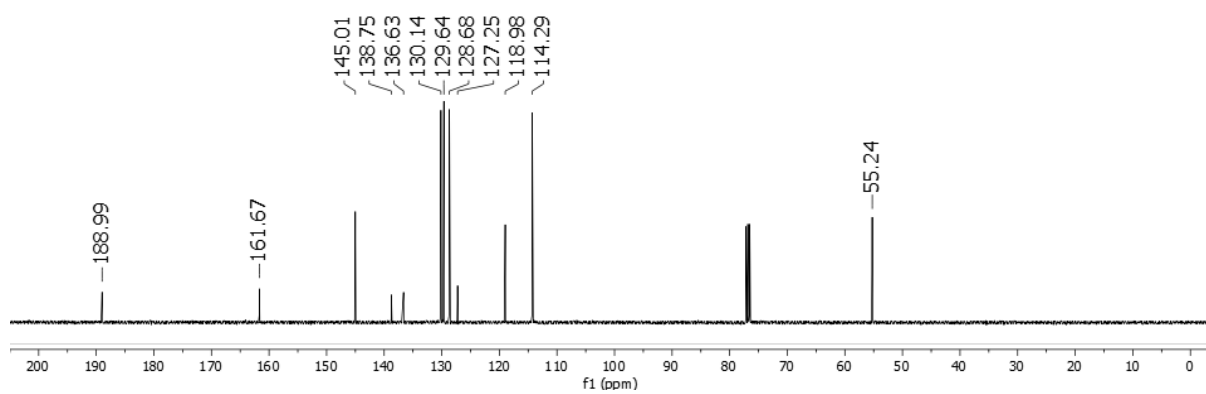

Figure S20.  $^{13}\text{C}$  NMR (101 MHz,  $\text{CDCl}_3$ ) spectrum of compound 7.

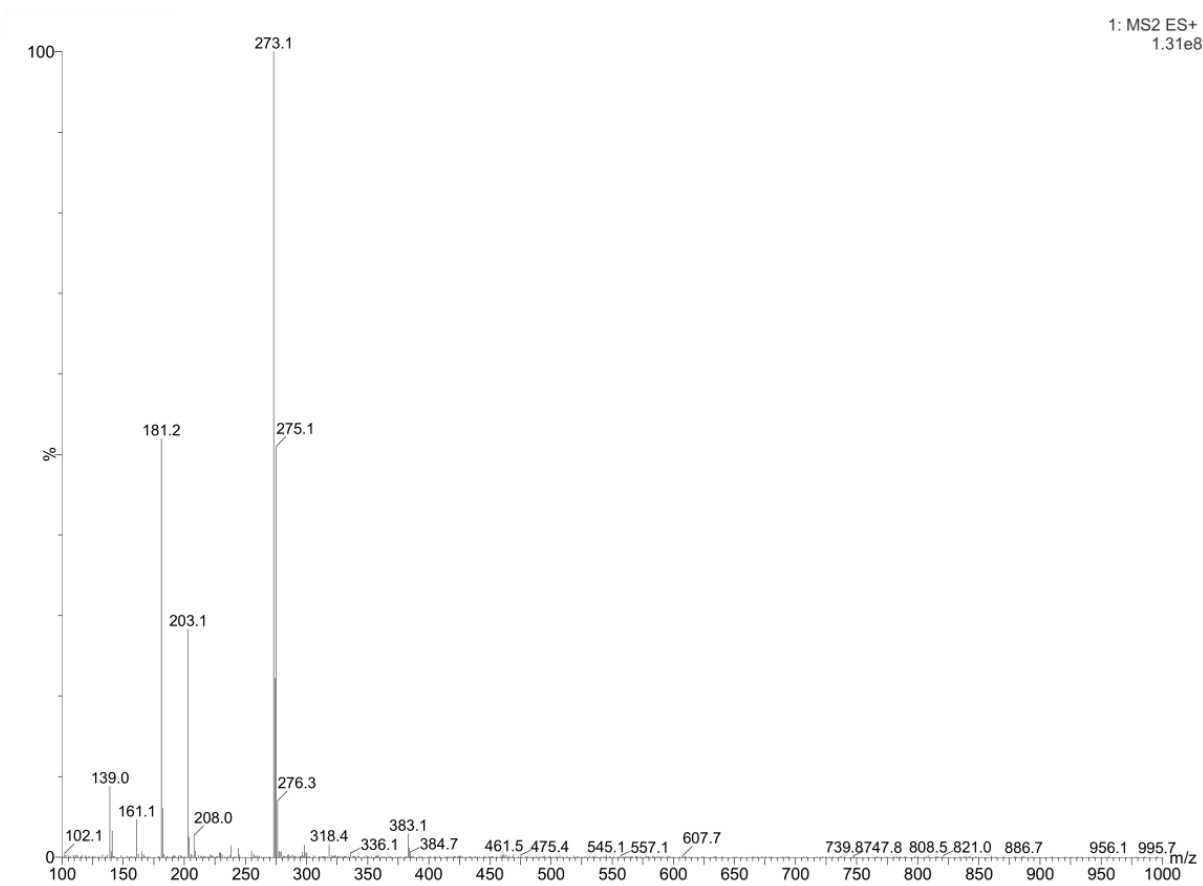

Figure S21. Mass spectrum of compound 7.

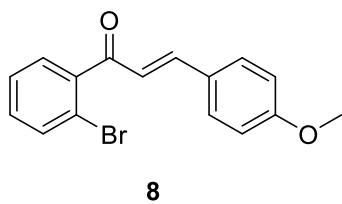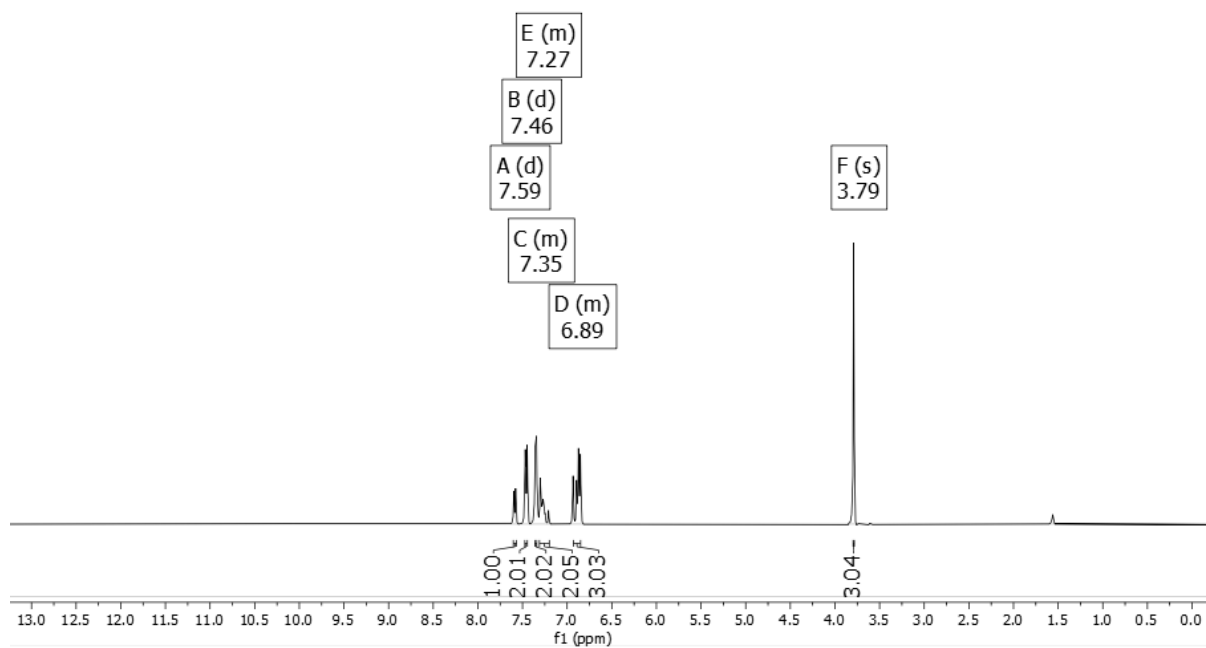

**Figure S22.**  $^1\text{H}$  NMR (400 MHz,  $\text{CDCl}_3$ ) spectrum of compound **8**.

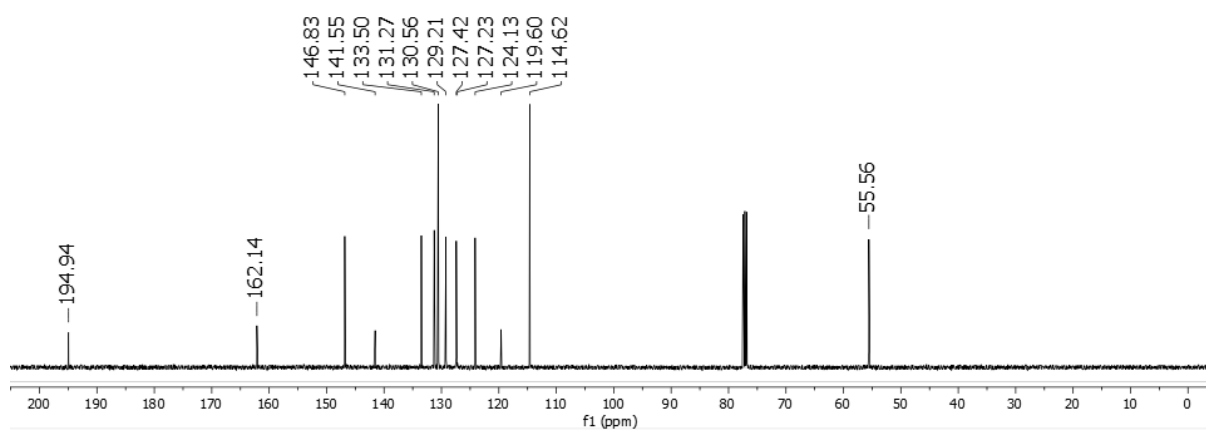

**Figure S23.**  $^{13}\text{C}$  NMR (101 MHz,  $\text{CDCl}_3$ ) spectrum of compound **8**.

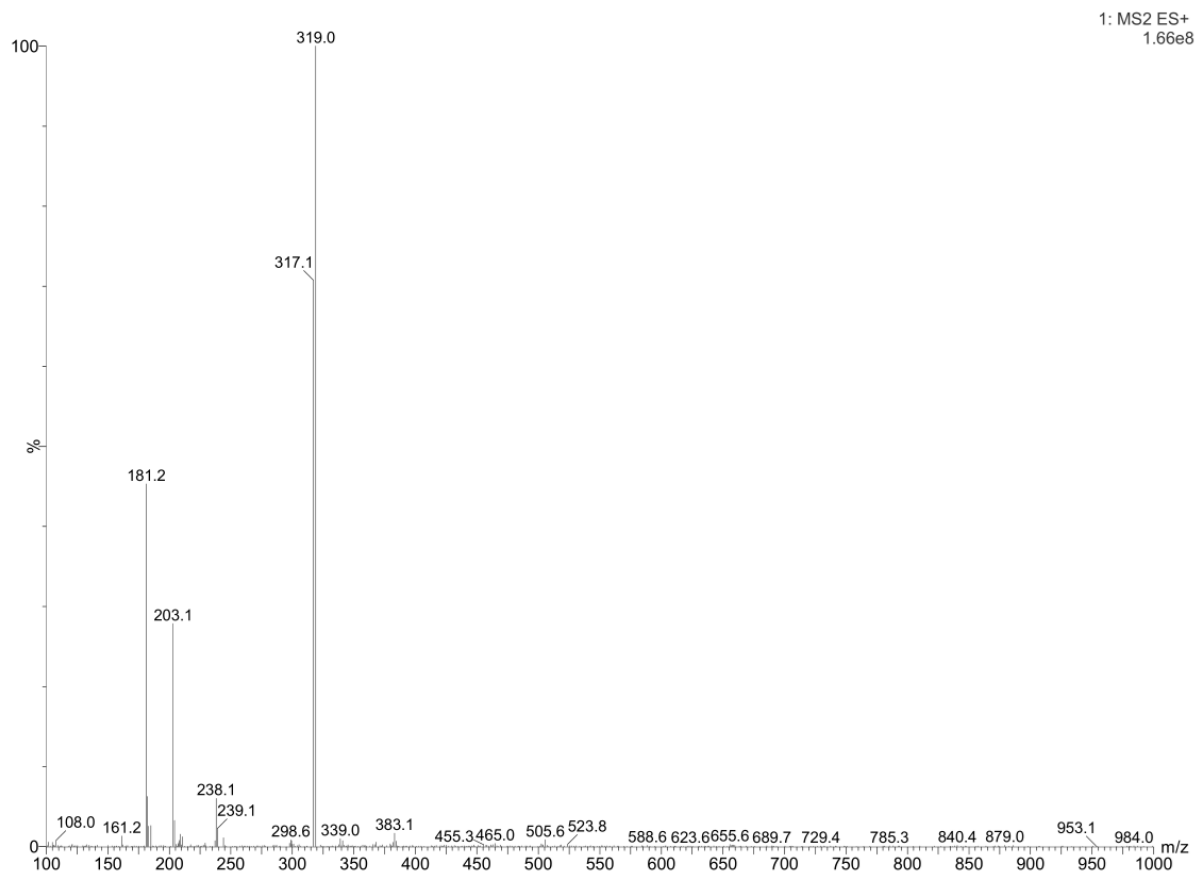

Figure S24. Mass spectrum of compound 8.

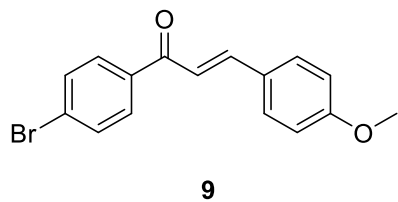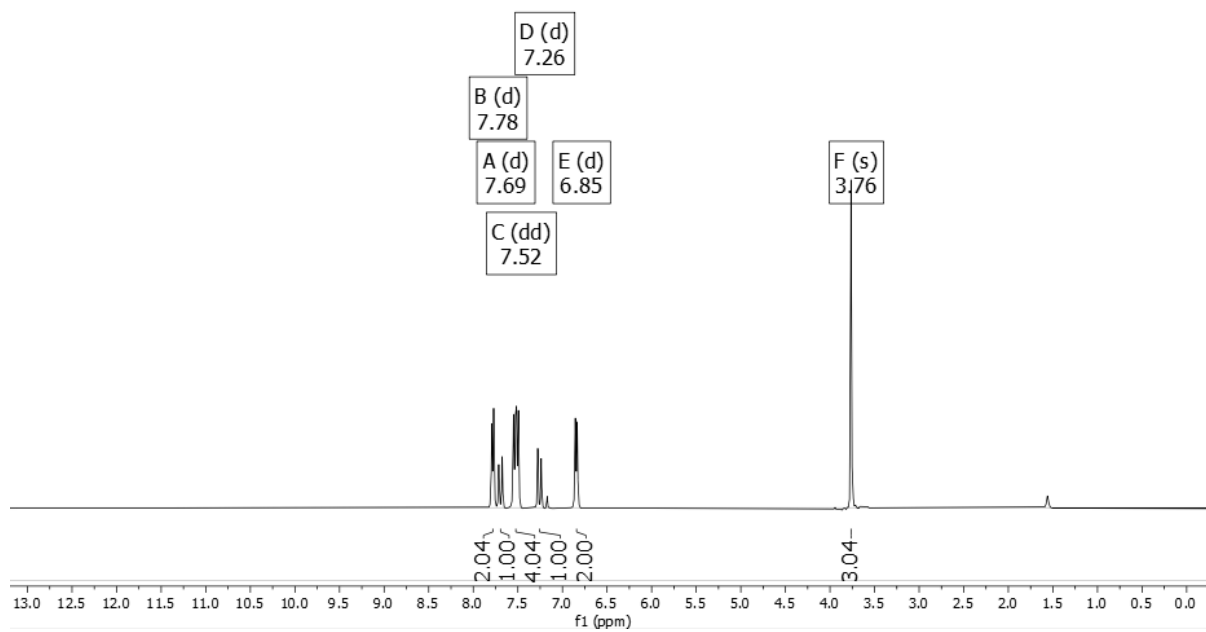

**Figure S25.**  $^1\text{H}$  NMR (400 MHz,  $\text{CDCl}_3$ ) spectrum of compound **9**.

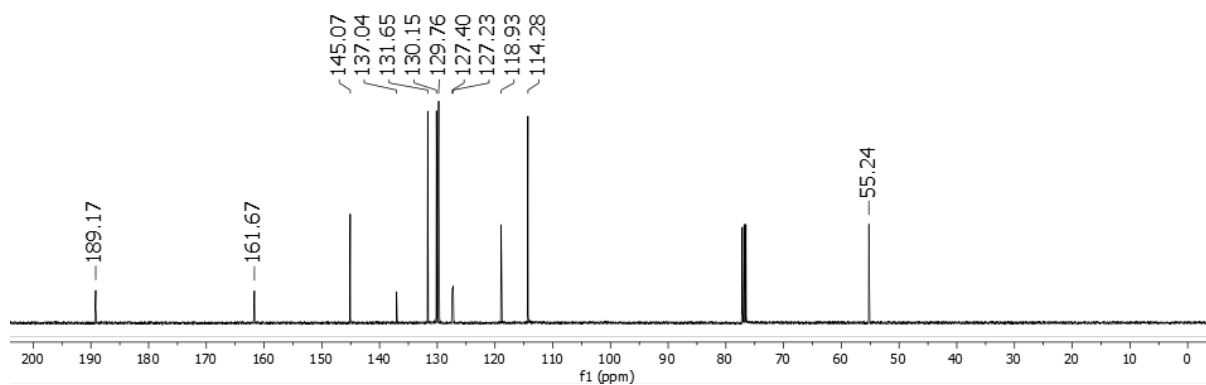

**Figure S26.**  $^{13}\text{C}$  NMR (101 MHz,  $\text{CDCl}_3$ ) spectrum of compound **9**.

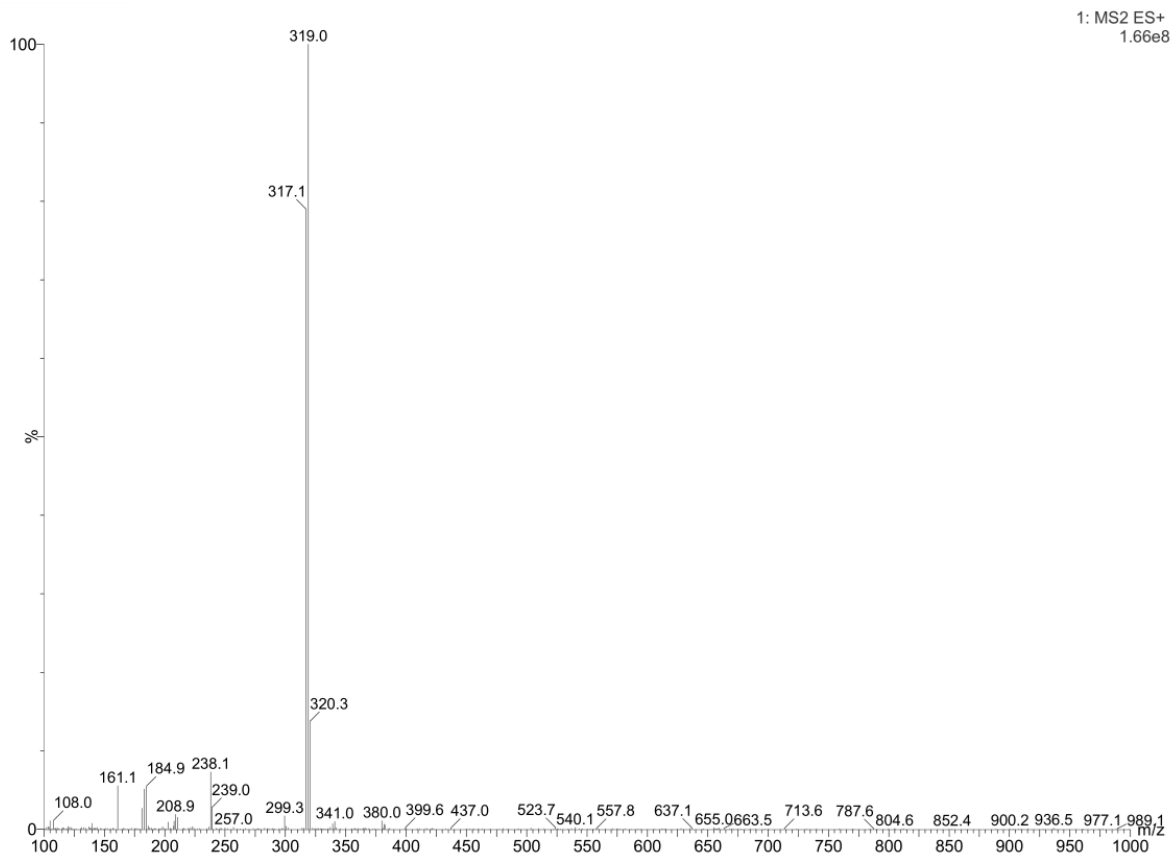

**Figure S27.** Mass spectrum of compound **9**.

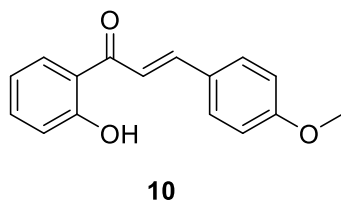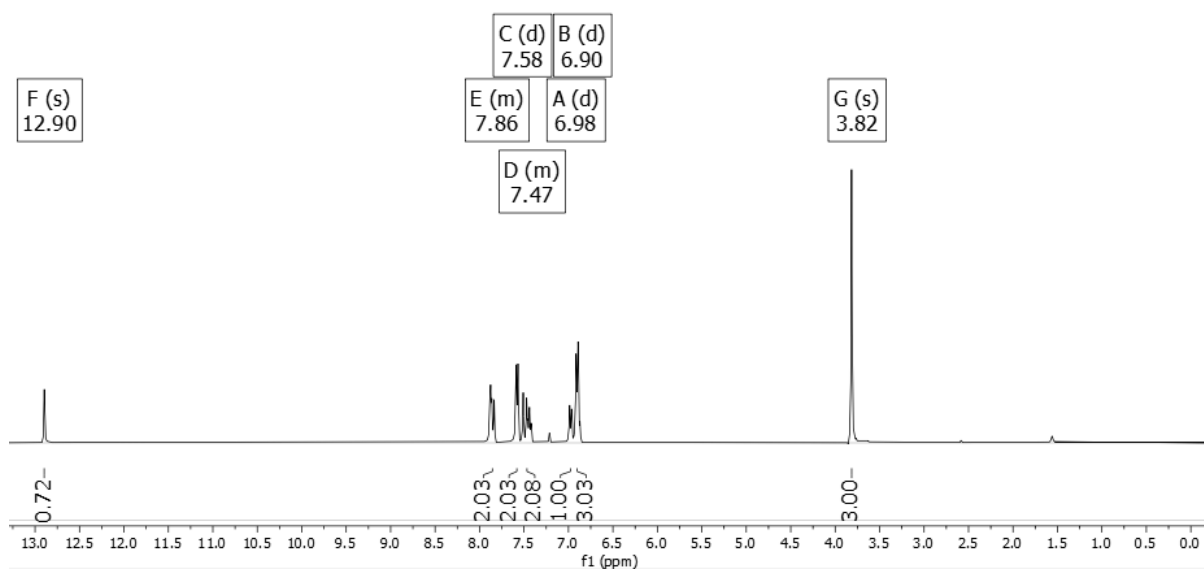

**Figure S28.**  $^1\text{H}$  NMR (400 MHz,  $\text{CDCl}_3$ ) spectrum of compound **10**.

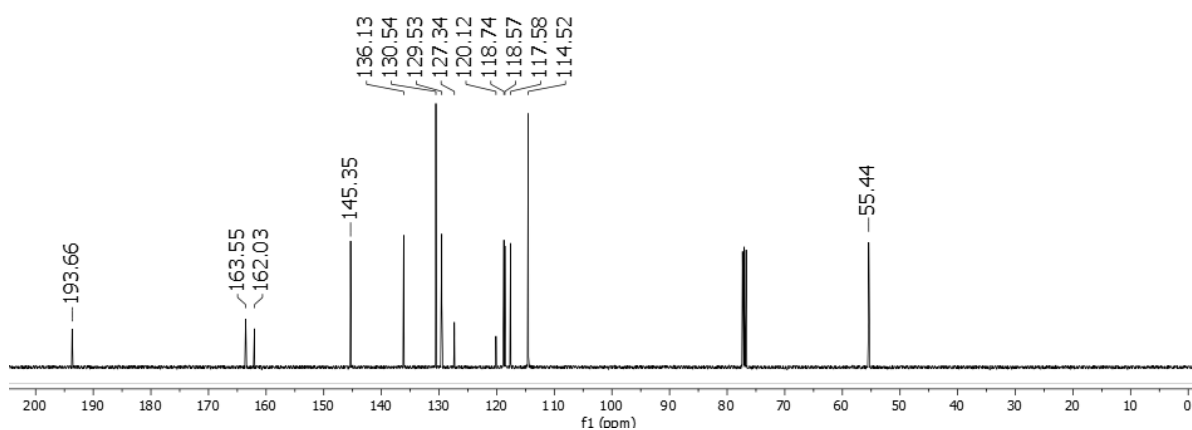

**Figure S29.**  $^{13}\text{C}$  NMR (101 MHz,  $\text{CDCl}_3$ ) spectrum of compound **10**.

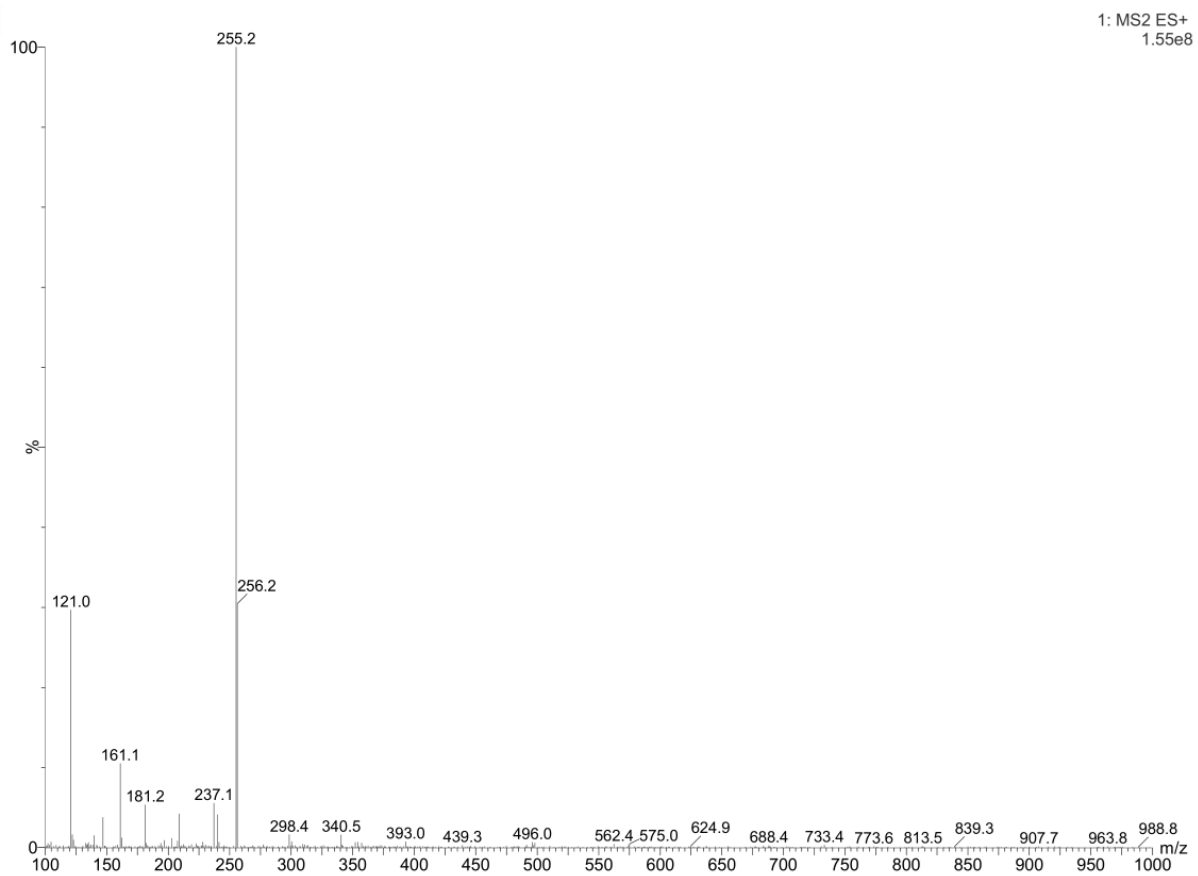

**Figure S30.** Mass spectrum of compound **10**.

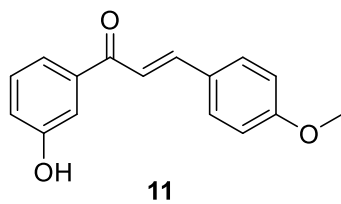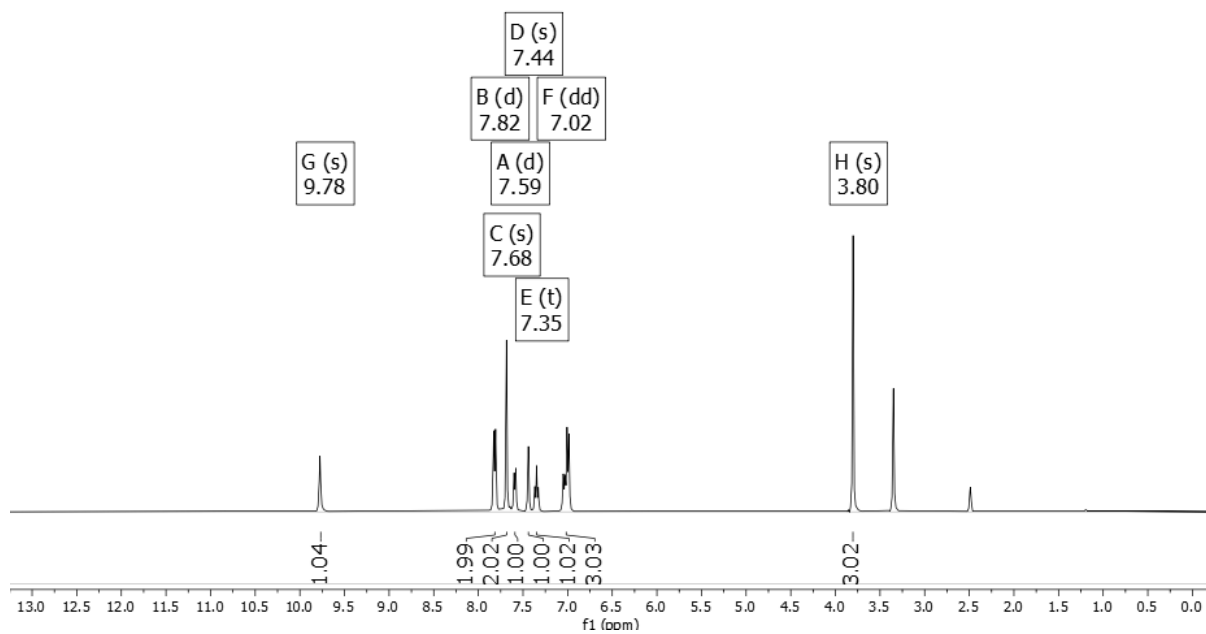

**Figure S31.**  $^1\text{H}$  NMR (400 MHz,  $\text{DMSO-}d_6$ ) spectrum of compound **11**.

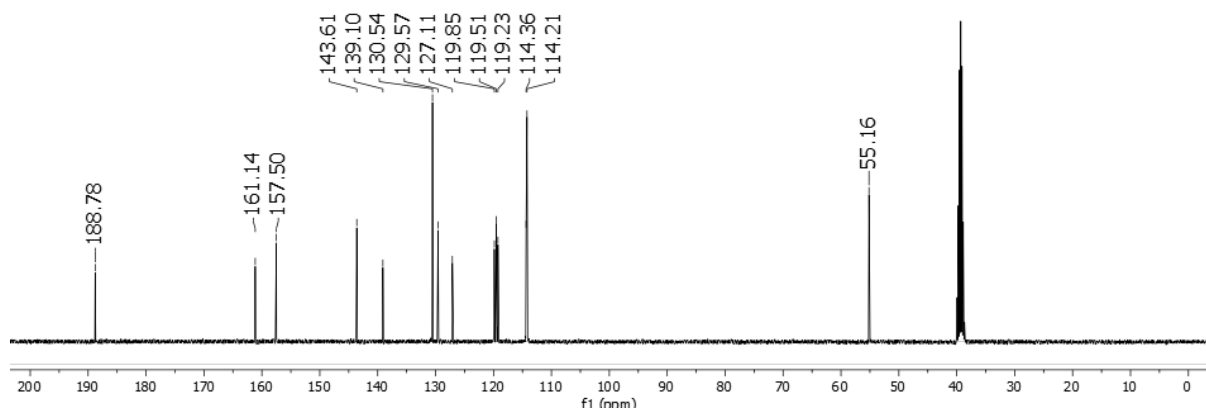

**Figure S32.**  $^{13}\text{C}$  NMR (101 MHz,  $\text{DMSO-}d_6$ ) spectrum of compound **11**.

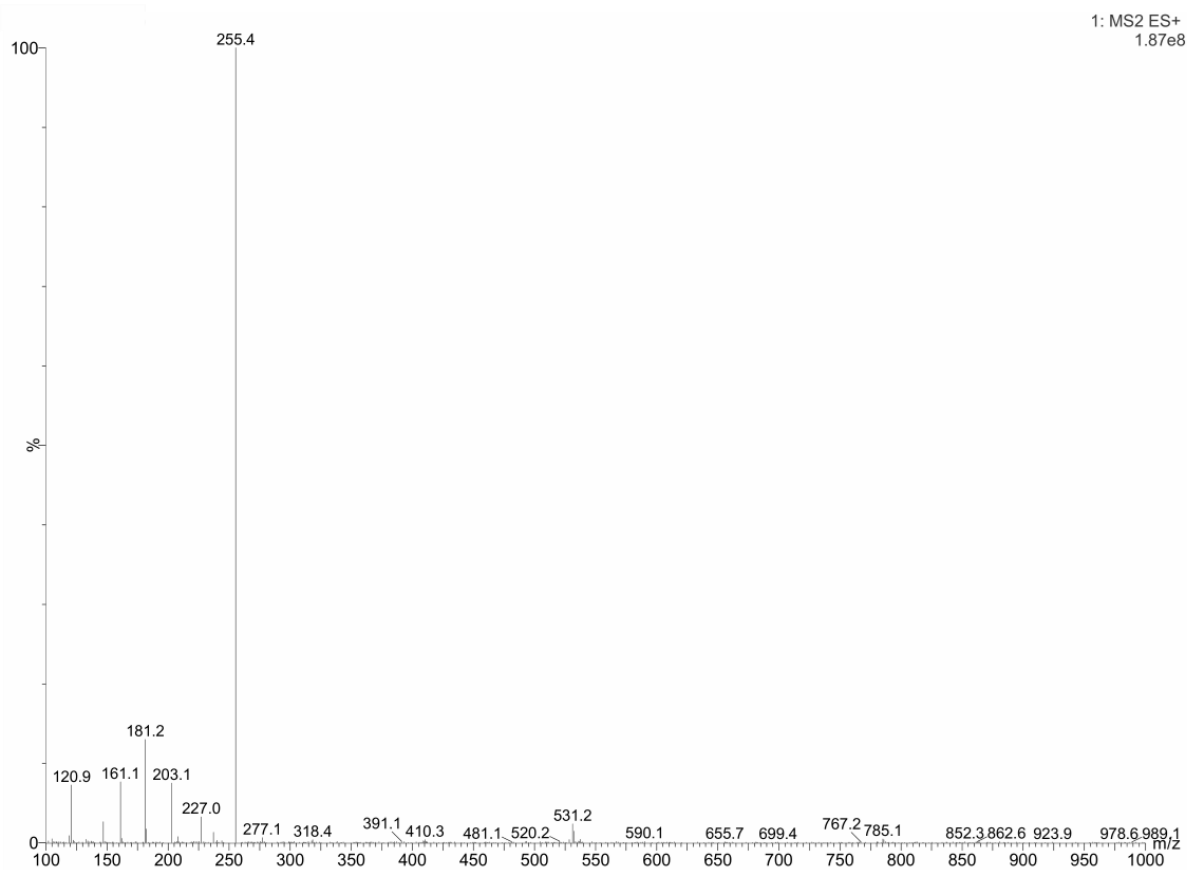

**Figure S33.** Mass spectrum of compound **11**.

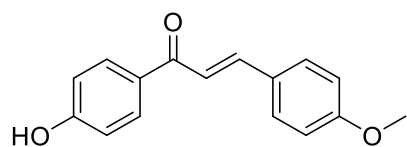

**12**

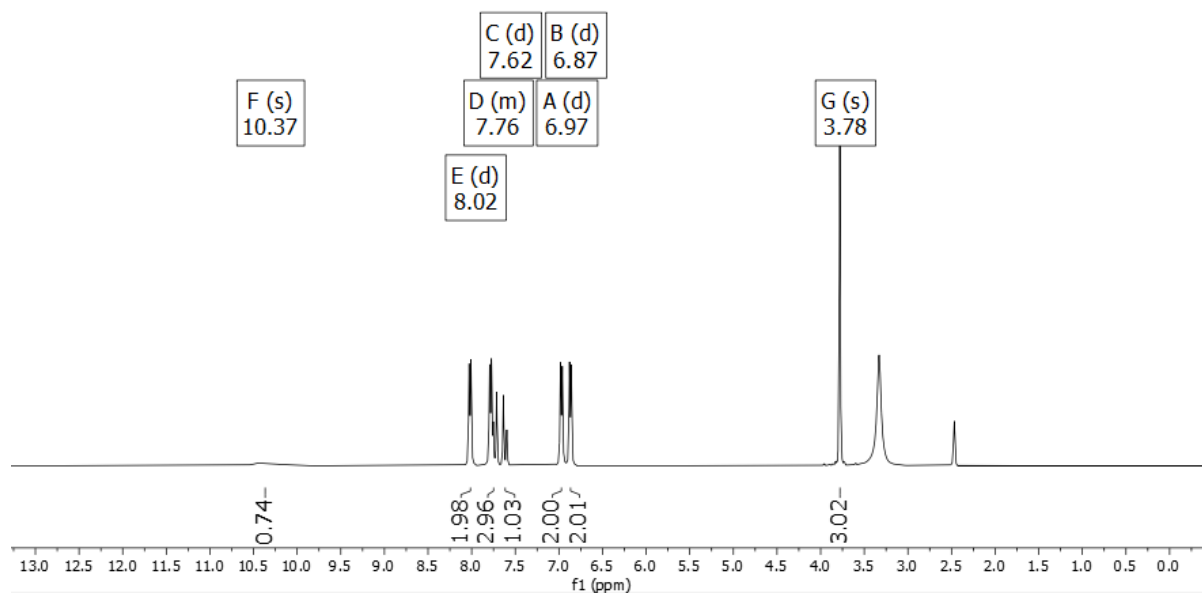

**Figure S34.** <sup>1</sup>H NMR (400 MHz, DMSO-*d*<sub>6</sub>) spectrum of compound **12**.

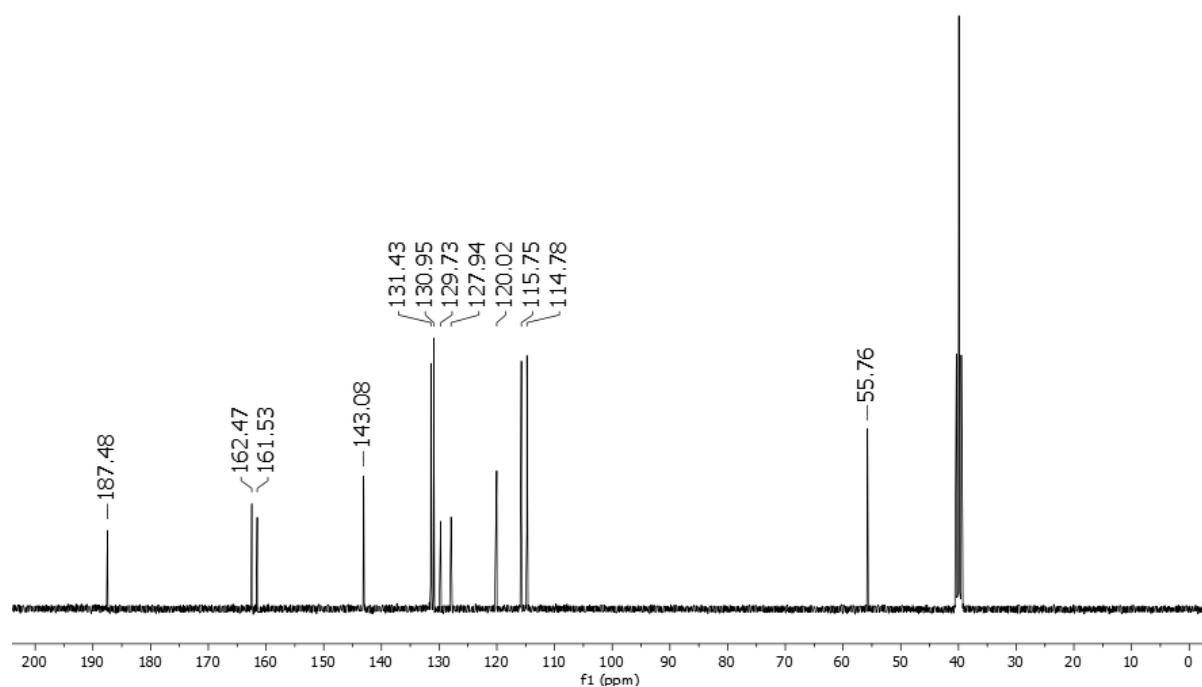

**Figure S35.** <sup>13</sup>C NMR (101 MHz, DMSO-*d*<sub>6</sub>) spectrum of compound **12**.

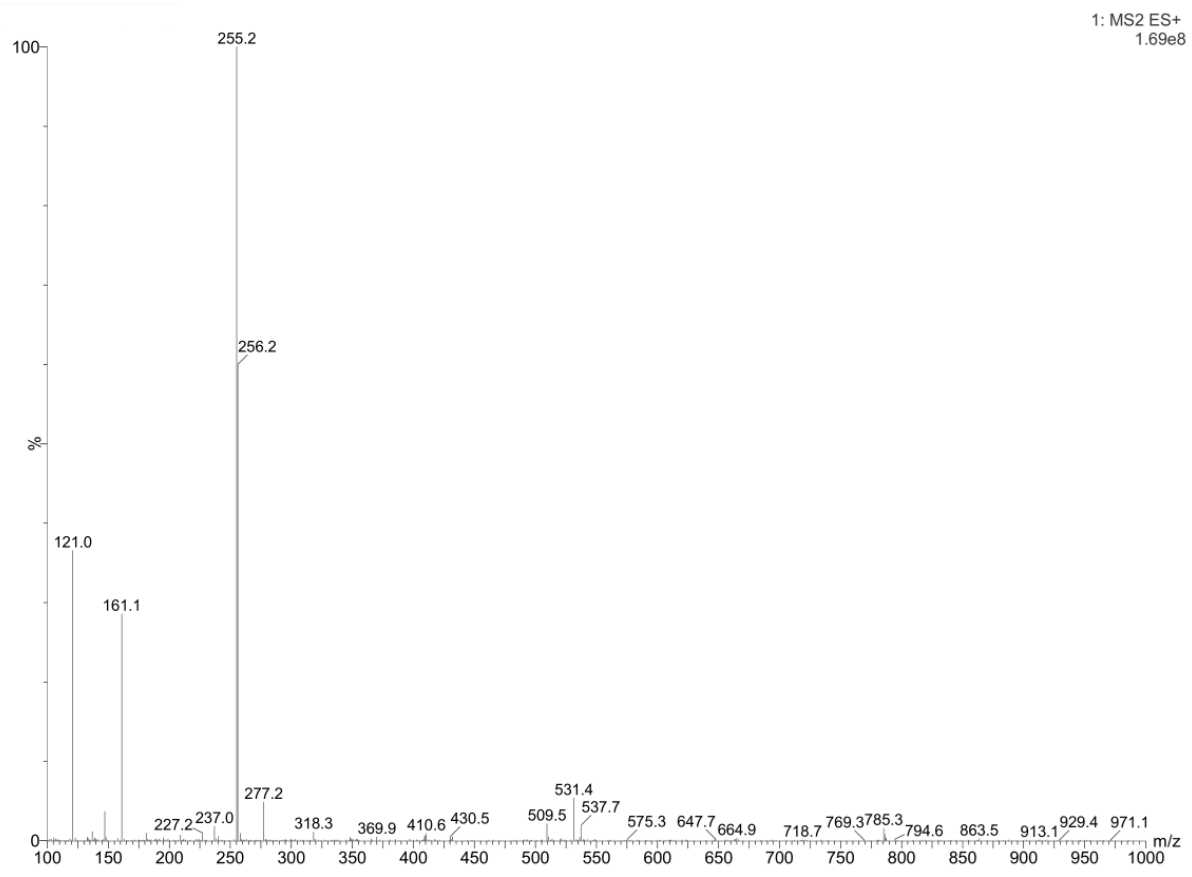

**Figure S36.** Mass spectrum of compound **12**.

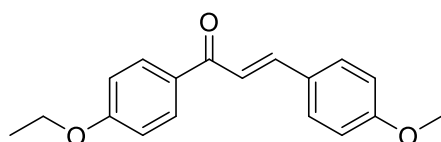

**13**

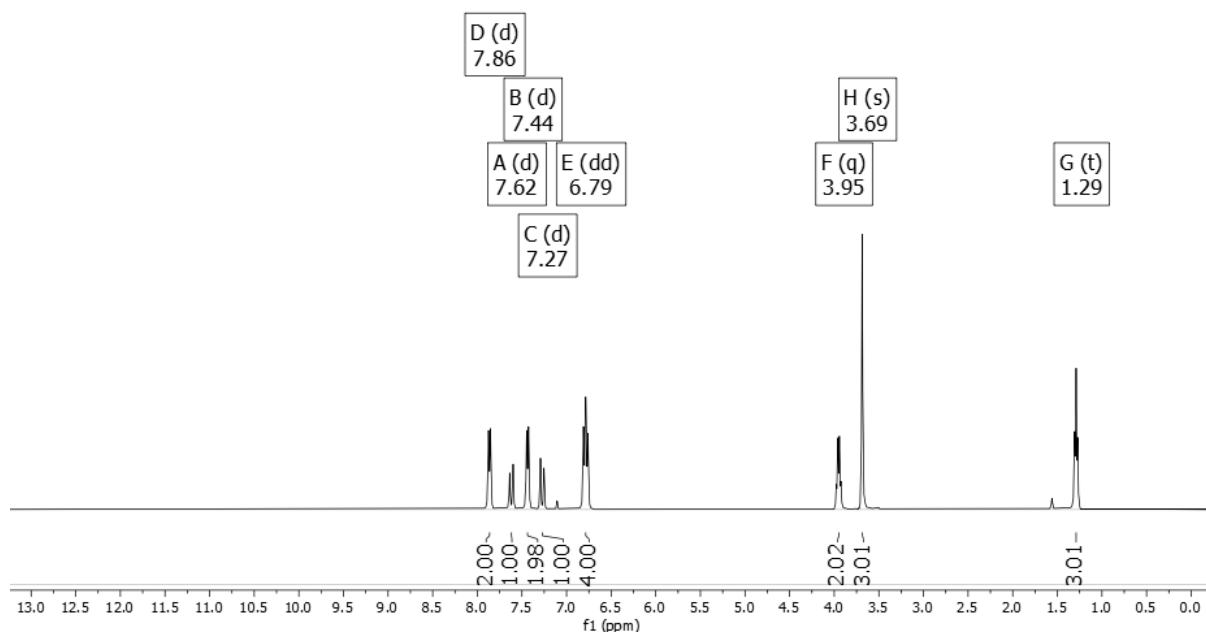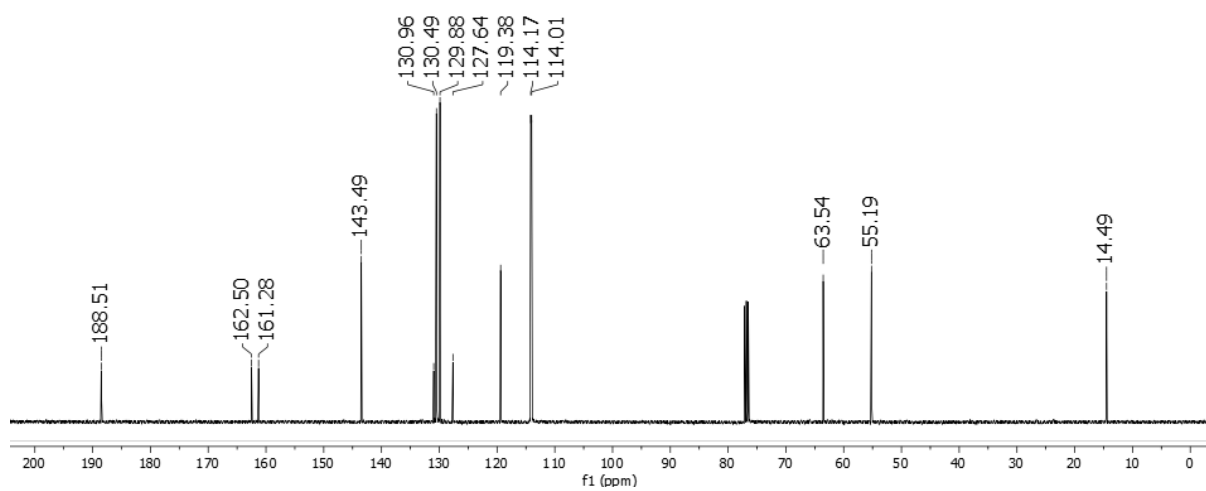

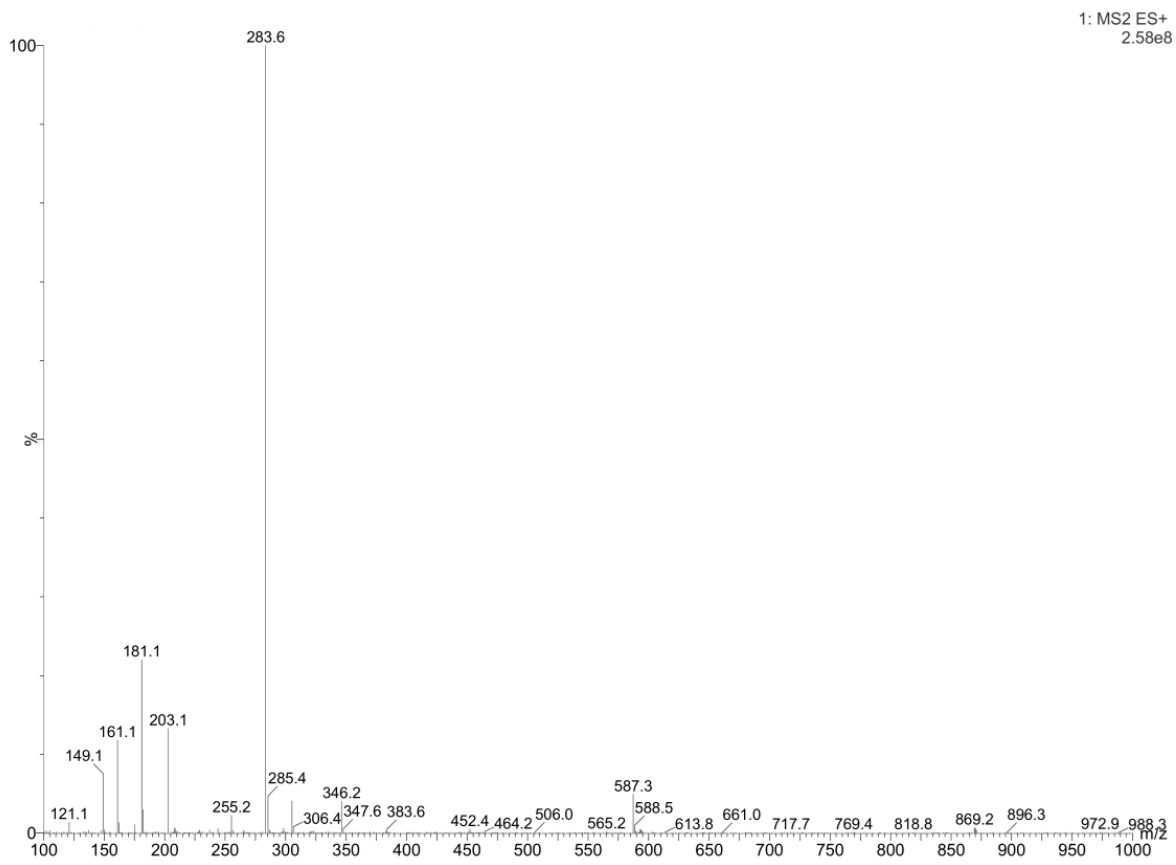

**Figure S39.** Mass spectrum of compound **13**.

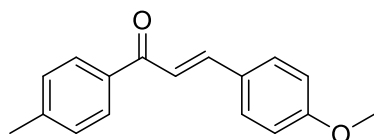

14

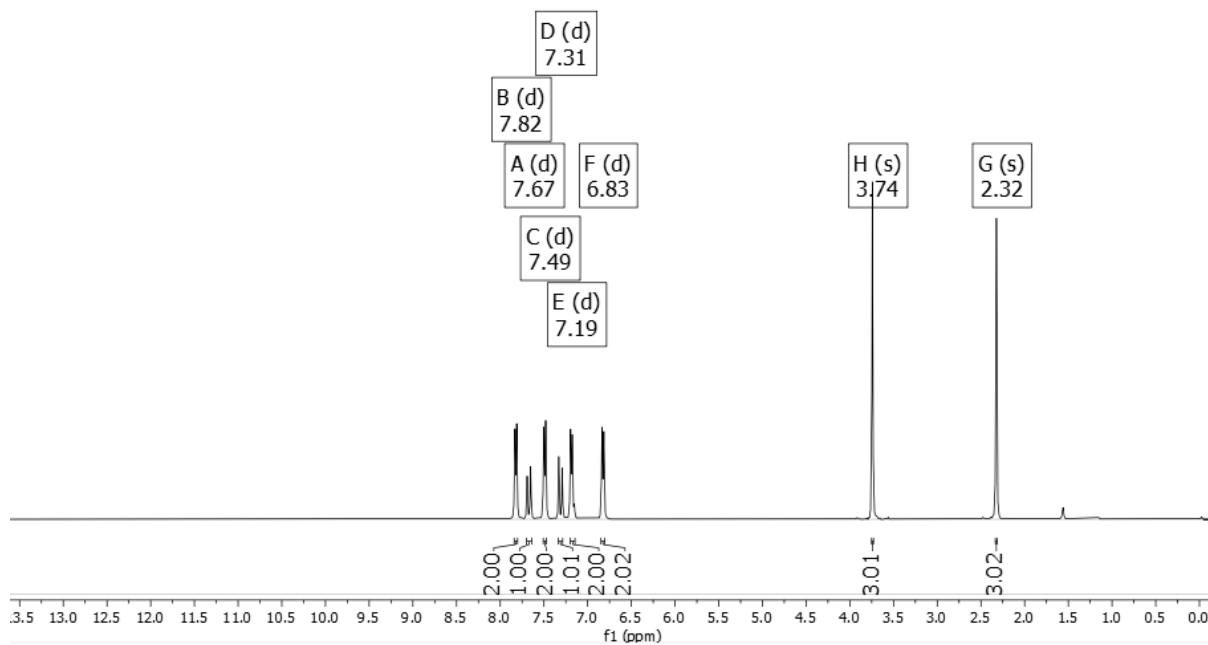

Figure S40.  $^1\text{H}$  NMR (400 MHz,  $\text{CDCl}_3$ ) spectrum of compound 14.

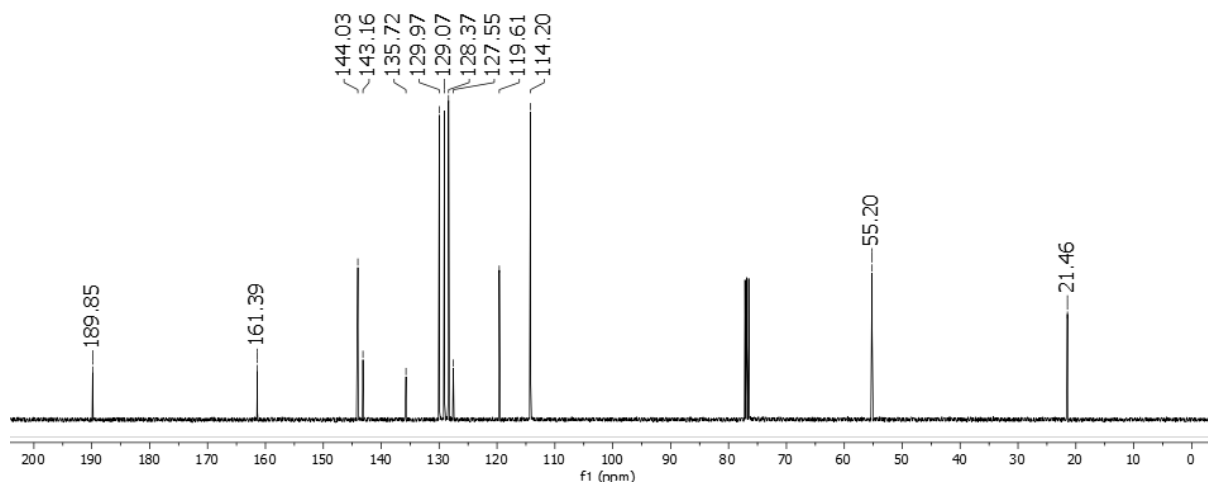

Figure S41.  $^{13}\text{C}$  NMR (101 MHz,  $\text{CDCl}_3$ ) spectrum of compound 14.

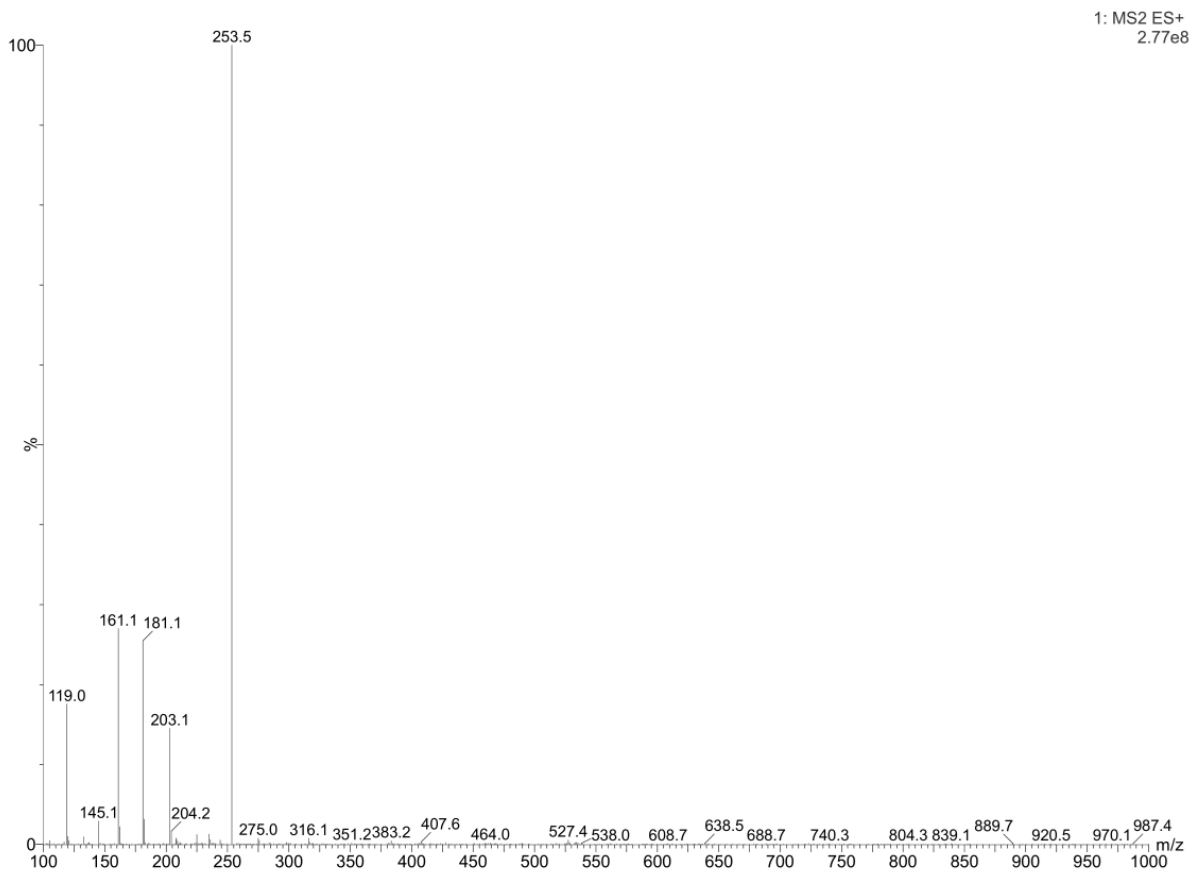

**Figure S42.** Mass spectrum of compound 14.

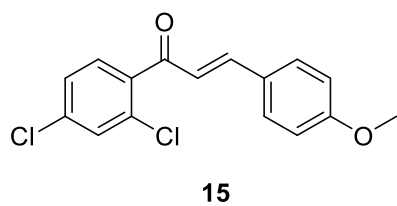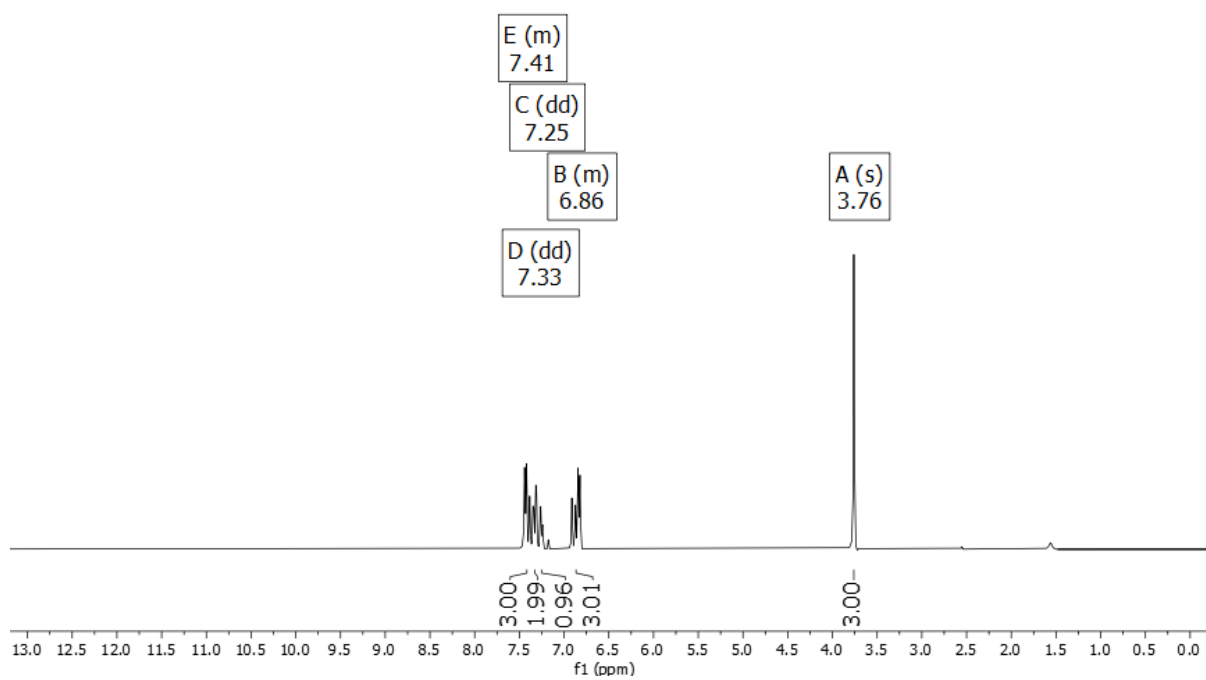

**Figure S43.** <sup>1</sup>H NMR (400 MHz, CDCl<sub>3</sub>) spectrum of compound **15**.

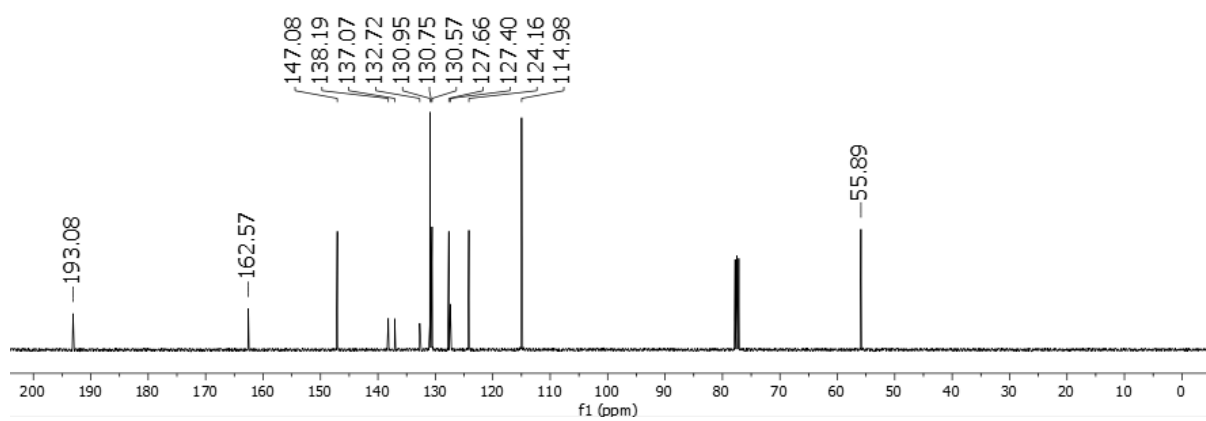

**Figure S44.** <sup>13</sup>C NMR (101 MHz, CDCl<sub>3</sub>) spectrum of compound **15**.

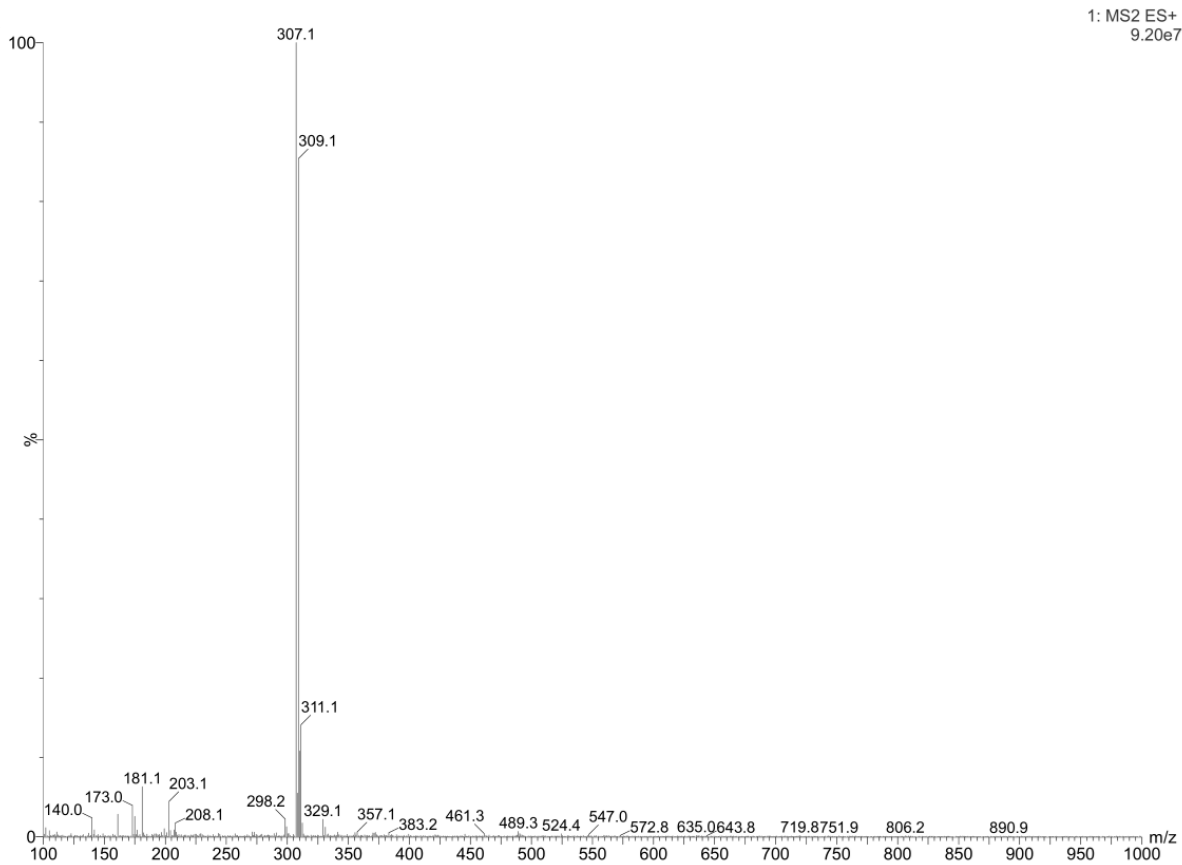

**Figure S45.** Mass spectrum of compound **15**.

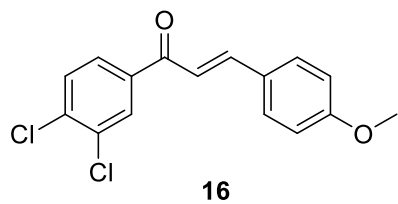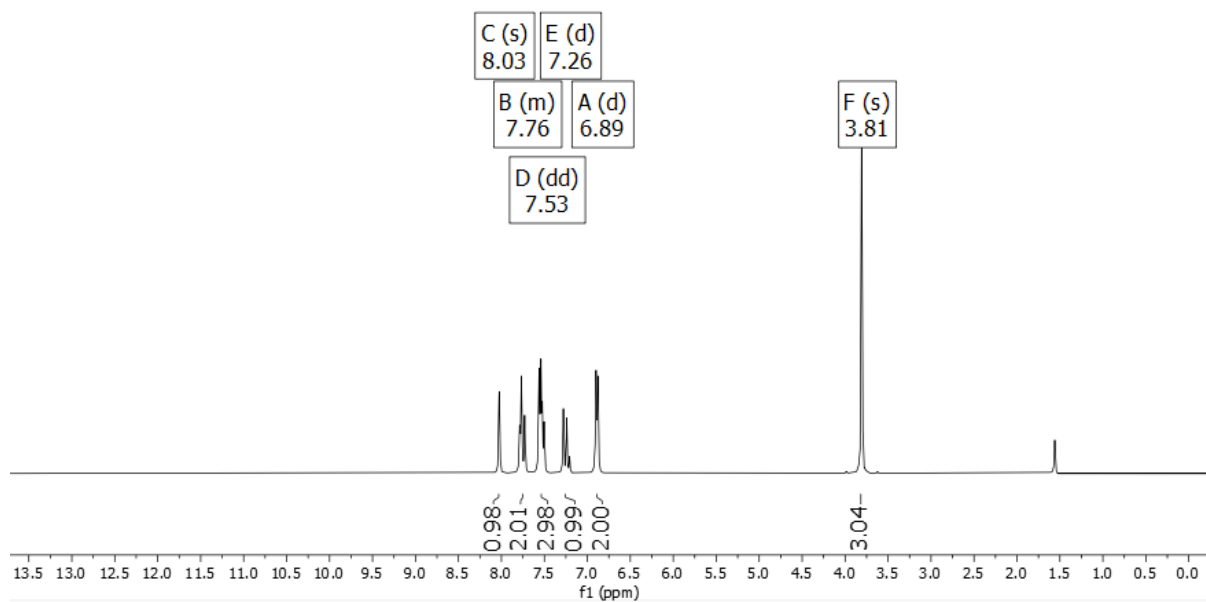

**Figure S46.**  $^1\text{H}$  NMR (400 MHz,  $\text{CDCl}_3$ ) spectrum of compound **16**.

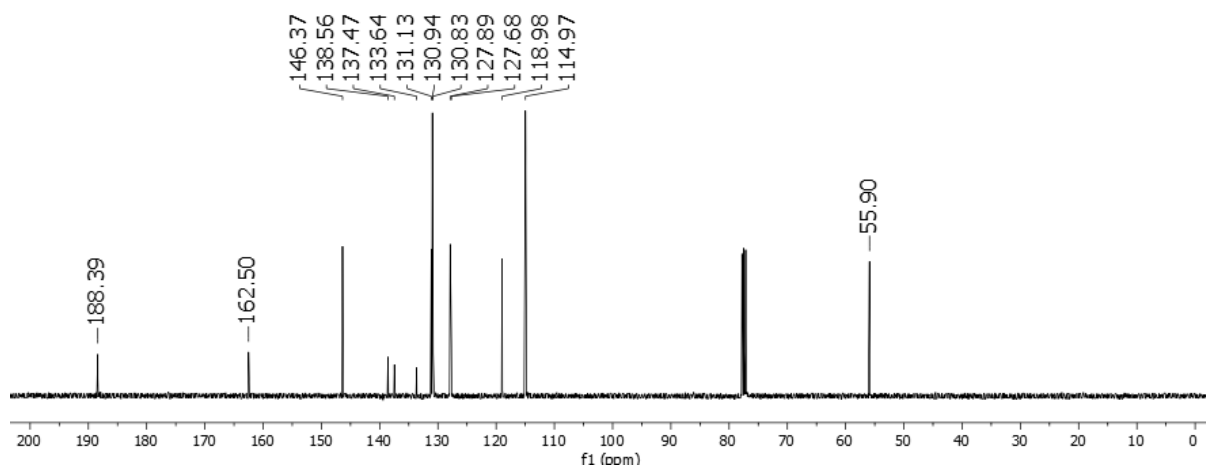

**Figure S47.**  $^{13}\text{C}$  NMR (101 MHz,  $\text{CDCl}_3$ ) spectrum of compound **16**.

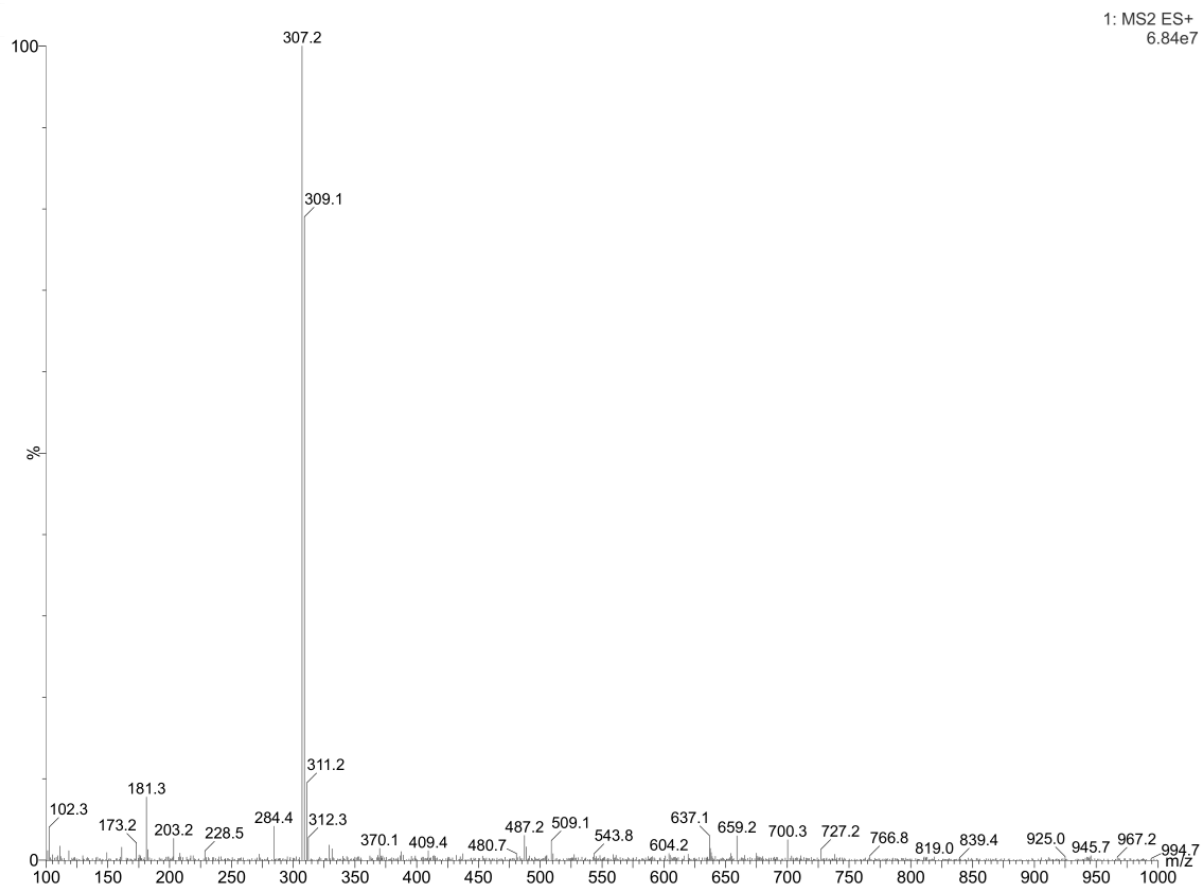

**Figure S48.** Mass spectrum of compound **16**.

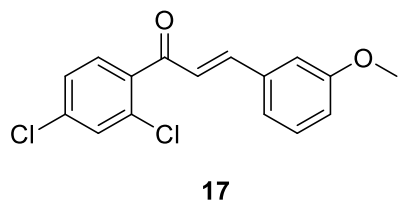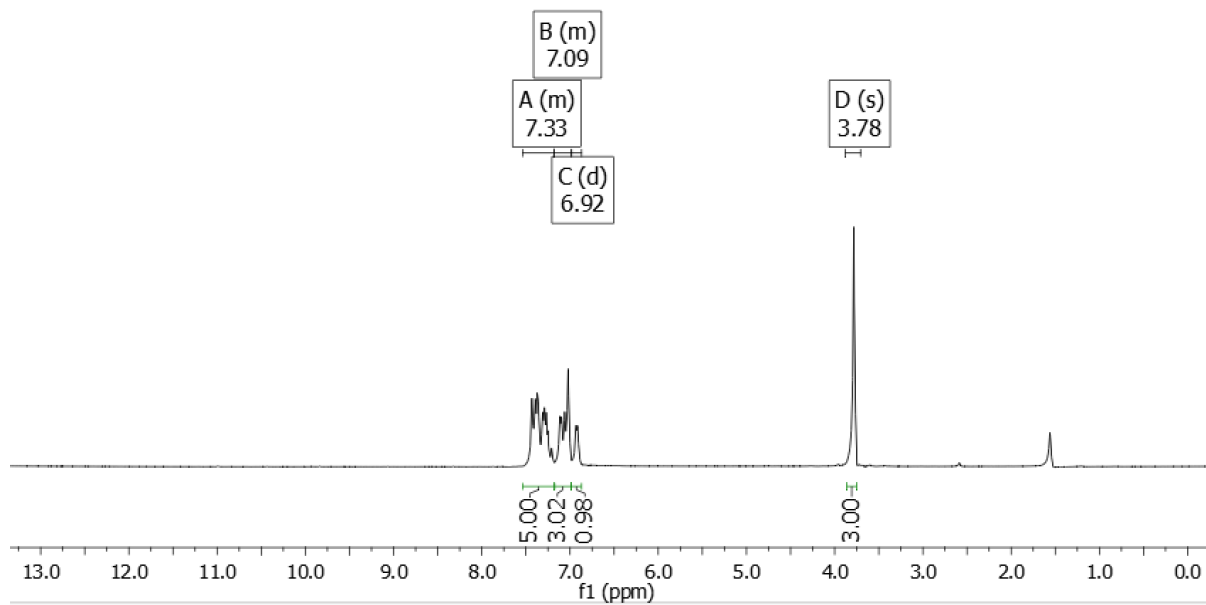

**Figure S49.**  $^1\text{H}$  NMR (400 MHz,  $\text{CDCl}_3$ ) spectrum of compound **17**.

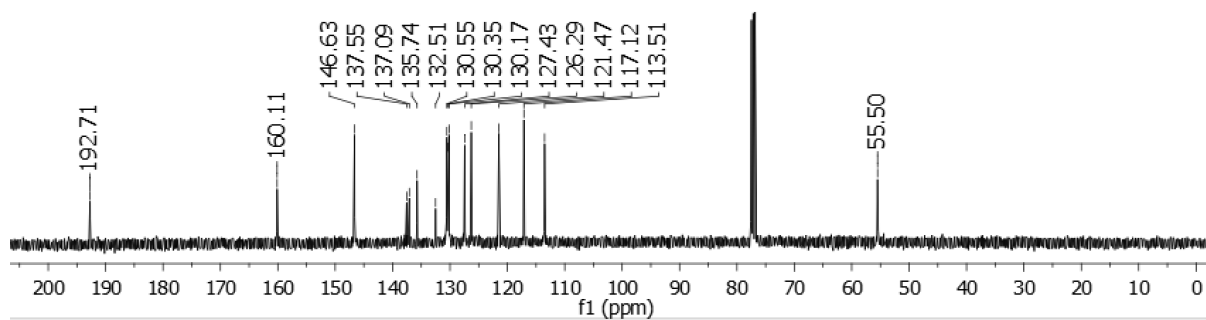

**Figure S50.**  $^{13}\text{C}$  NMR (101 MHz,  $\text{CDCl}_3$ ) spectrum of compound **17**.

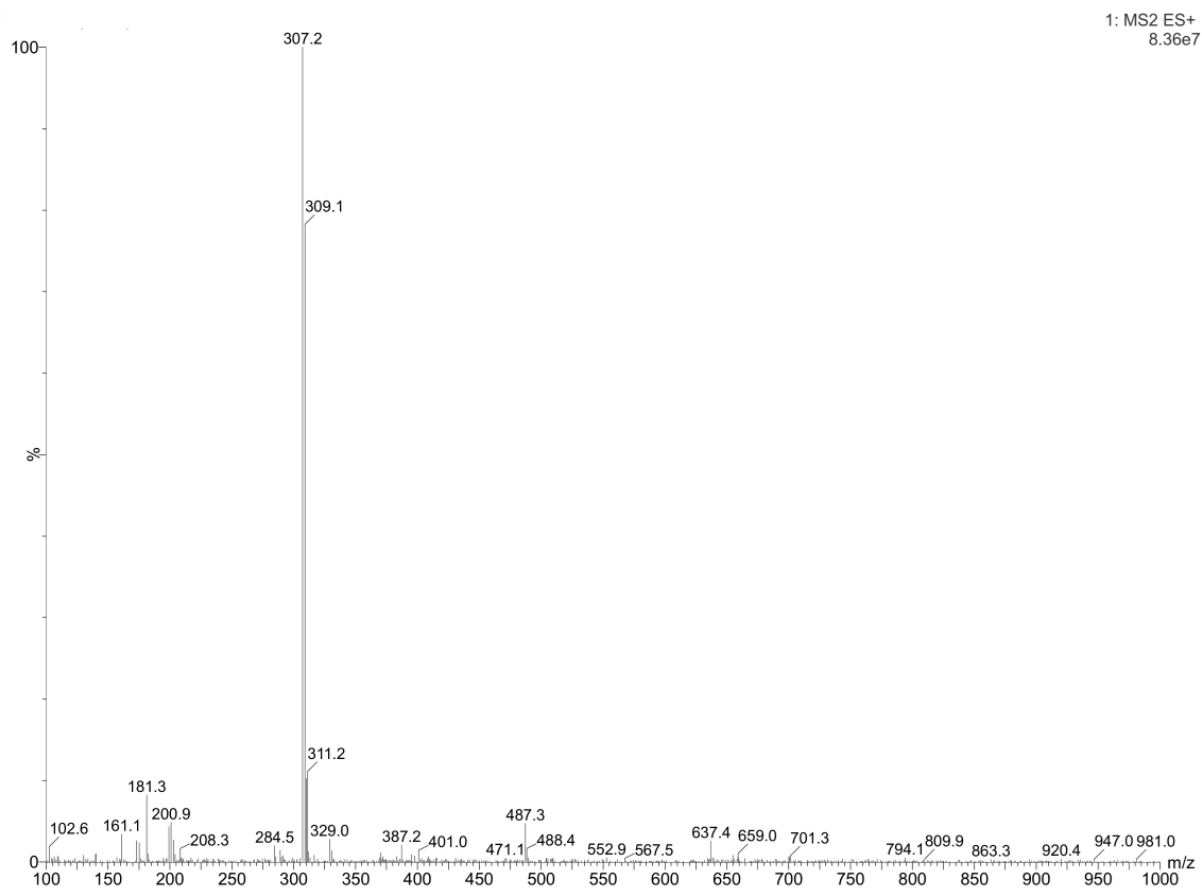

**Figure S51.** Mass spectrum of compound 17.

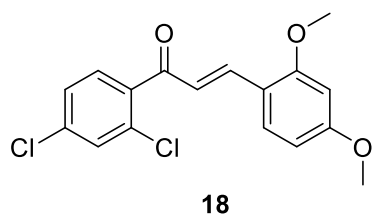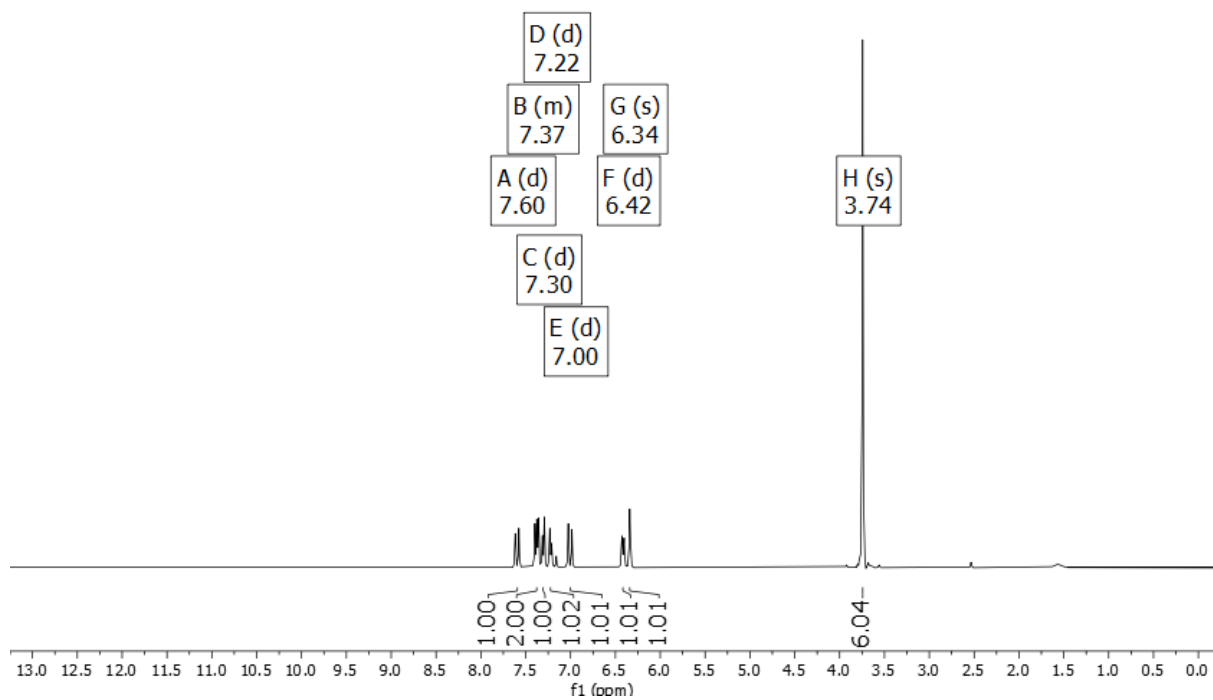

**Figure S52.**  $^1\text{H}$  NMR (400 MHz,  $\text{CDCl}_3$ ) spectrum of compound **18**.

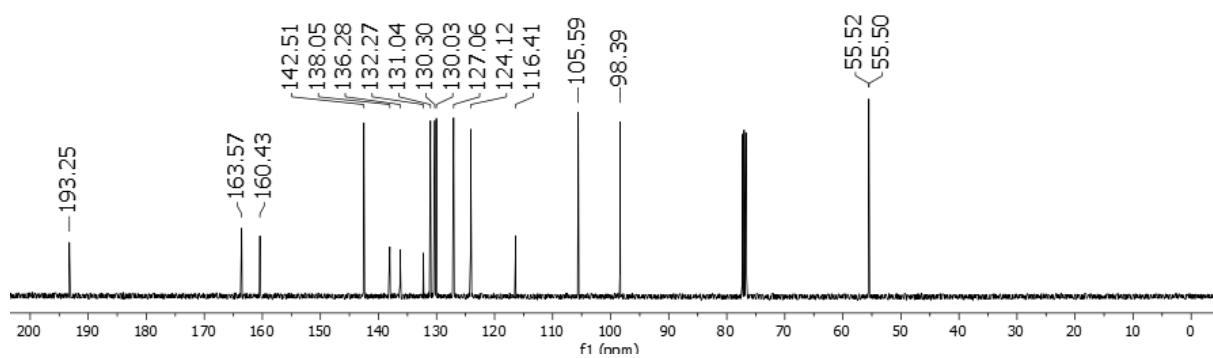

**Figure S53.**  $^{13}\text{C}$  NMR (101 MHz,  $\text{CDCl}_3$ ) spectrum of compound **18**.

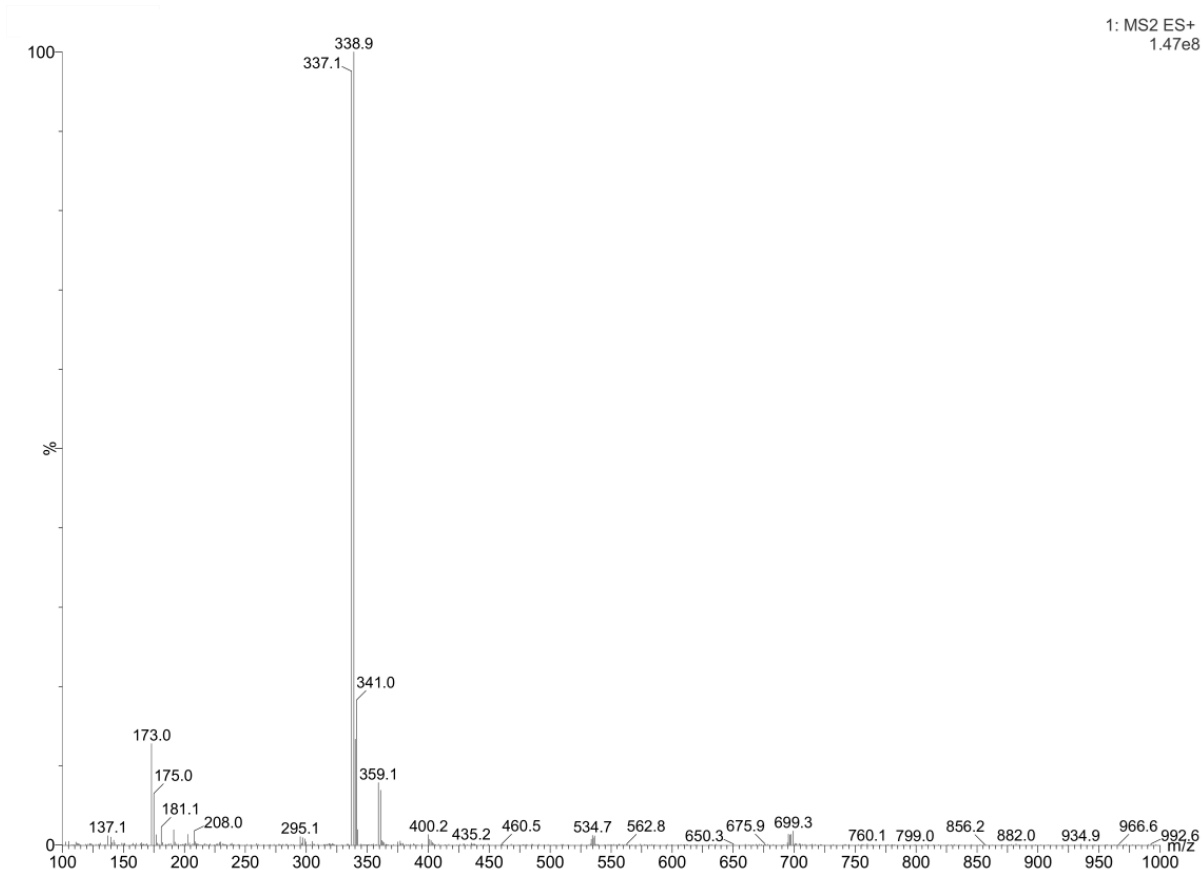

**Figure S54.** Mass spectrum of compound **18**.

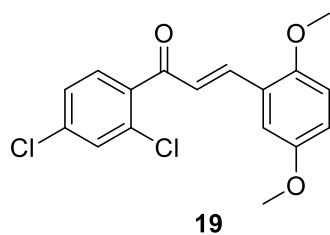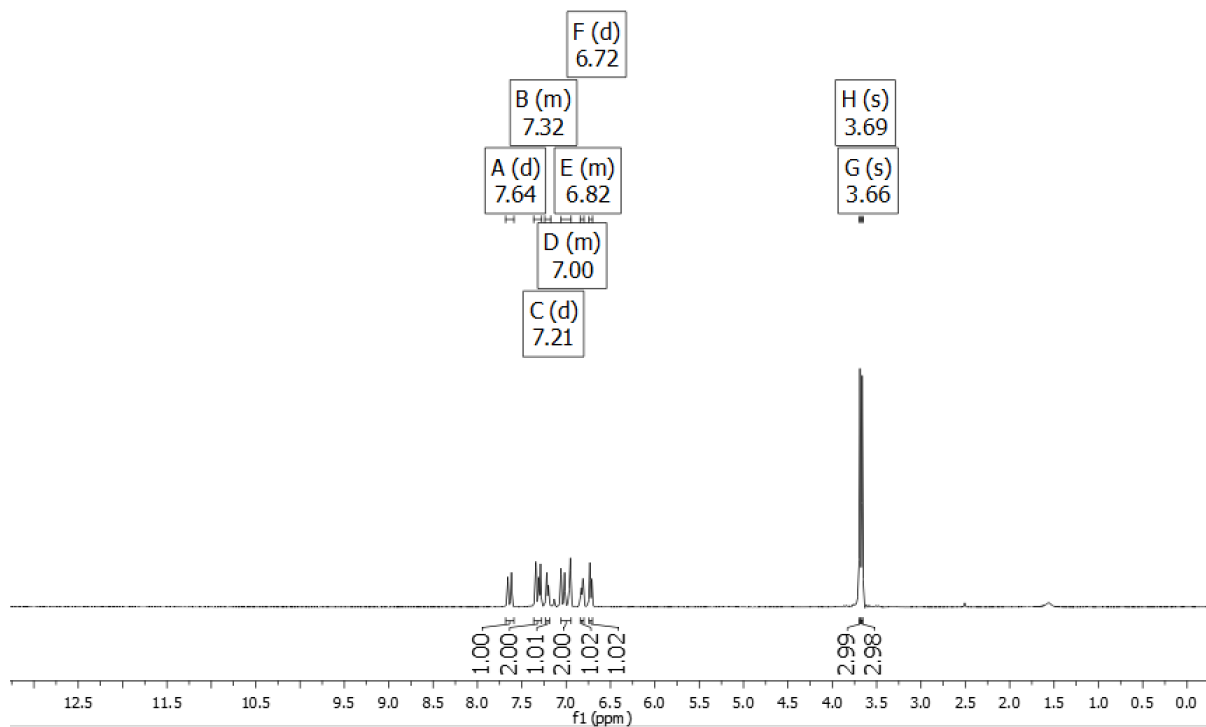

**Figure S55.**  $^1\text{H}$  NMR (400 MHz,  $\text{CDCl}_3$ ) spectrum of compound **19**.

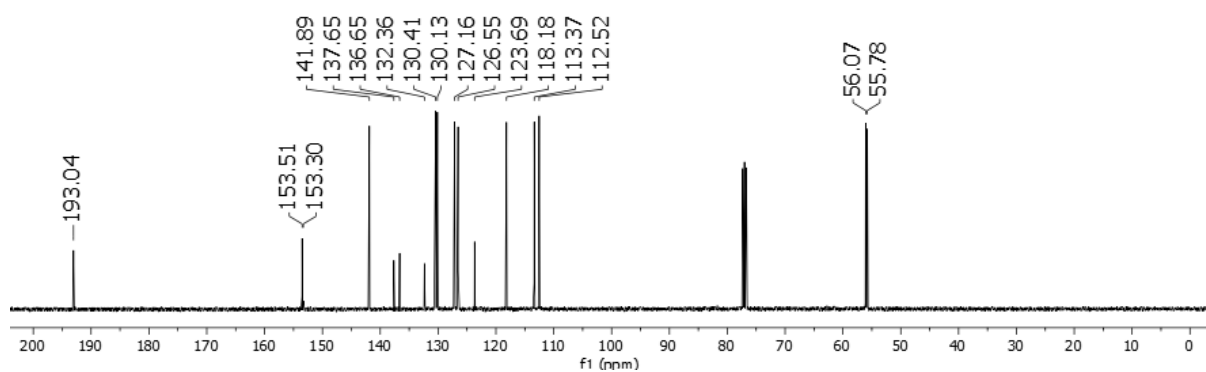

**Figure S56.**  $^{13}\text{C}$  NMR (101 MHz,  $\text{CDCl}_3$ ) spectrum of compound **19**.

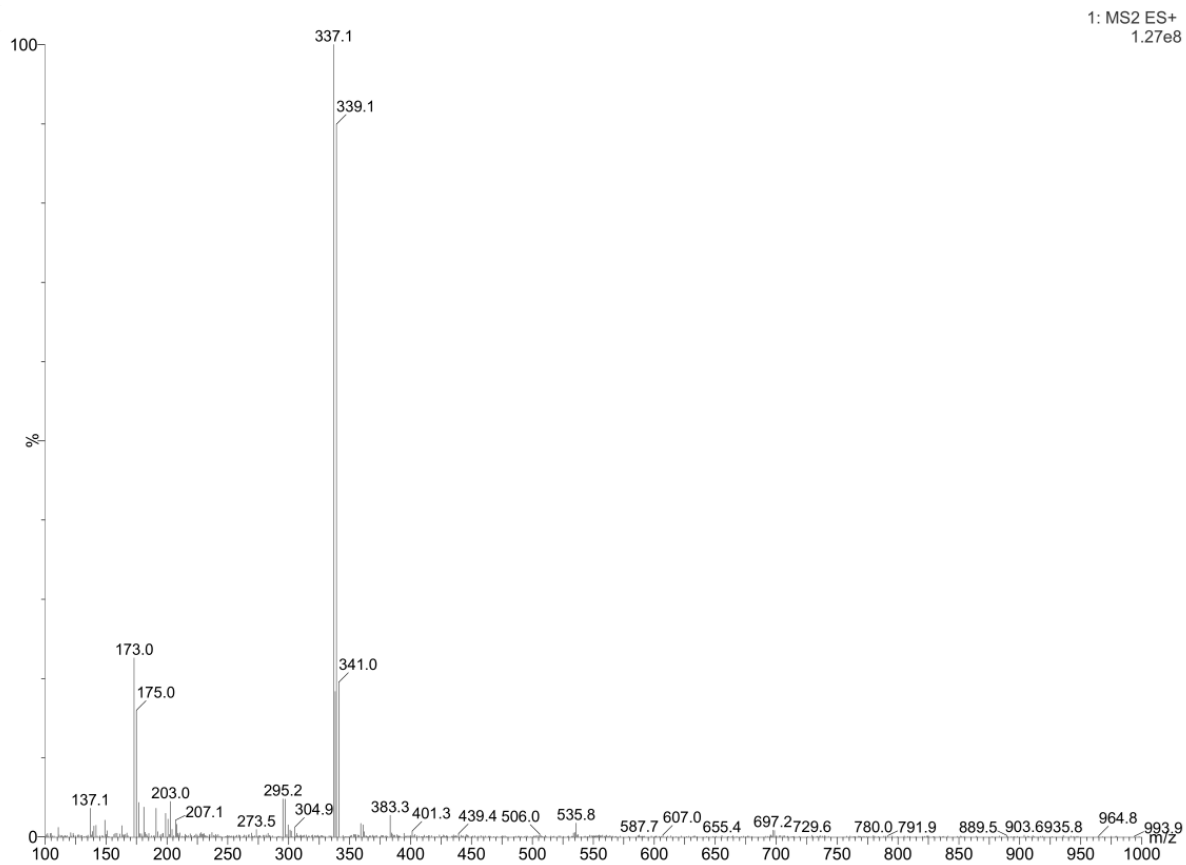

**Figure S57.** Mass spectrum of compound **19**.

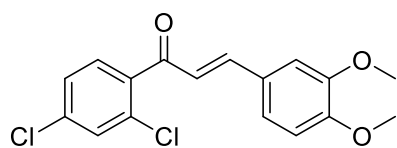

20

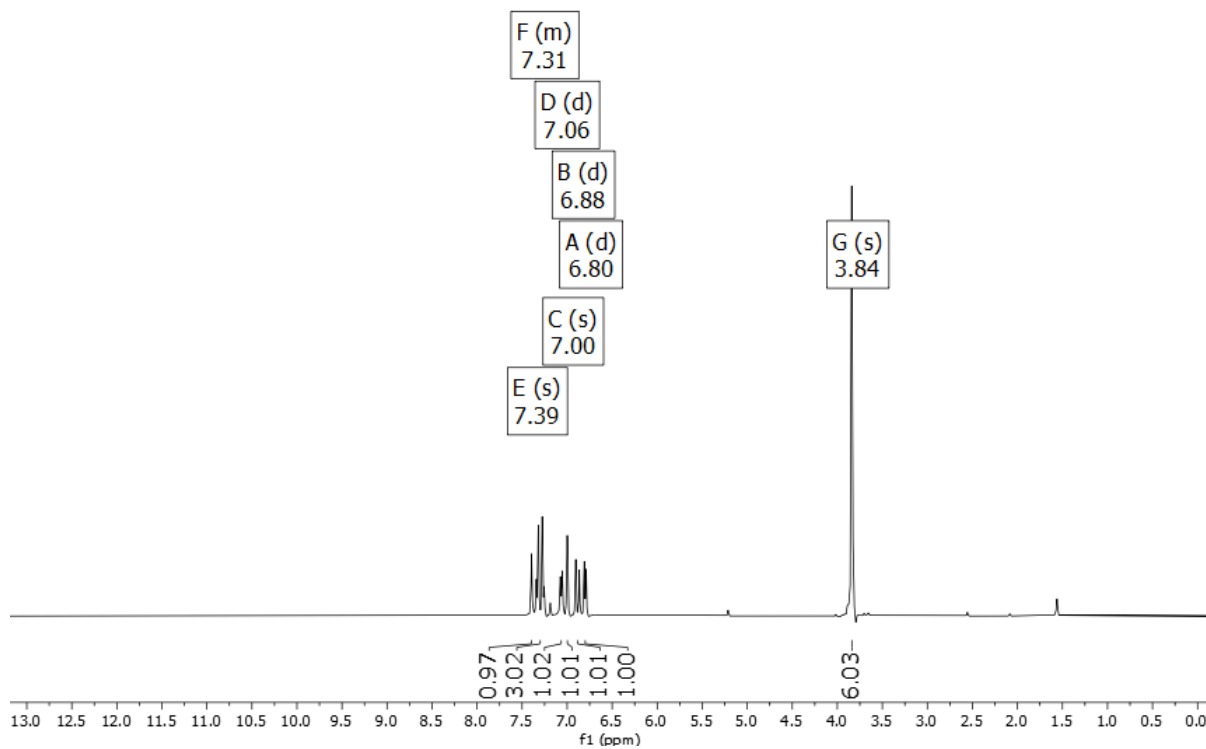

Figure S58. <sup>1</sup>H NMR (400 MHz, CDCl<sub>3</sub>) spectrum of compound 20.

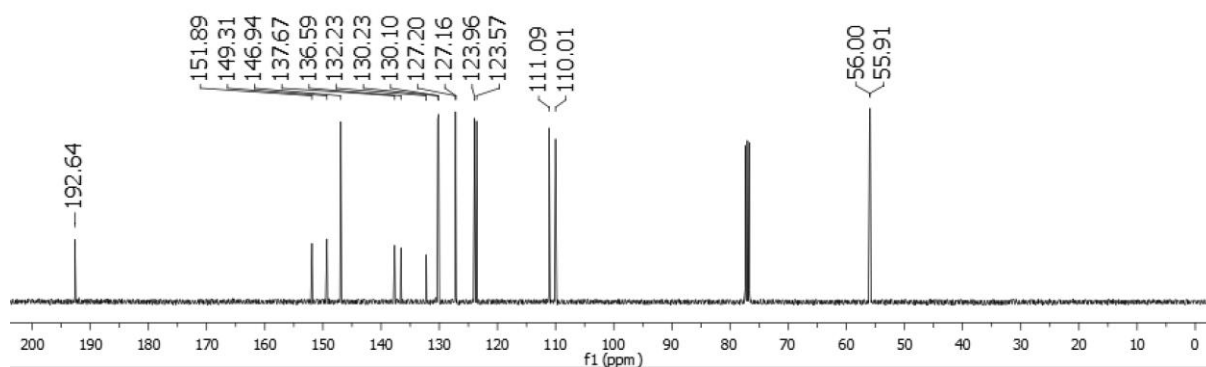

Figure S59. <sup>13</sup>C NMR (101 MHz, CDCl<sub>3</sub>) spectrum of compound 20.

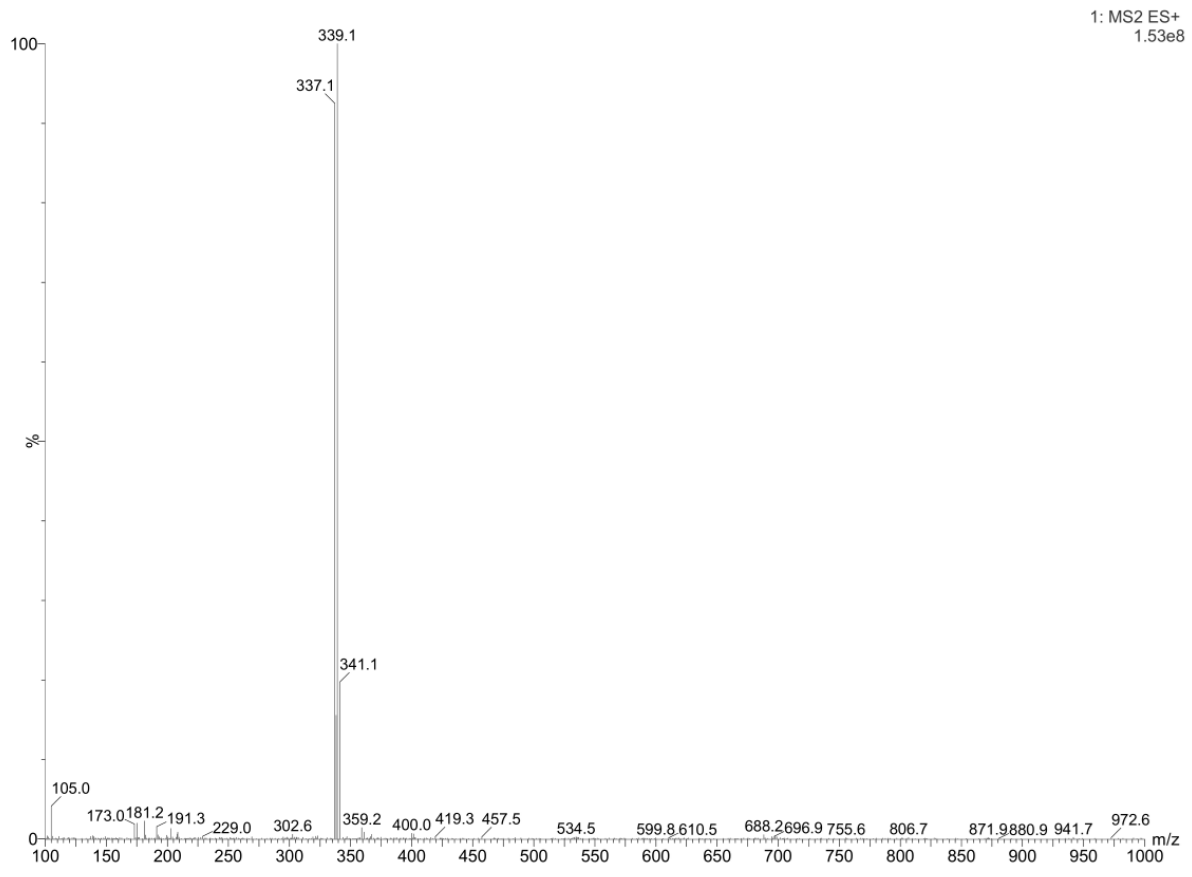

**Figure S60.** Mass spectrum of compound **20**.

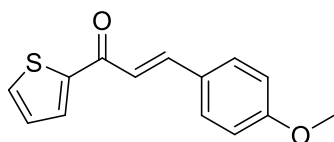

**21**

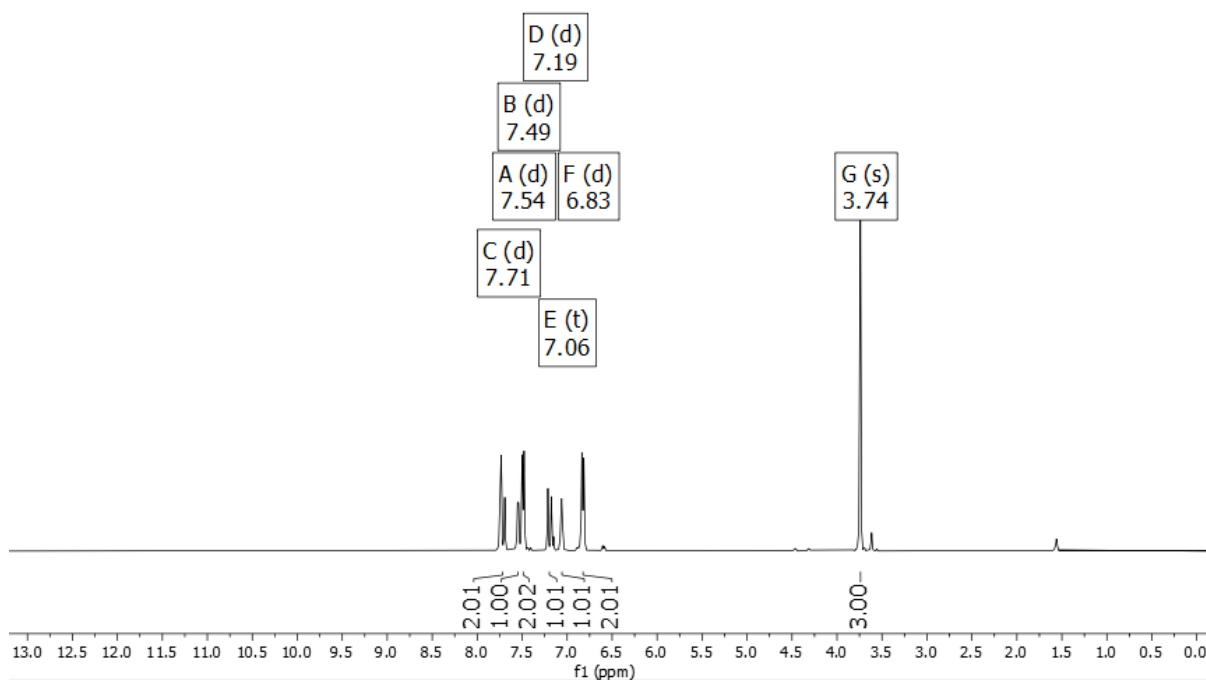

**Figure S61.**  $^1\text{H}$  NMR (400 MHz,  $\text{CDCl}_3$ ) spectrum of compound **21**.

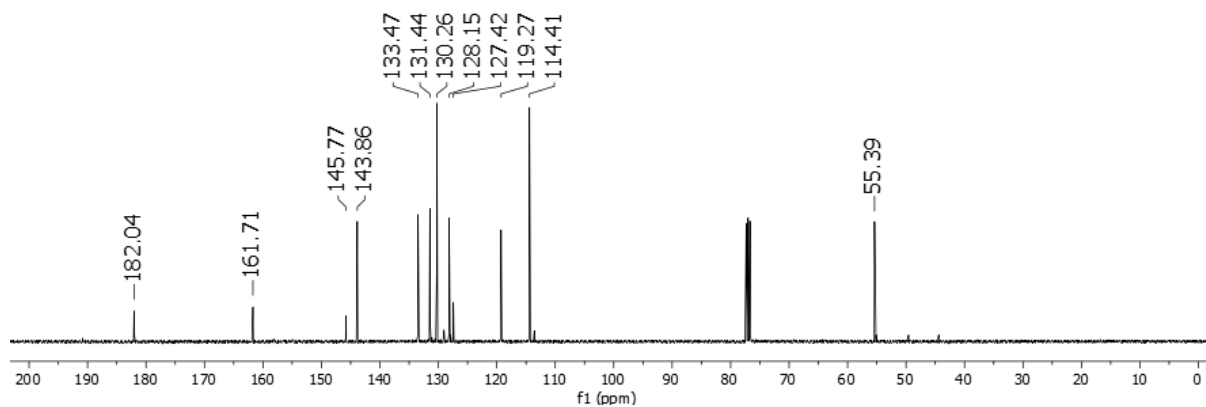

**Figure S62.**  $^{13}\text{C}$  NMR (101 MHz,  $\text{CDCl}_3$ ) spectrum of compound **21**.

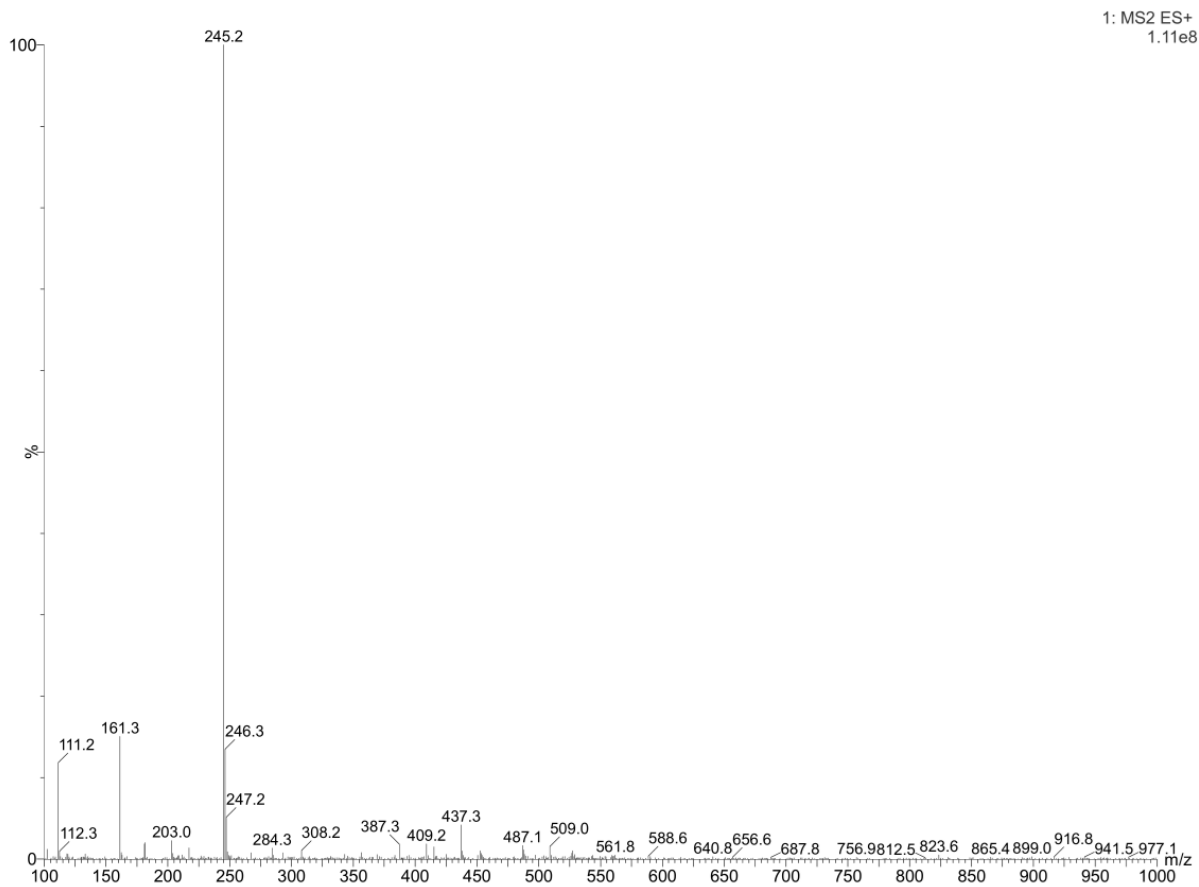

**Figure S63.** Mass spectrum of compound **21**.

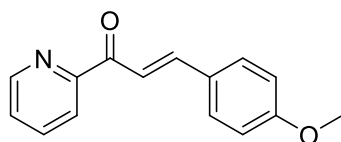

**22**

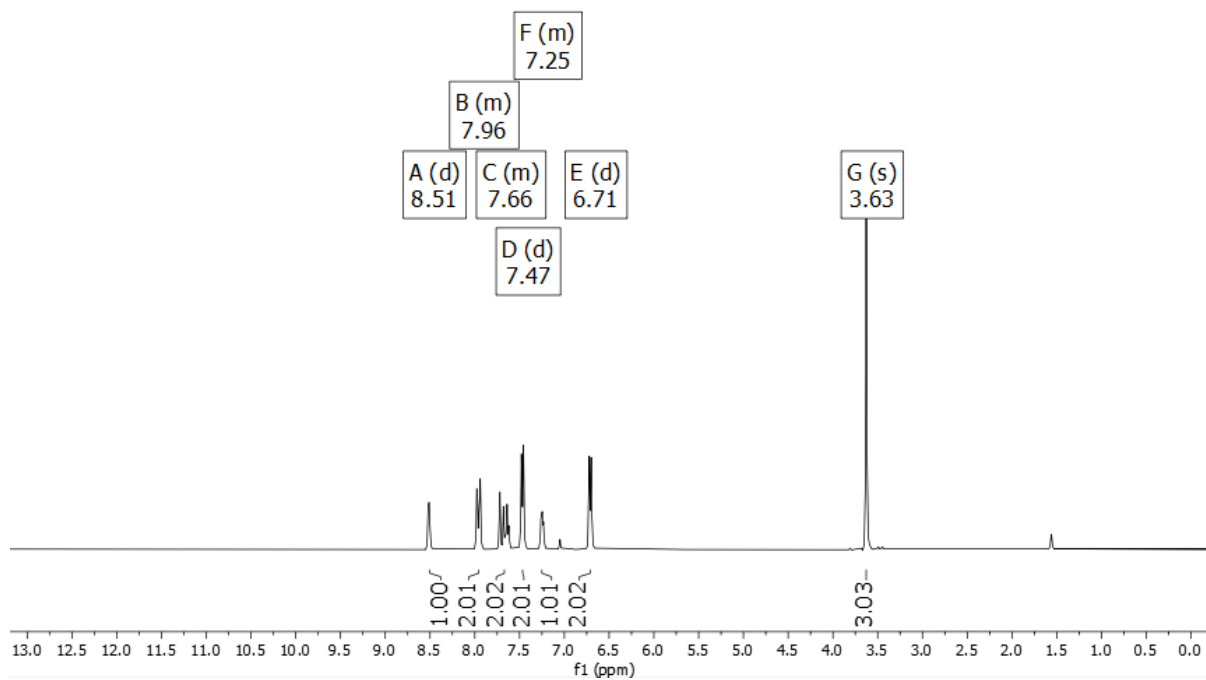

**Figure S64.**  $^1\text{H}$  NMR (400 MHz,  $\text{CDCl}_3$ ) spectrum of compound **22**.

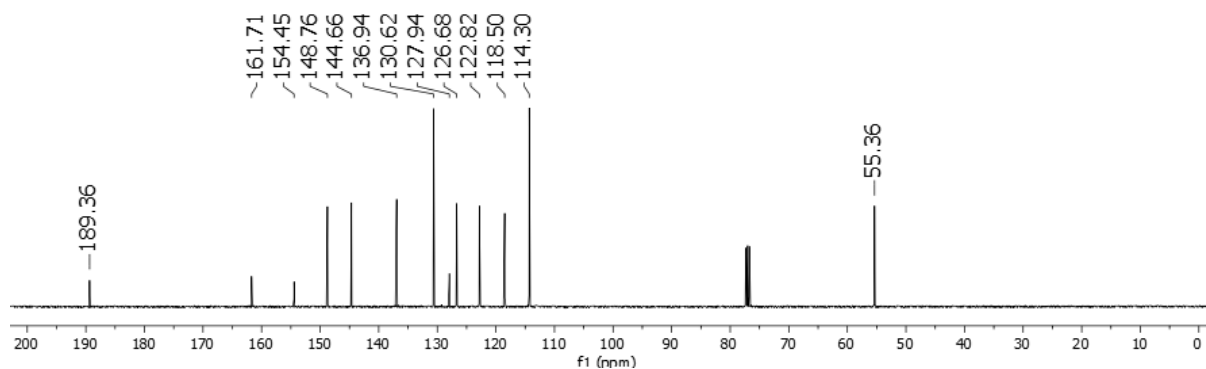

**Figure S65.**  $^{13}\text{C}$  NMR (101 MHz,  $\text{CDCl}_3$ ) spectrum of compound **22**.

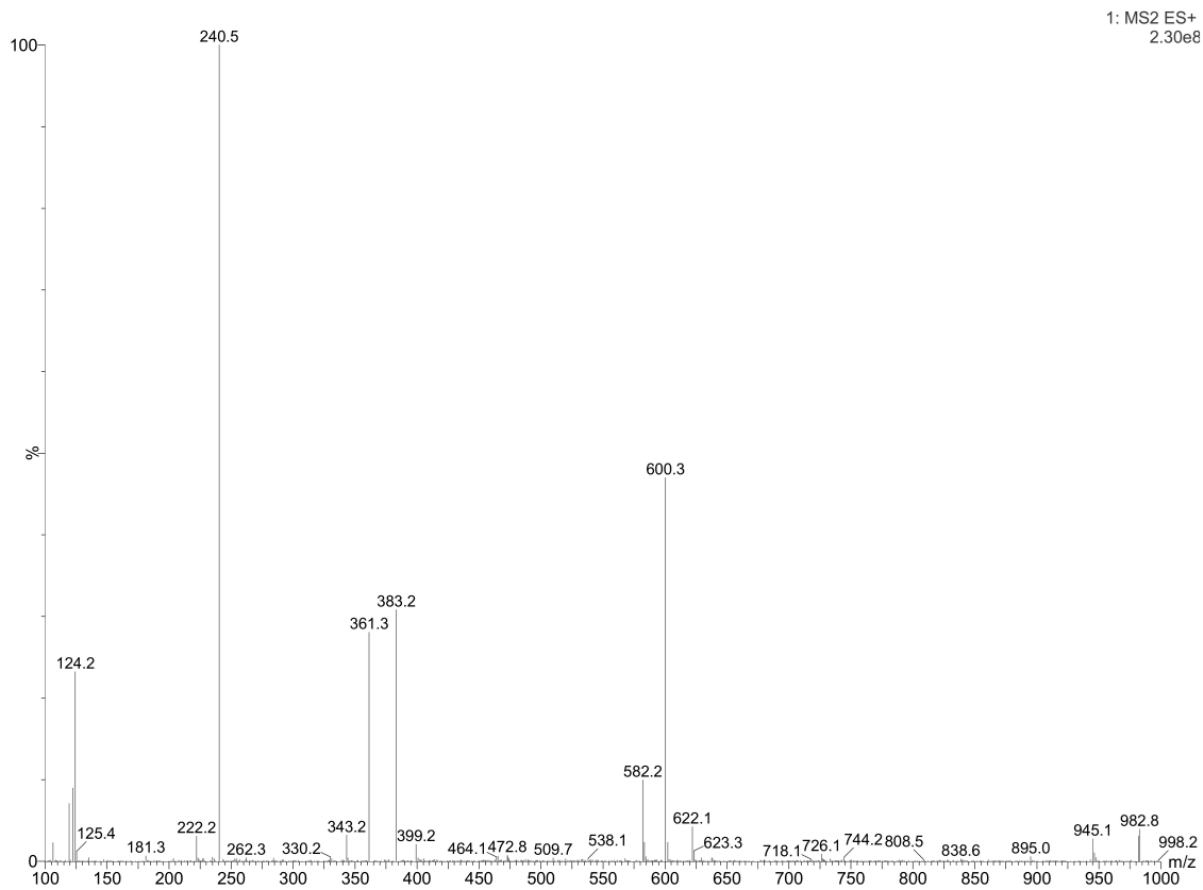

**Figure S66.** Mass spectrum of compound **22**.

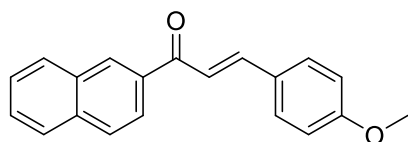

**23**

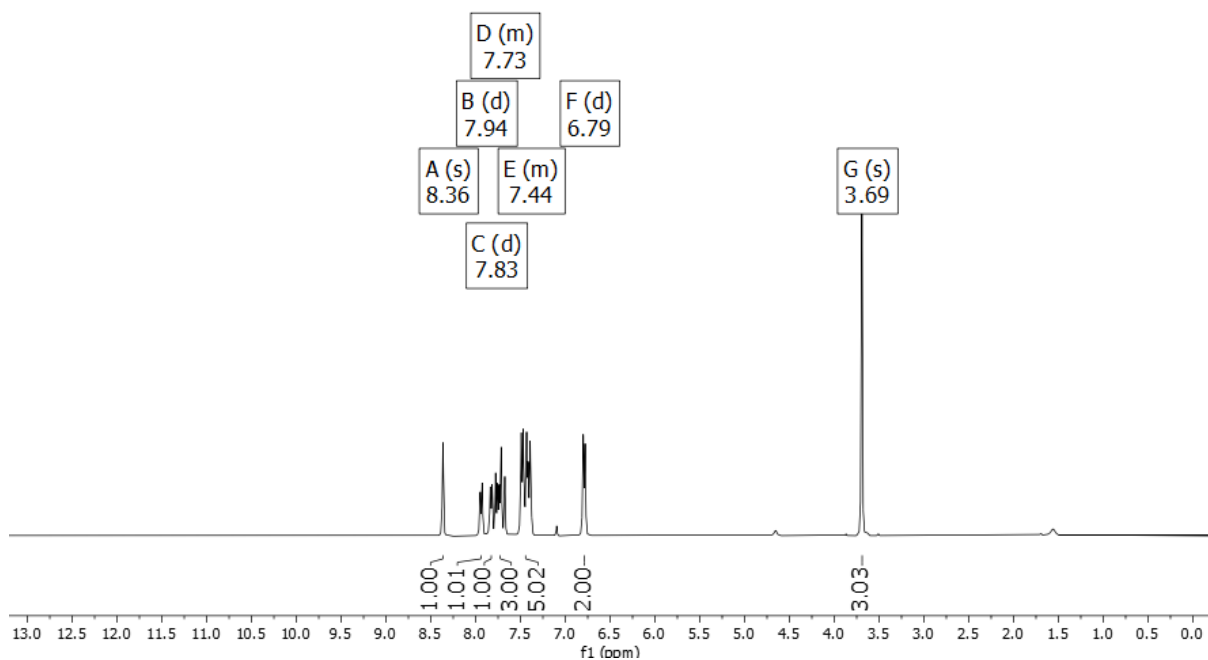

**Figure S67.**  $^1\text{H}$  NMR (400 MHz,  $\text{CDCl}_3$ ) spectrum of compound **23**.

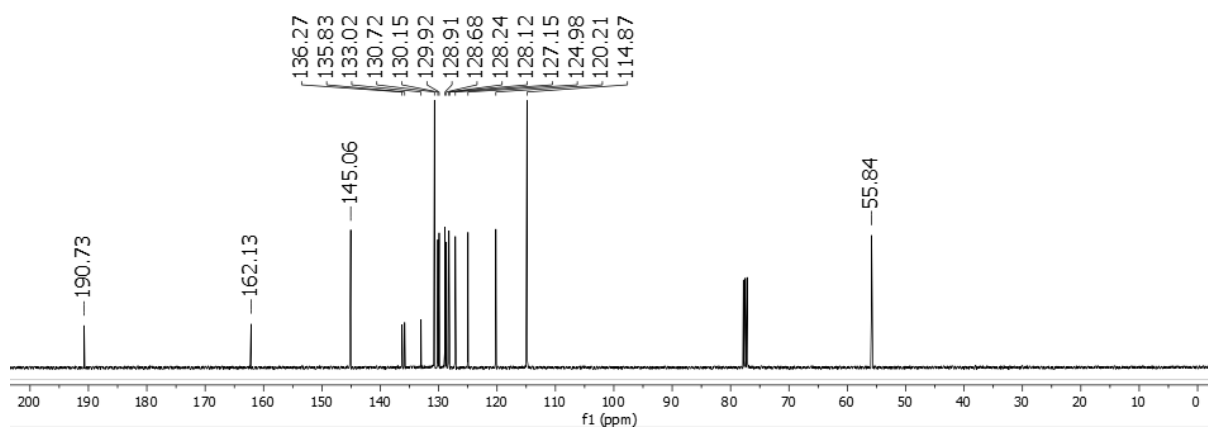

**Figure S68.**  $^{13}\text{C}$  NMR (101 MHz,  $\text{CDCl}_3$ ) spectrum of compound **23**.

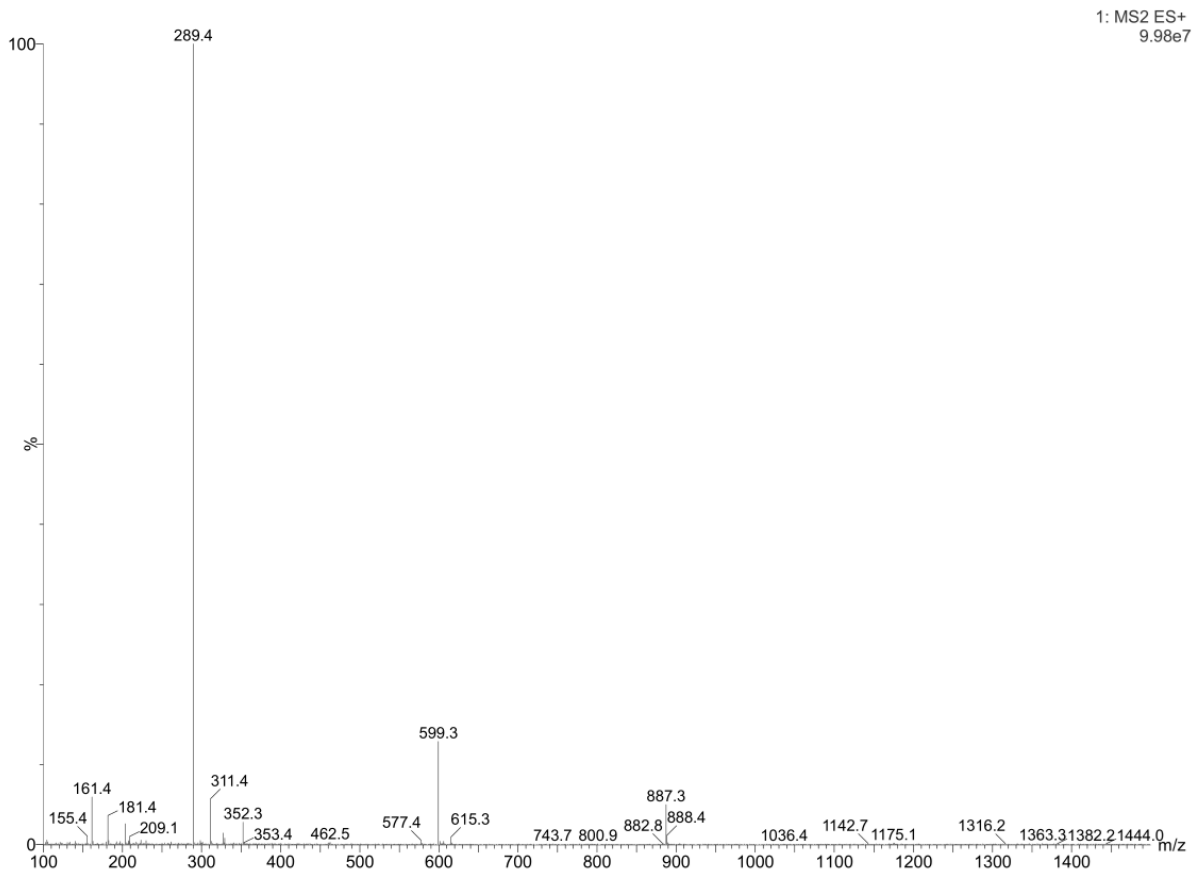

**Figure S69.** Mass spectrum of compound **23**.

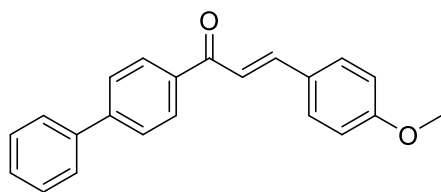

24

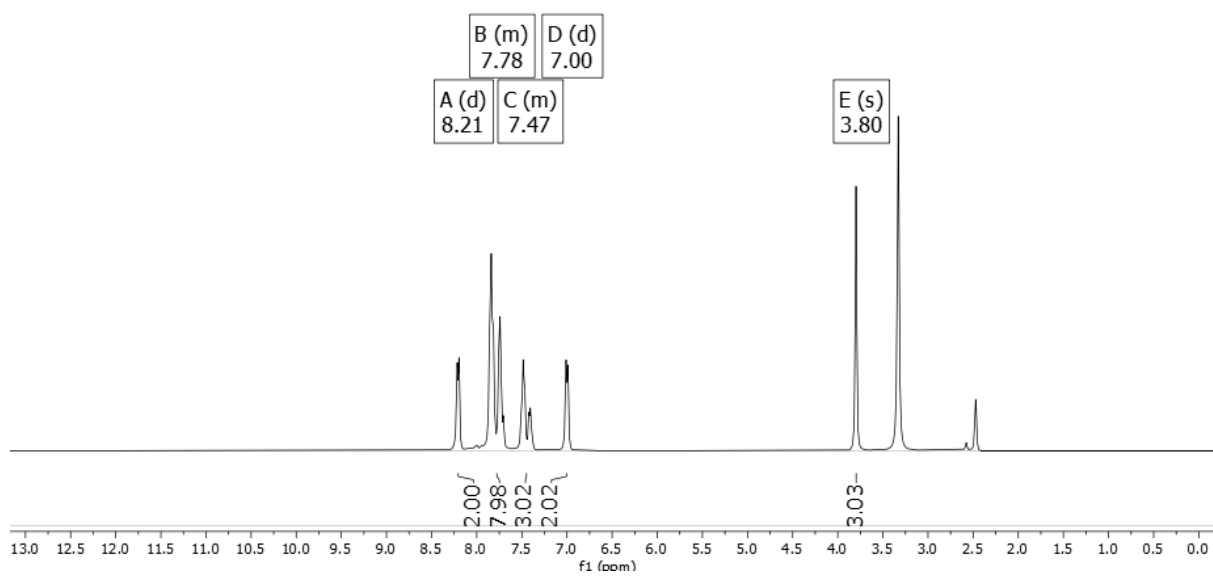

Figure S70. <sup>1</sup>H NMR (400 MHz, DMSO-*d*<sub>6</sub>) spectrum of compound 24.

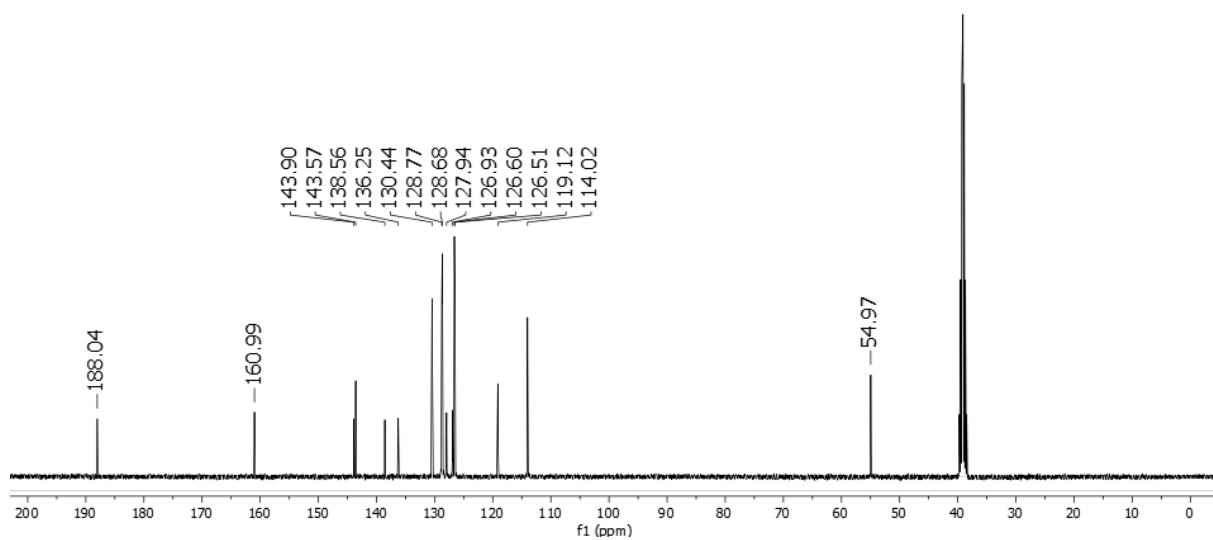

Figure S71. <sup>13</sup>C NMR (101 MHz, DMSO-*d*<sub>6</sub>) spectrum of compound 24.

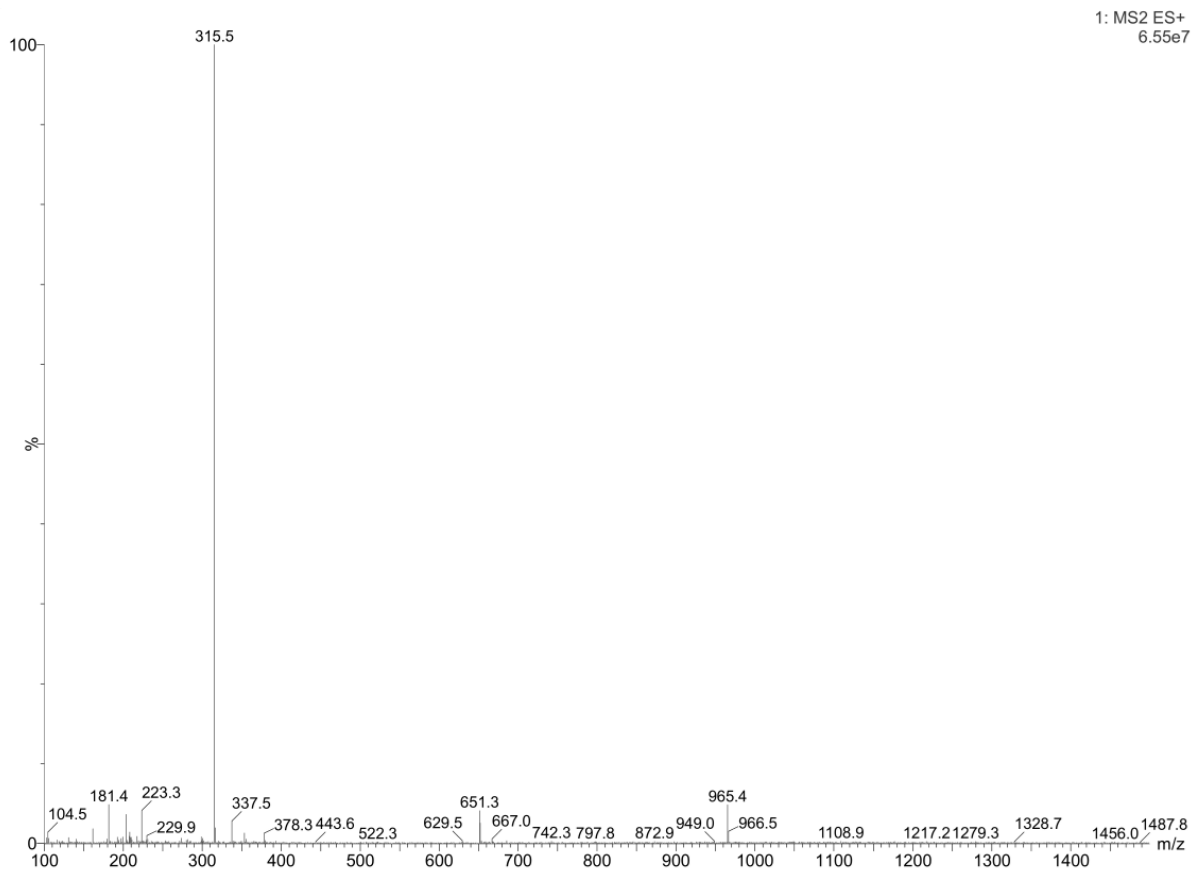

**Figure S72.** Mass spectrum of compound **24**.

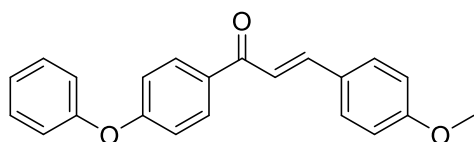

**25**

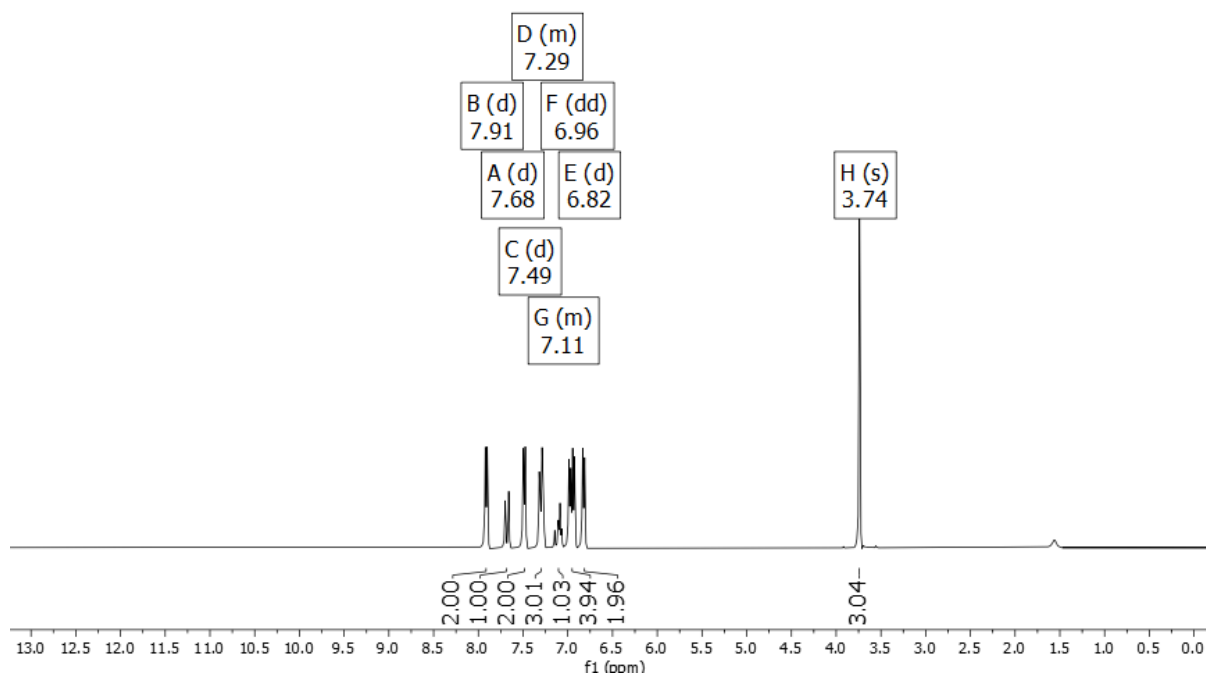

**Figure S73.**  $^1\text{H}$  NMR (400 MHz,  $\text{CDCl}_3$ ) spectrum of compound **25**.

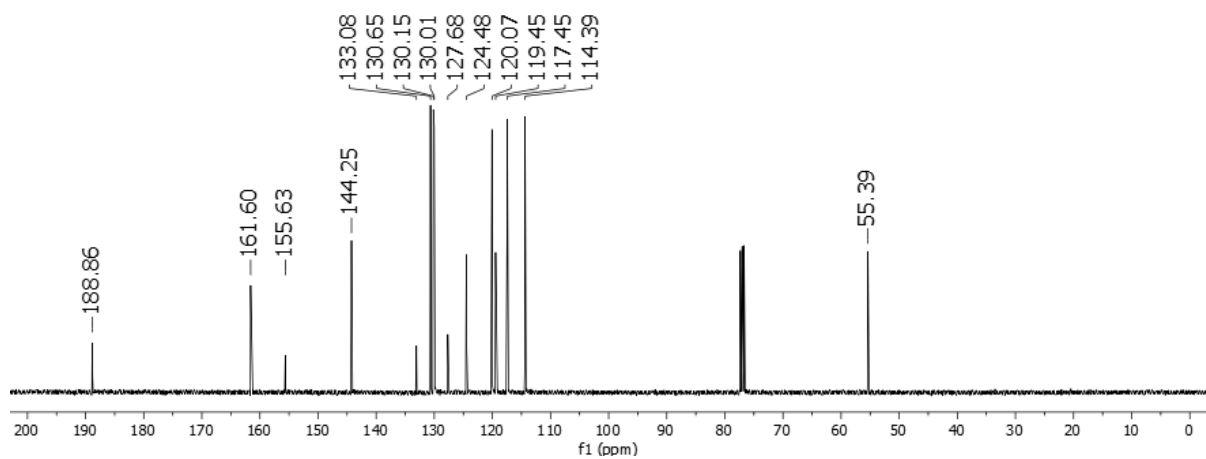

**Figure S74.**  $^{13}\text{C}$  NMR (101 MHz,  $\text{CDCl}_3$ ) spectrum of compound **25**.

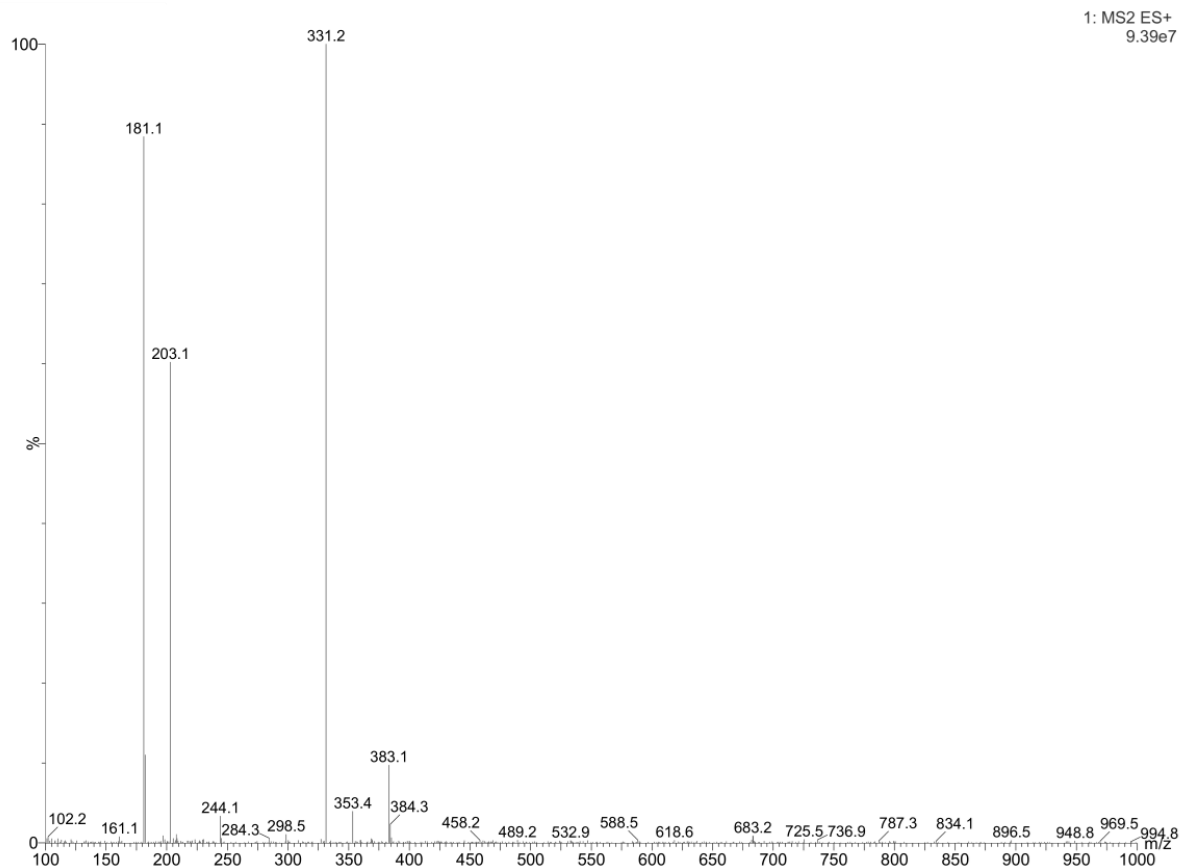

**Figure S75.** Mass spectrum of compound **25**.

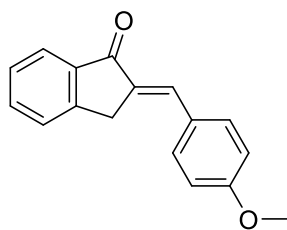

26

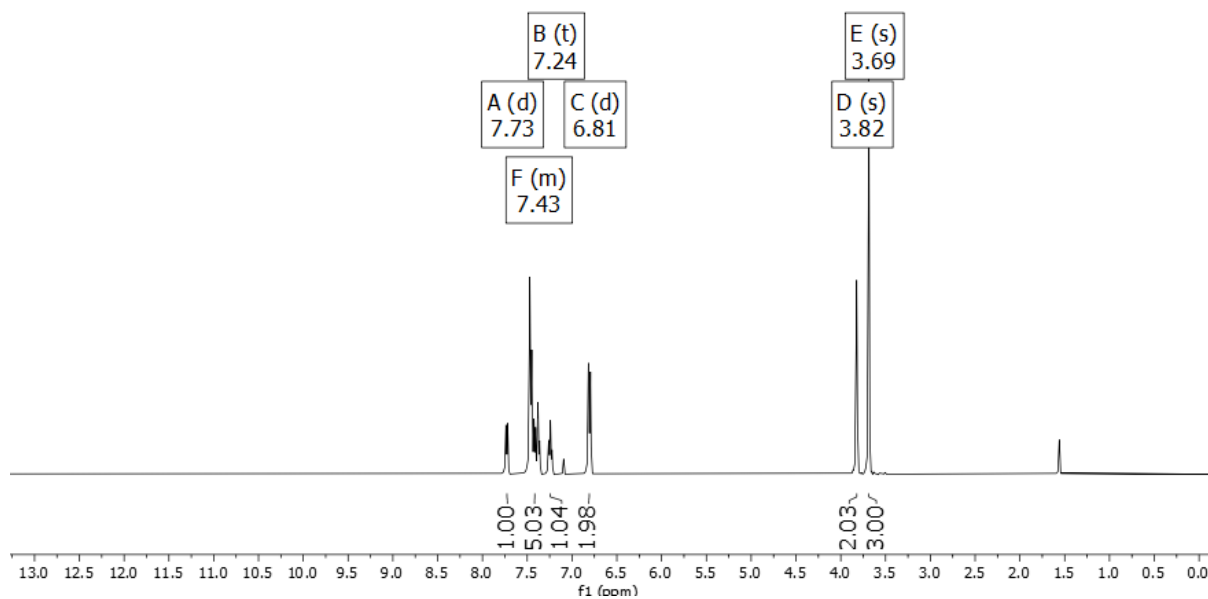

Figure S76.  $^1\text{H}$  NMR (400 MHz,  $\text{CDCl}_3$ ) spectrum of compound 26.

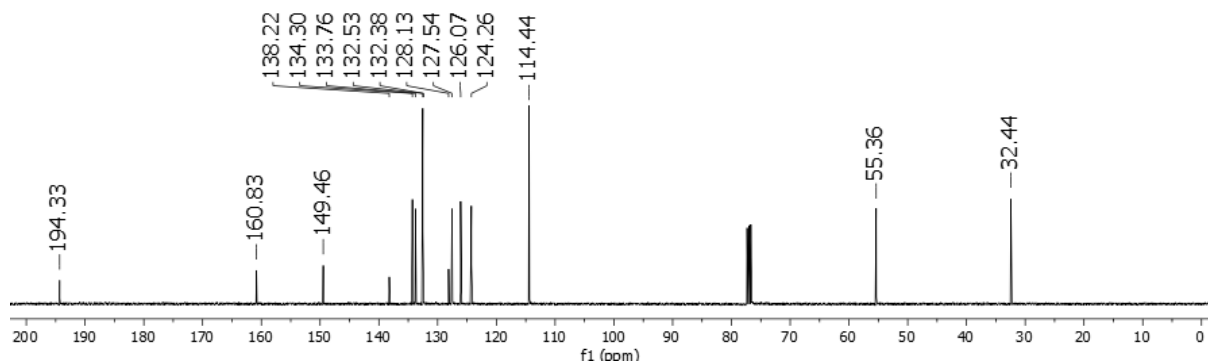

Figure S77.  $^{13}\text{C}$  NMR (101 MHz,  $\text{CDCl}_3$ ) spectrum of compound 26.

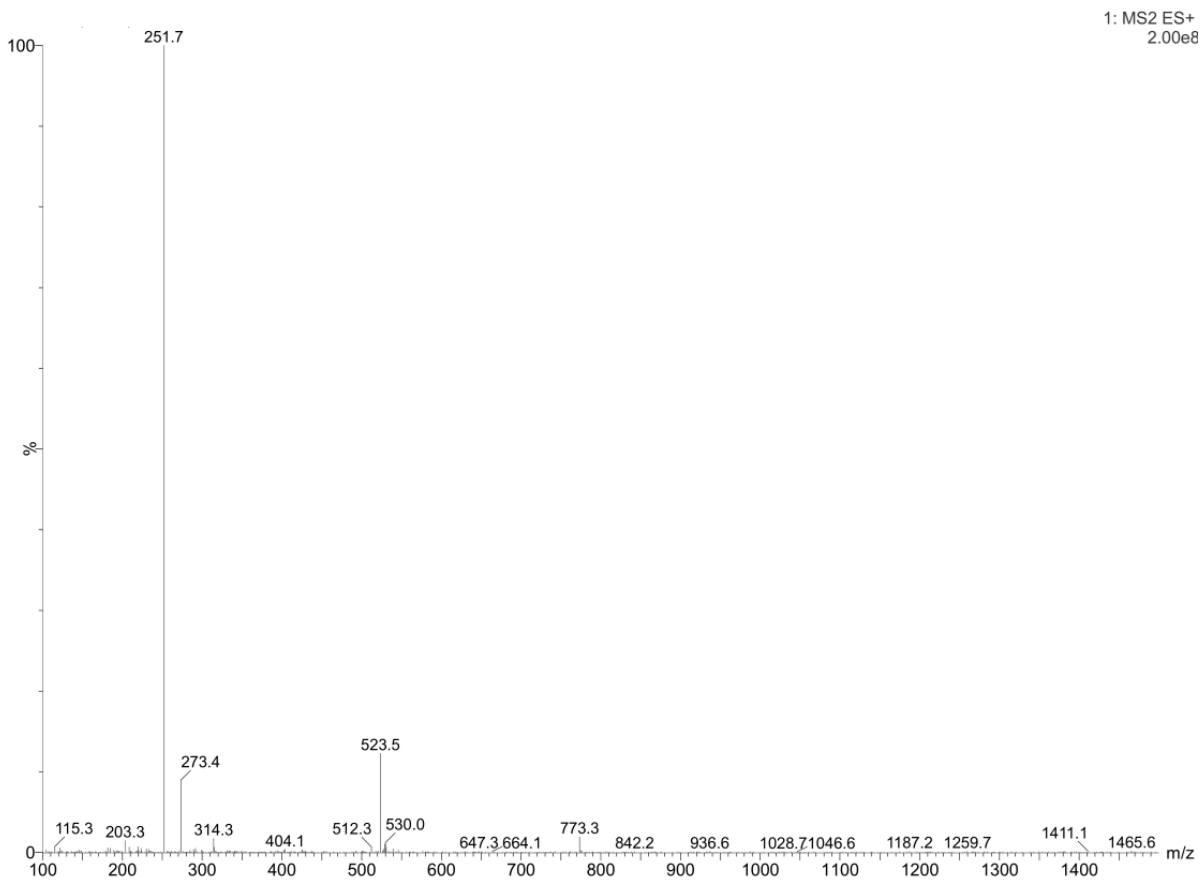

**Figure S78.** Mass spectrum of compound **26**.

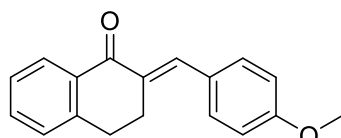

27

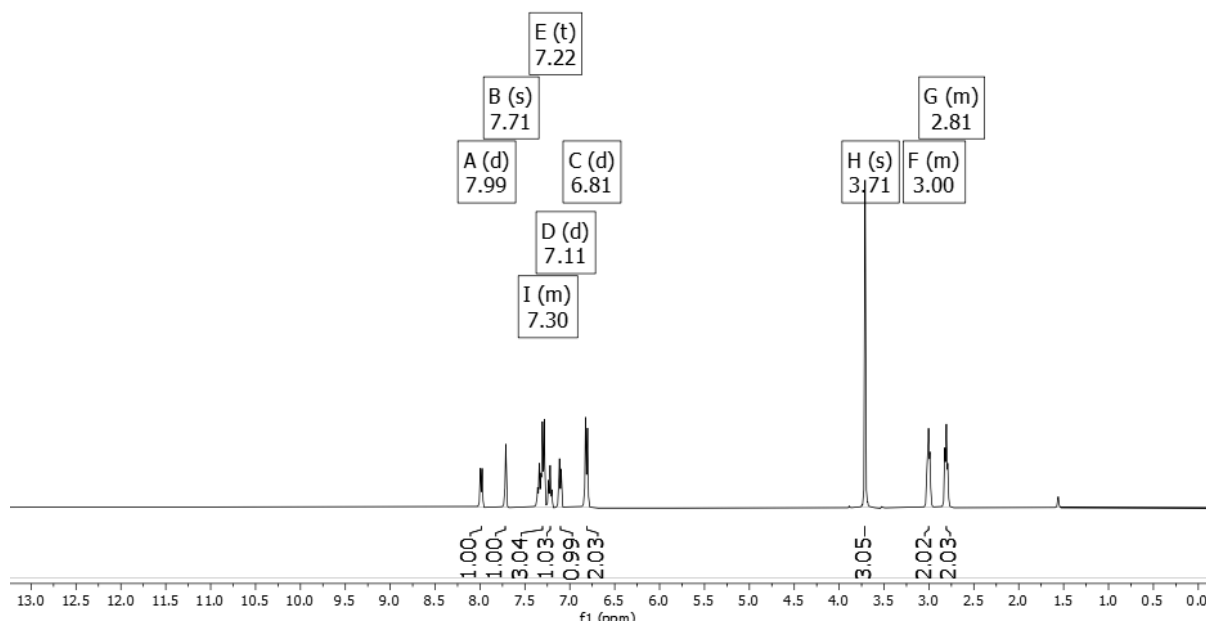

**Figure S79.**  $^1\text{H}$  NMR (400 MHz,  $\text{CDCl}_3$ ) spectrum of compound 27.

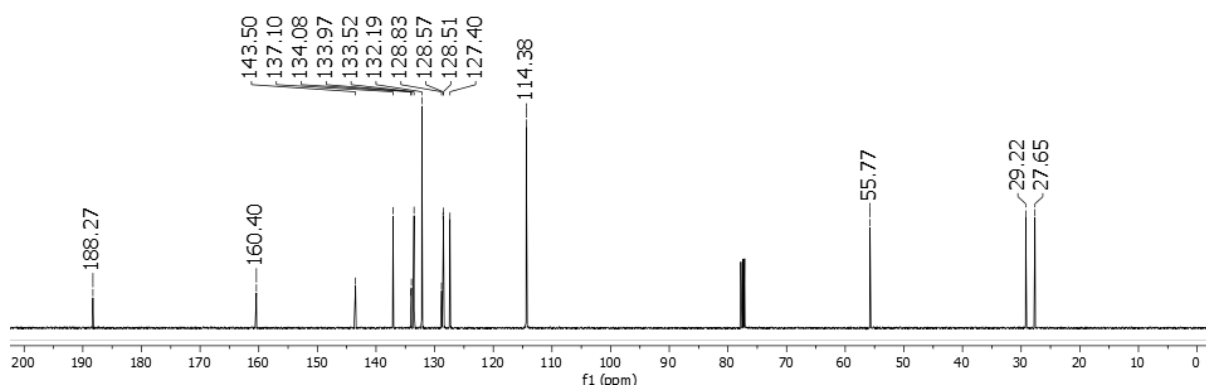

**Figure S80.**  $^{13}\text{C}$  NMR (101 MHz,  $\text{CDCl}_3$ ) spectrum of compound 27.

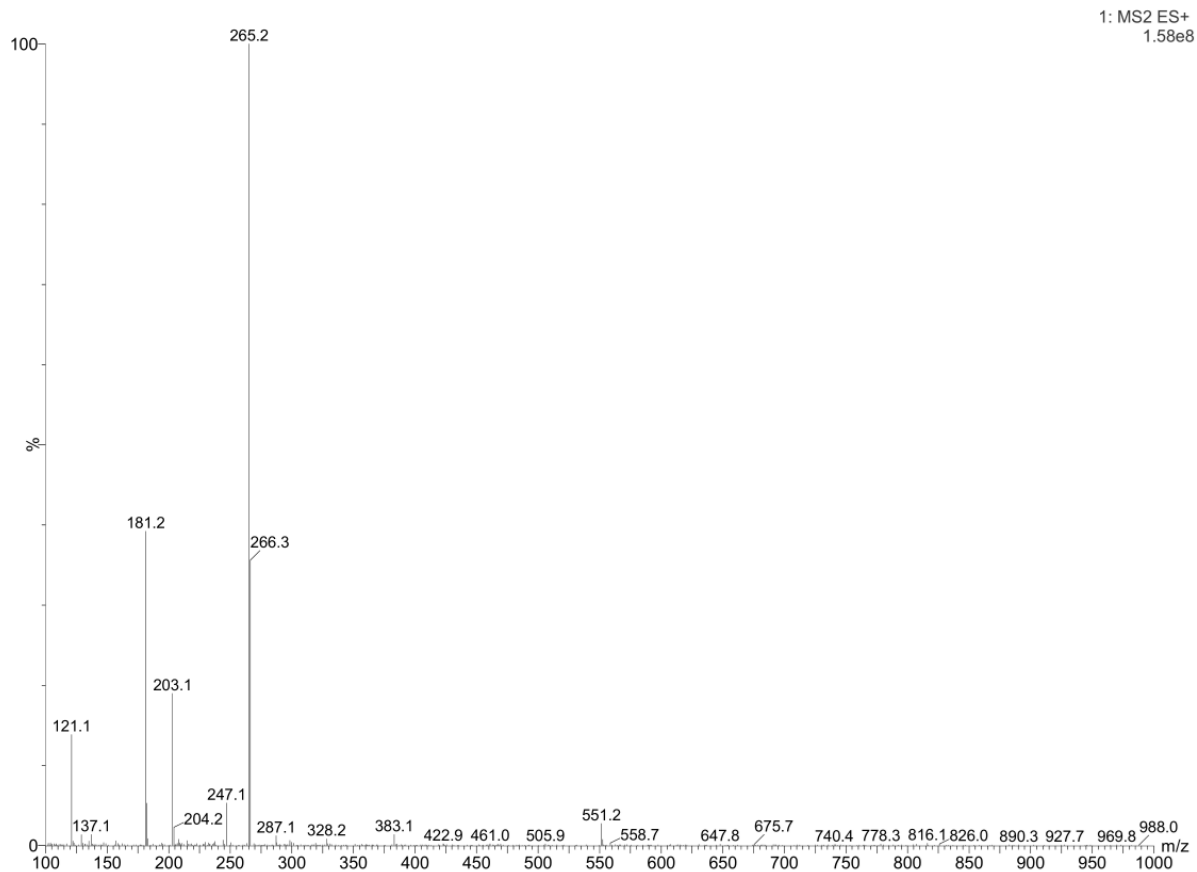

Figure S81. Mass spectrum of compound 27.

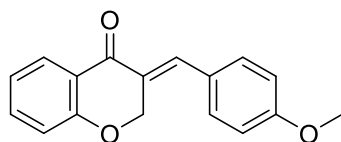

**28**

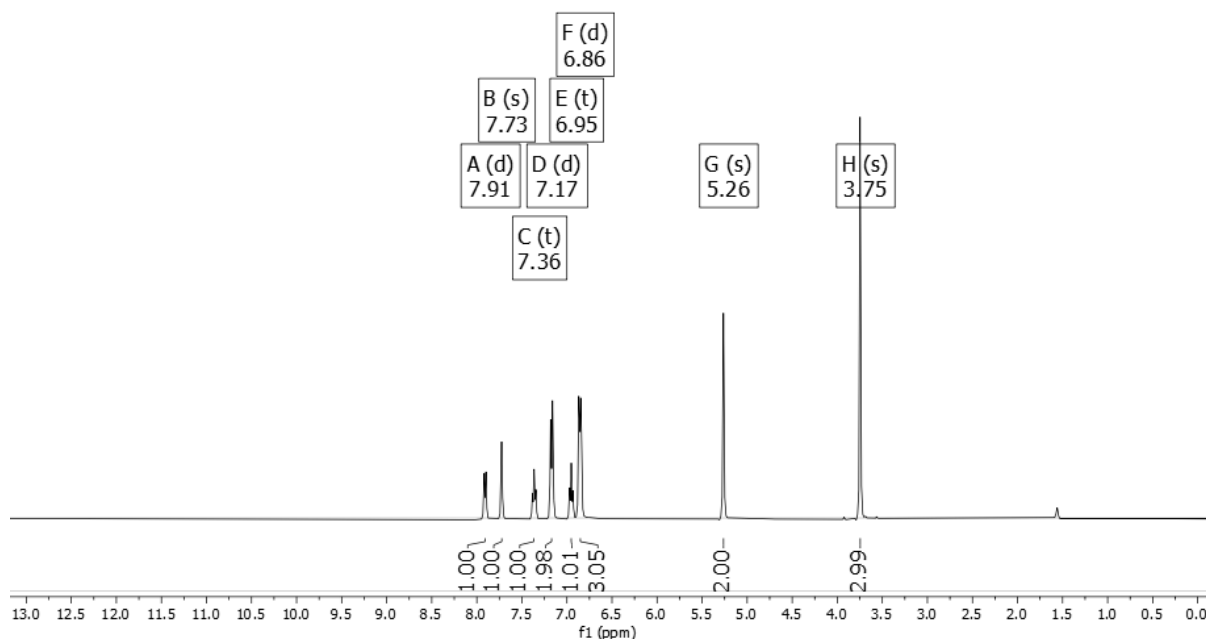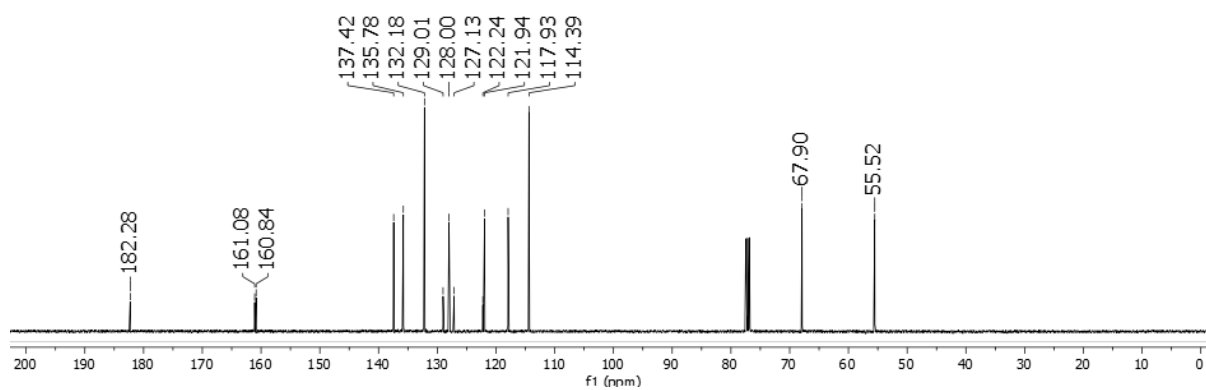

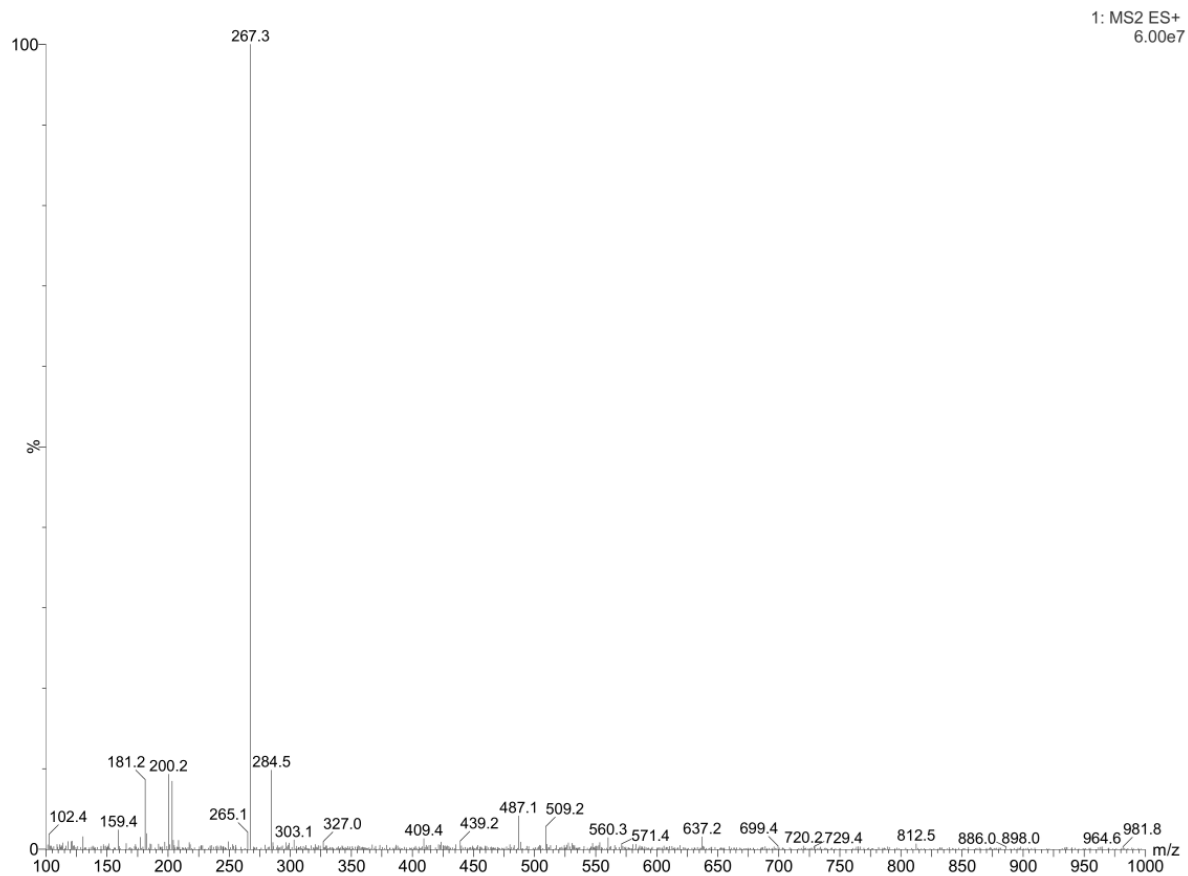

**Figure S84.** Mass spectrum of compound **28**.

## HPLC chromatograms

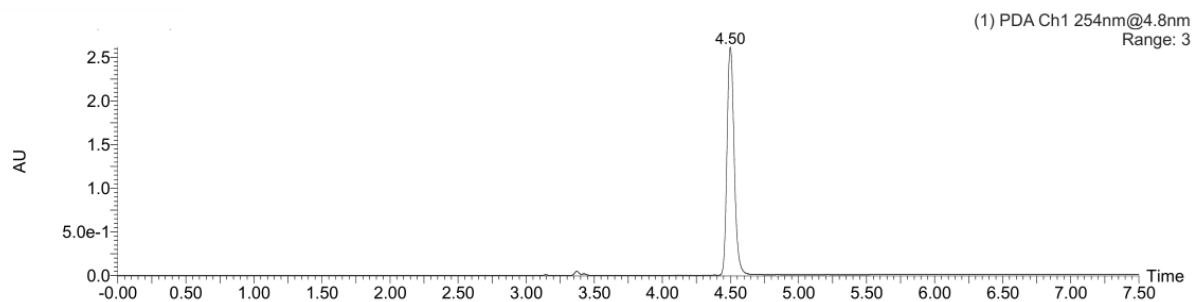

Figure S85. HPLC chromatogram of compound 1.

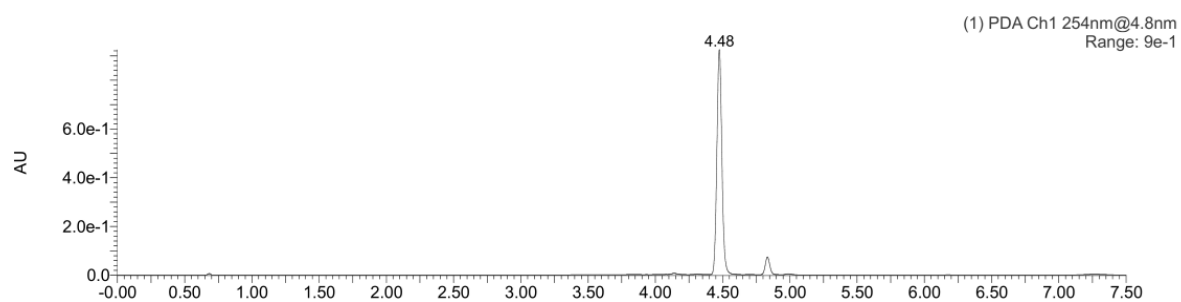

Figure S86. HPLC chromatogram of compound 2.

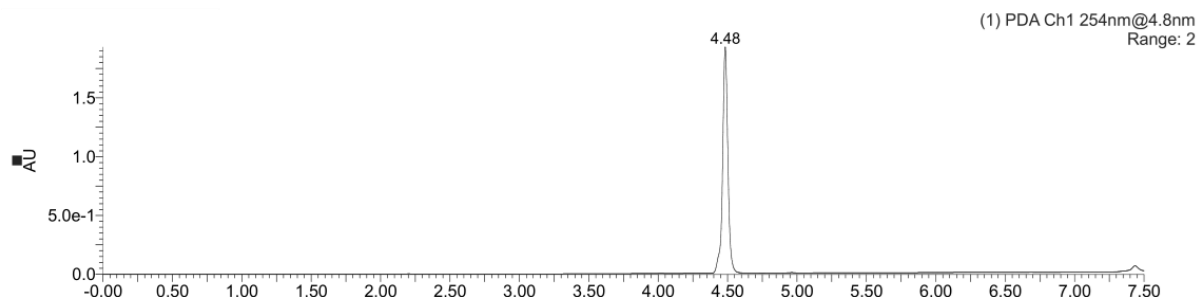

Figure S87. HPLC chromatogram of compound 3.

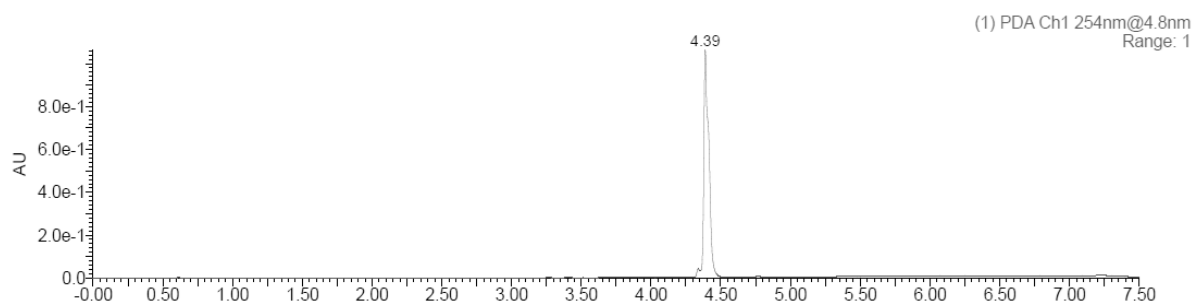

Figure S88. HPLC chromatogram of compound 4.

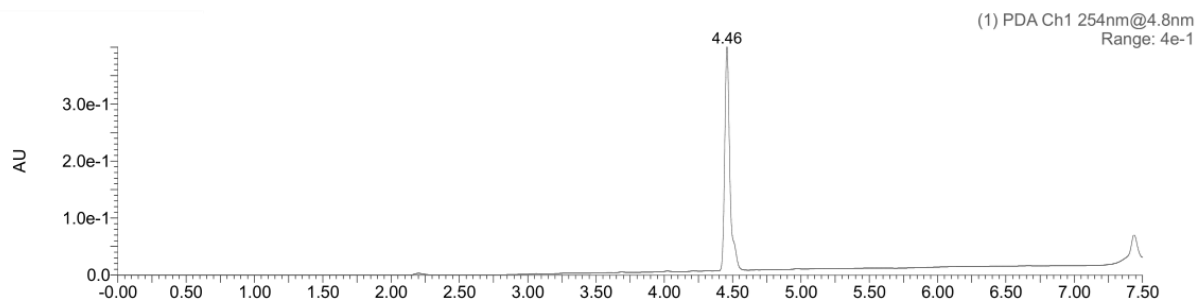

**Figure S89.** HPLC chromatogram of compound **5**.

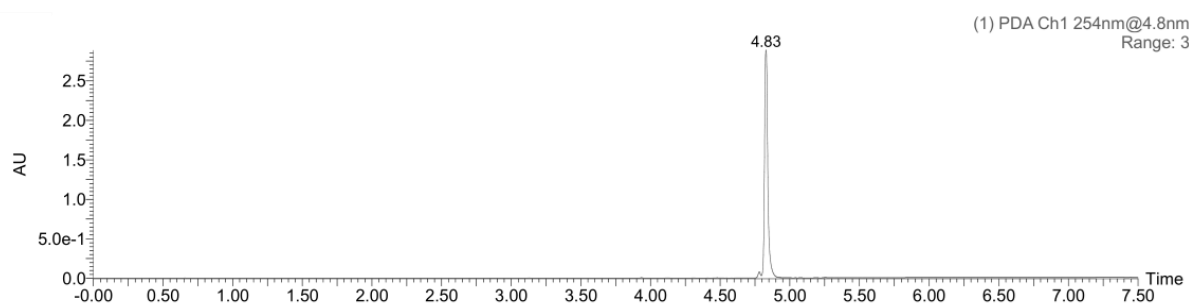

**Figure S90.** HPLC chromatogram of compound **6**.

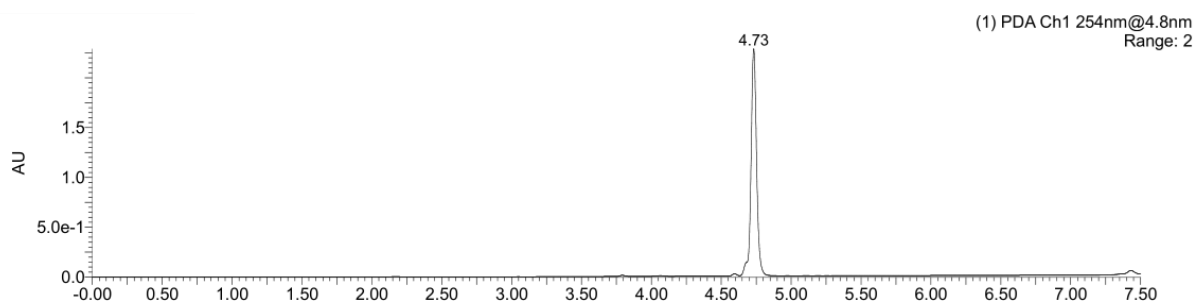

**Figure S91.** HPLC chromatogram of compound **7**.

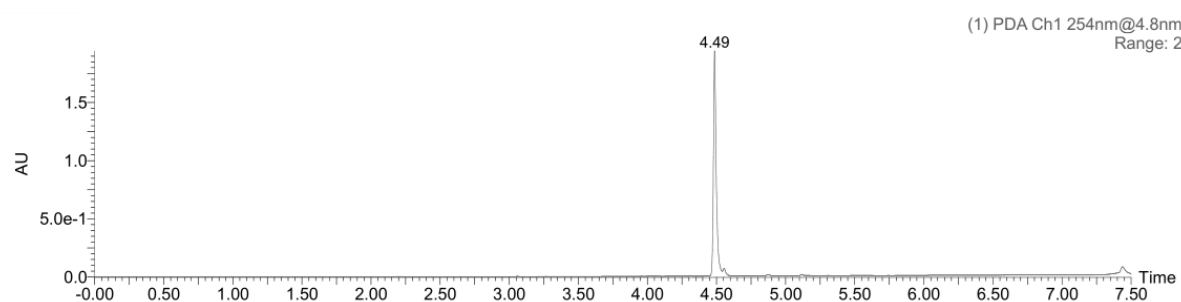

**Figure S92.** HPLC chromatogram of compound **8**.

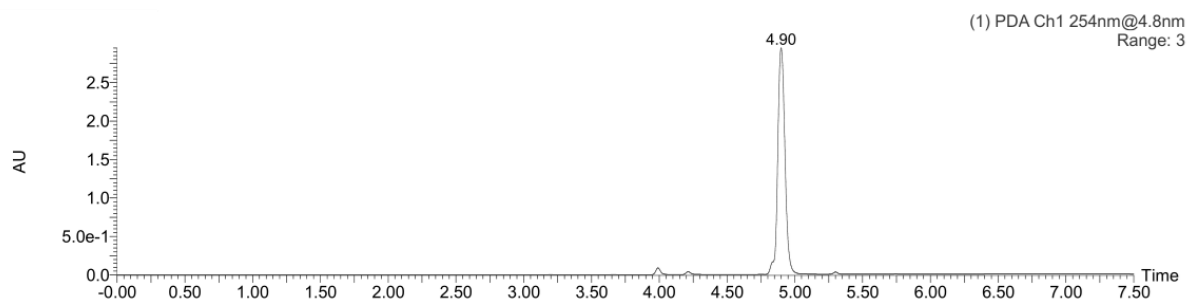

**Figure S93.** HPLC chromatogram of compound **9**.

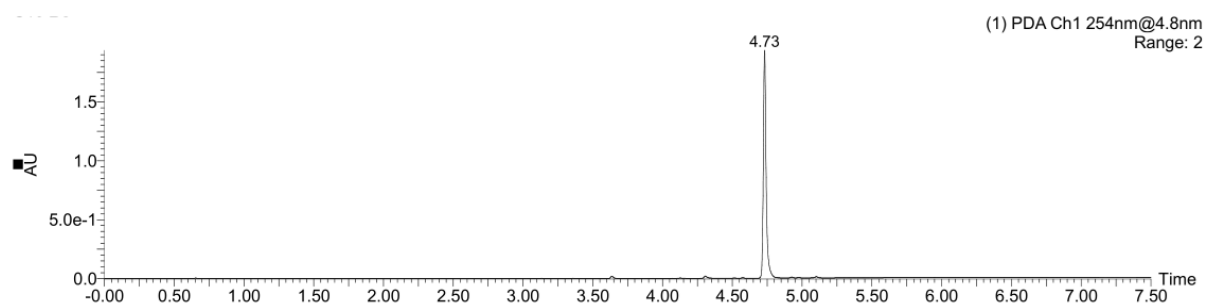

**Figure S94.** HPLC chromatogram of compound **10**.

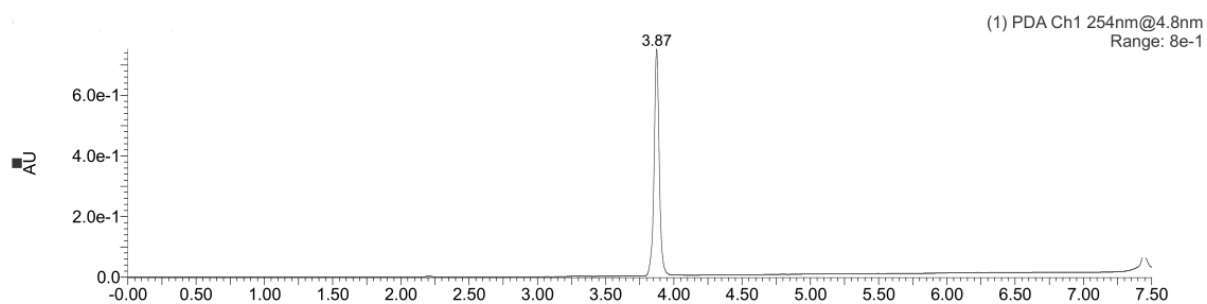

**Figure S95.** HPLC chromatogram of compound **11**.

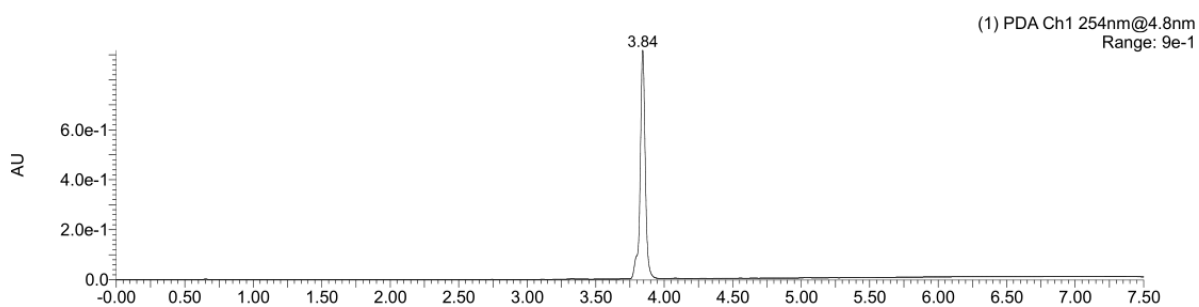

**Figure S96.** HPLC chromatogram of compound **12**.

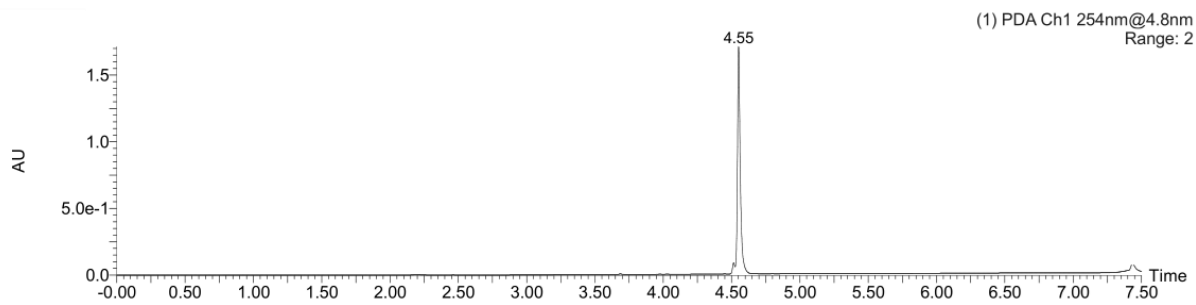

**Figure S97.** HPLC chromatogram of compound **13**.

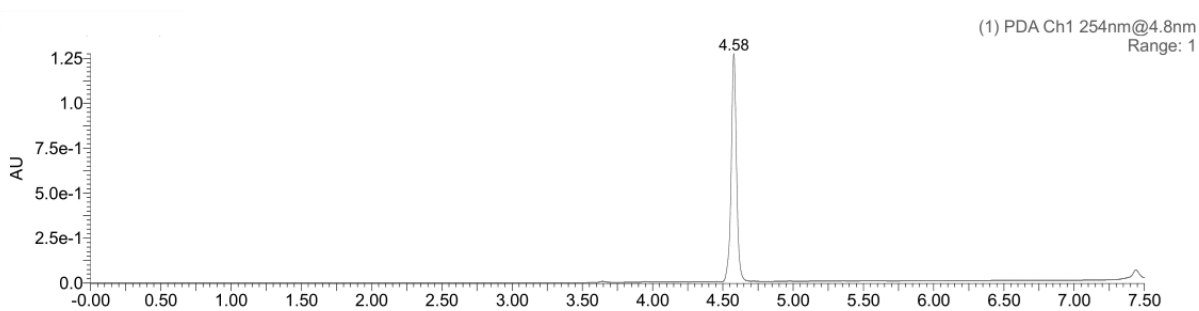

**Figure S98.** HPLC chromatogram of compound **14**.

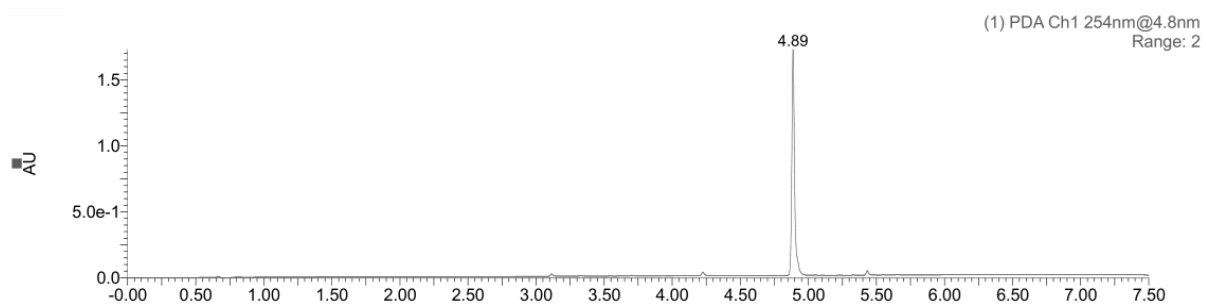

**Figure S99.** HPLC chromatogram of compound **15**.

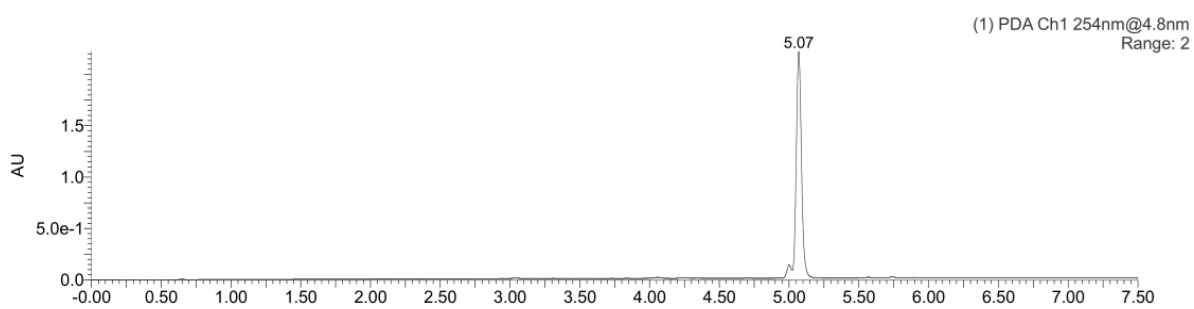

**Figure S100.** HPLC chromatogram of compound **16**.

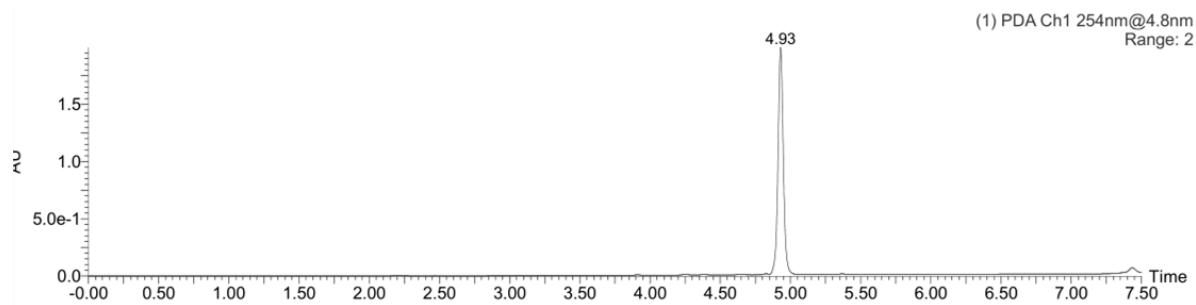

**Figure S101.** HPLC chromatogram of compound 17.

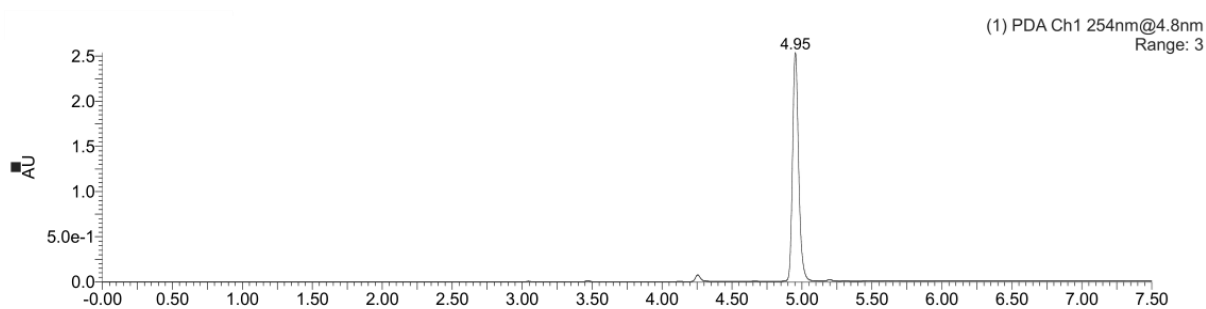

**Figure S102.** HPLC chromatogram of compound 18.

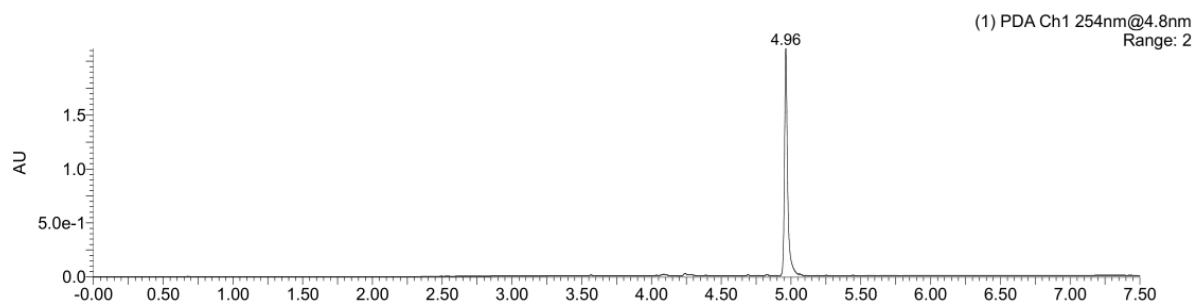

**Figure S103.** HPLC chromatogram of compound 19.

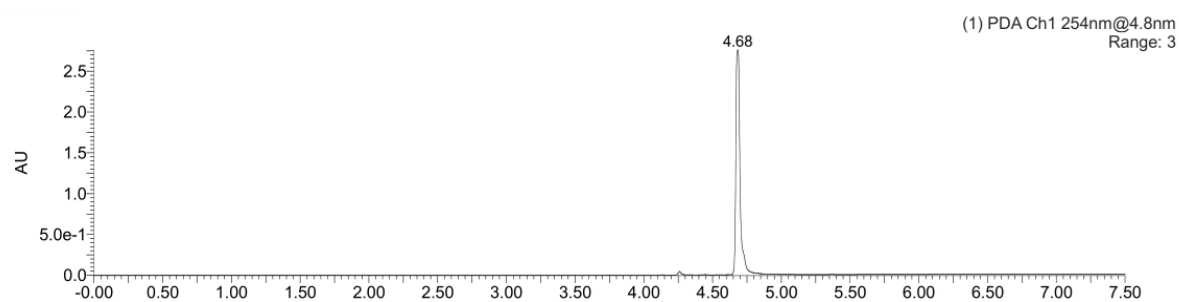

**Figure S104.** HPLC chromatogram of compound 20.

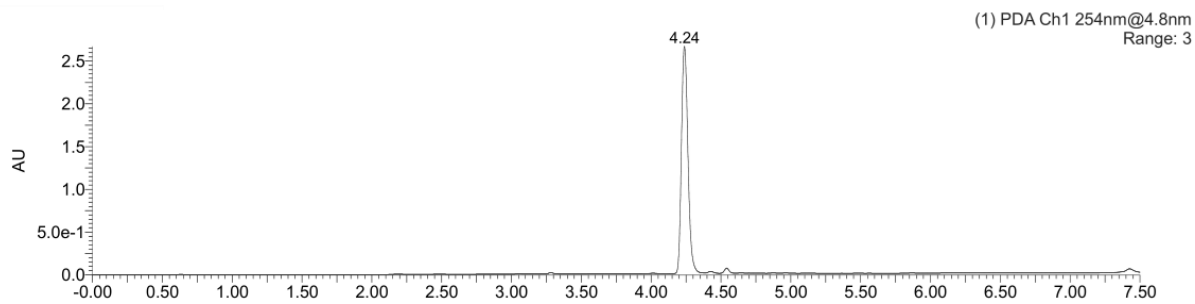

**Figure S105.** HPLC chromatogram of compound **21**.

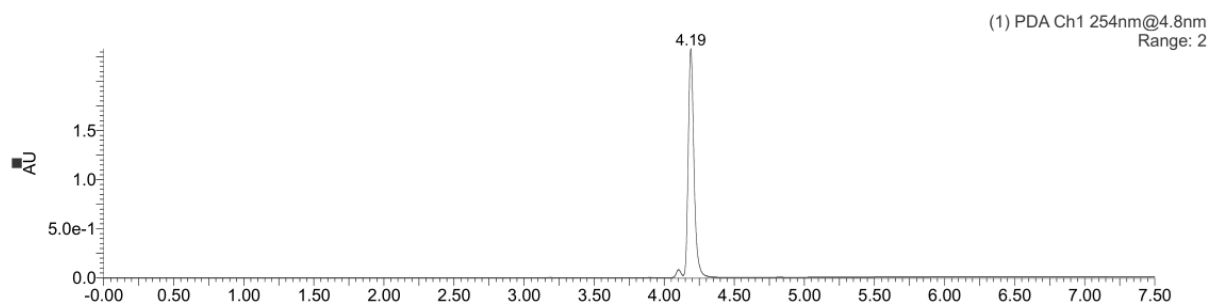

**Figure S106.** HPLC chromatogram of compound **22**.

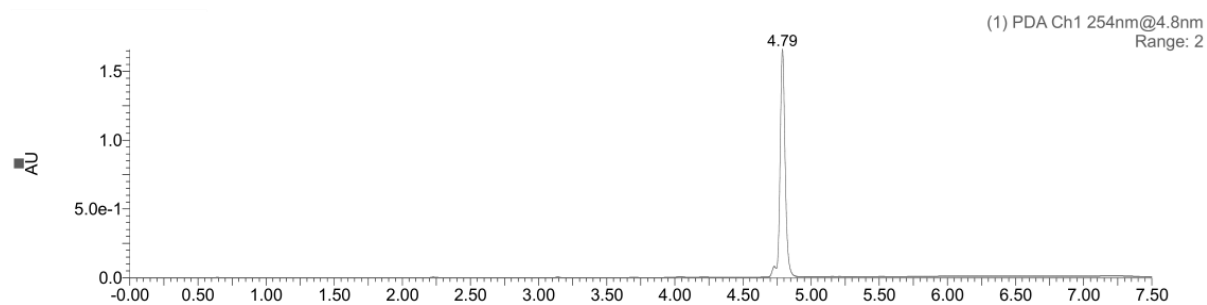

**Figure S107.** HPLC chromatogram of compound **23**.

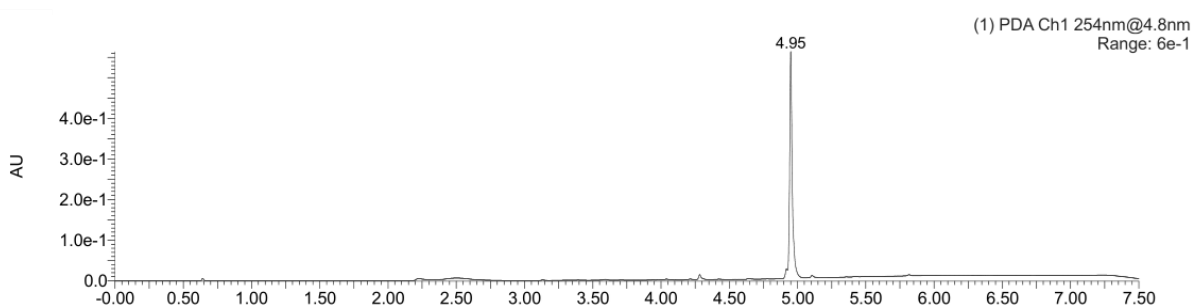

**Figure S108.** HPLC chromatogram of compound **24**.

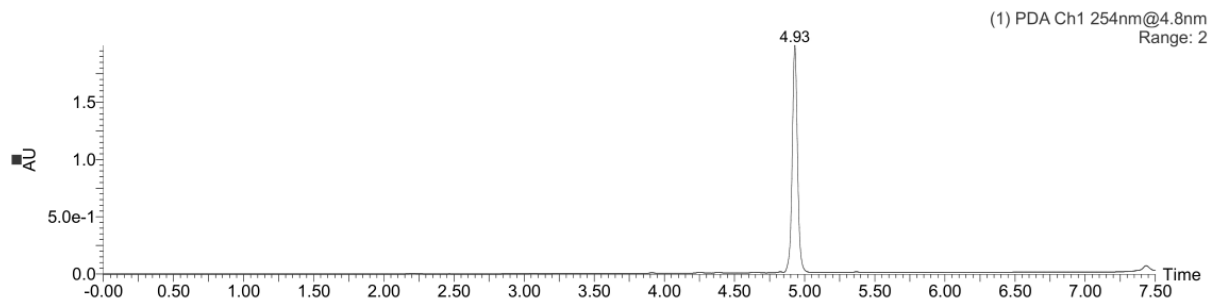

**Figure S109.** HPLC chromatogram of compound **25**.

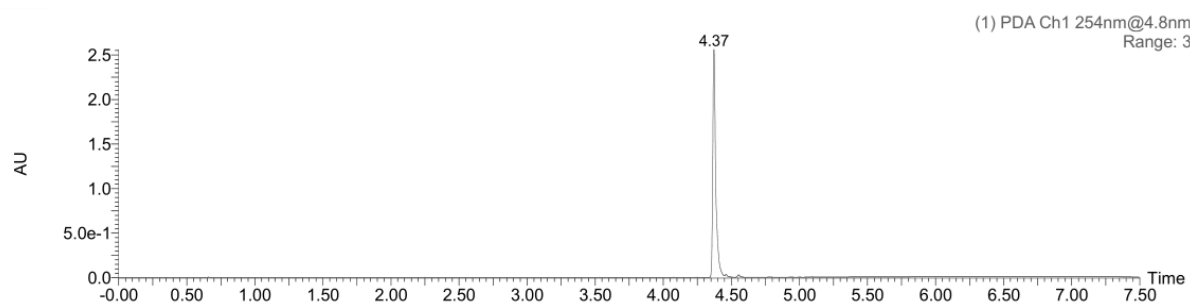

**Figure S110.** HPLC chromatogram of compound **26**.

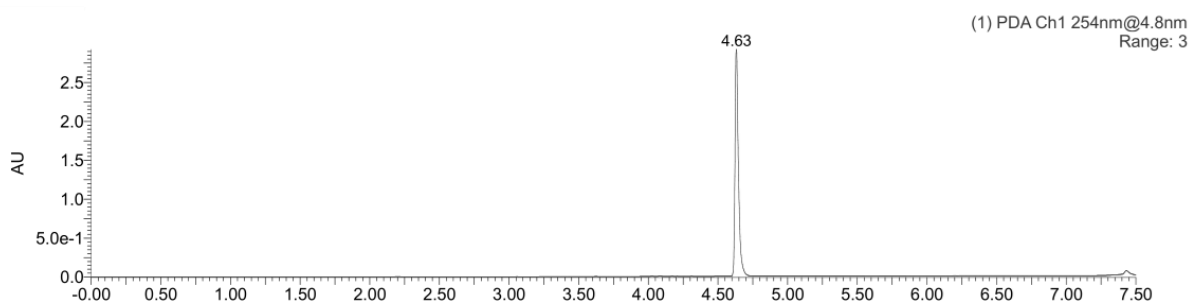

**Figure S111.** HPLC chromatogram of compound **27**.

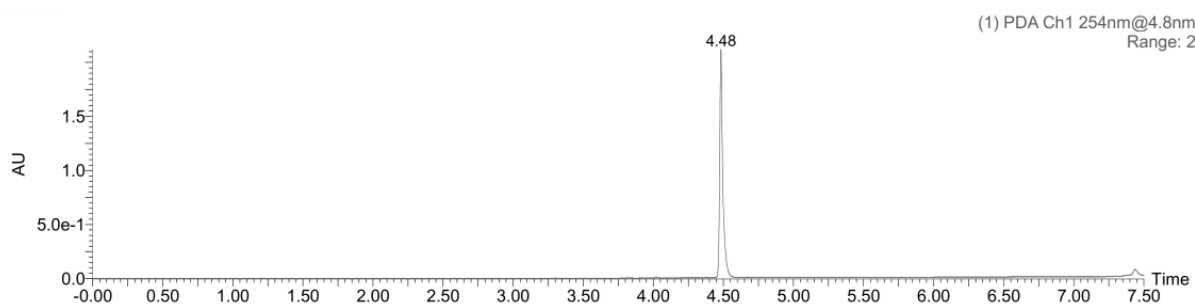

**Figure S112.** HPLC chromatogram of compound **28**.

## Original images for Western blots in Figure 5

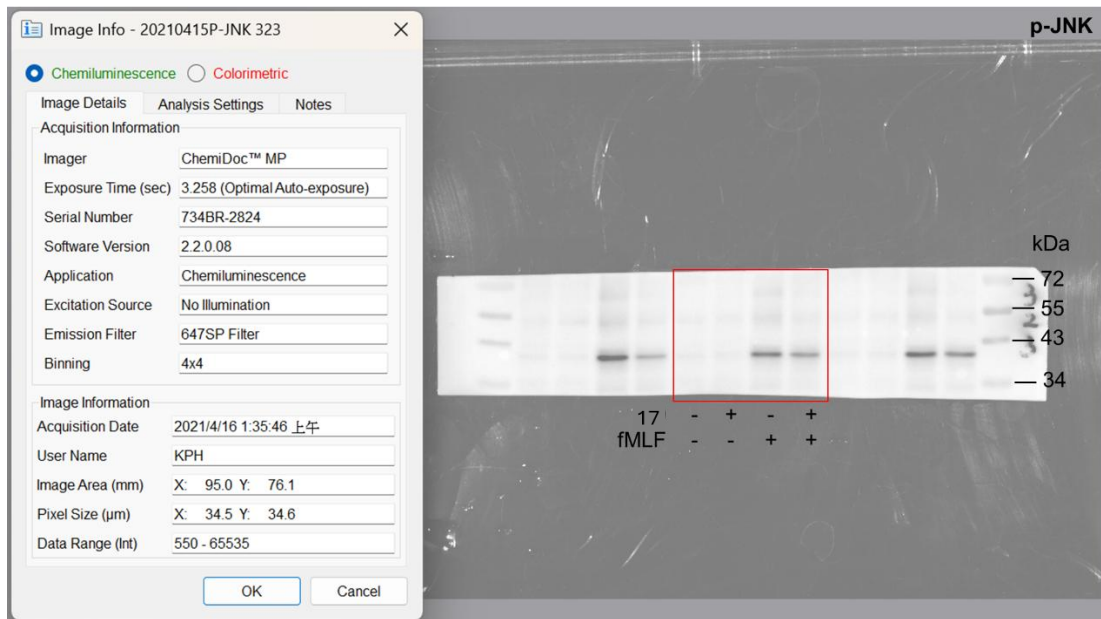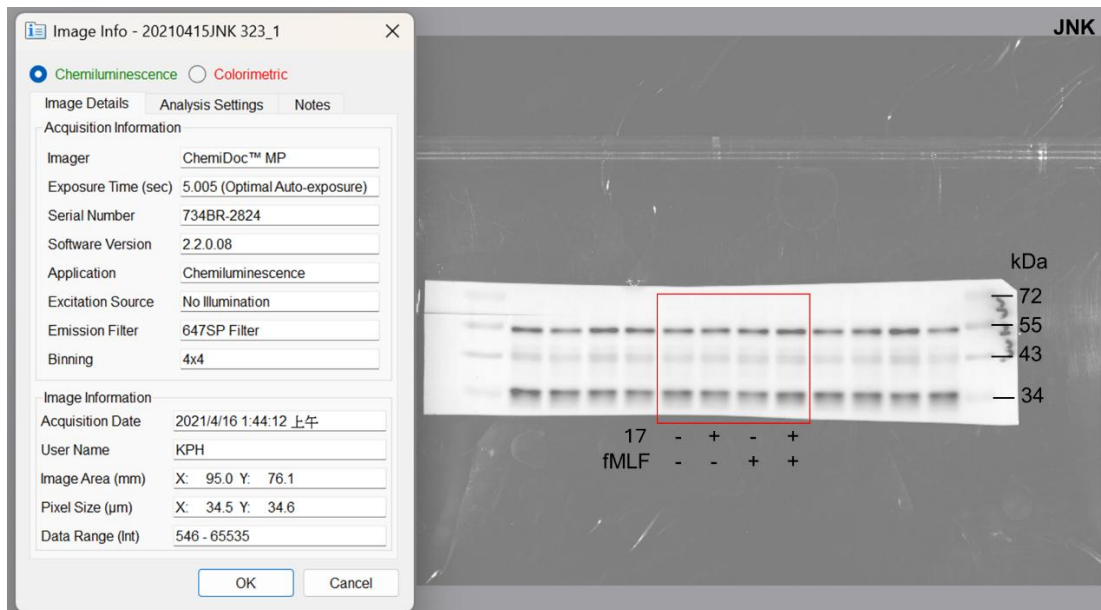

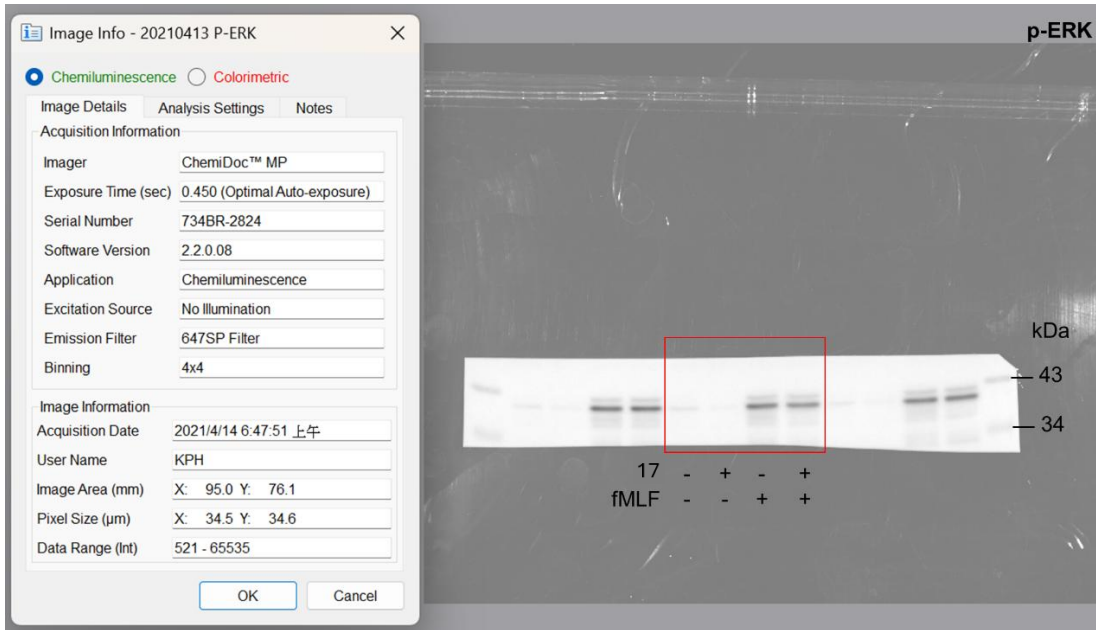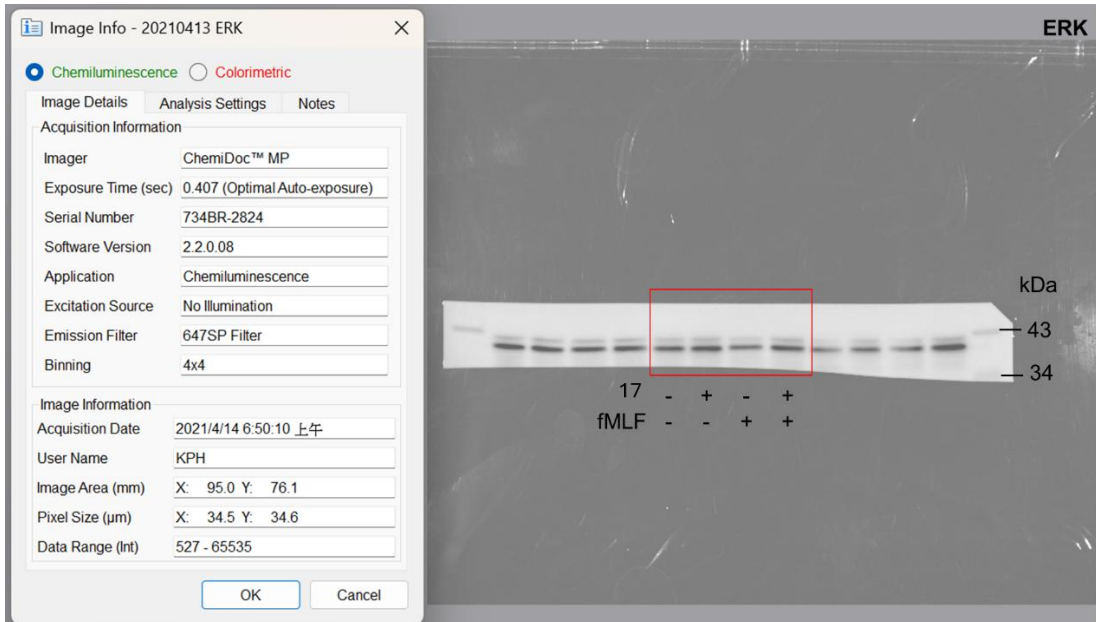

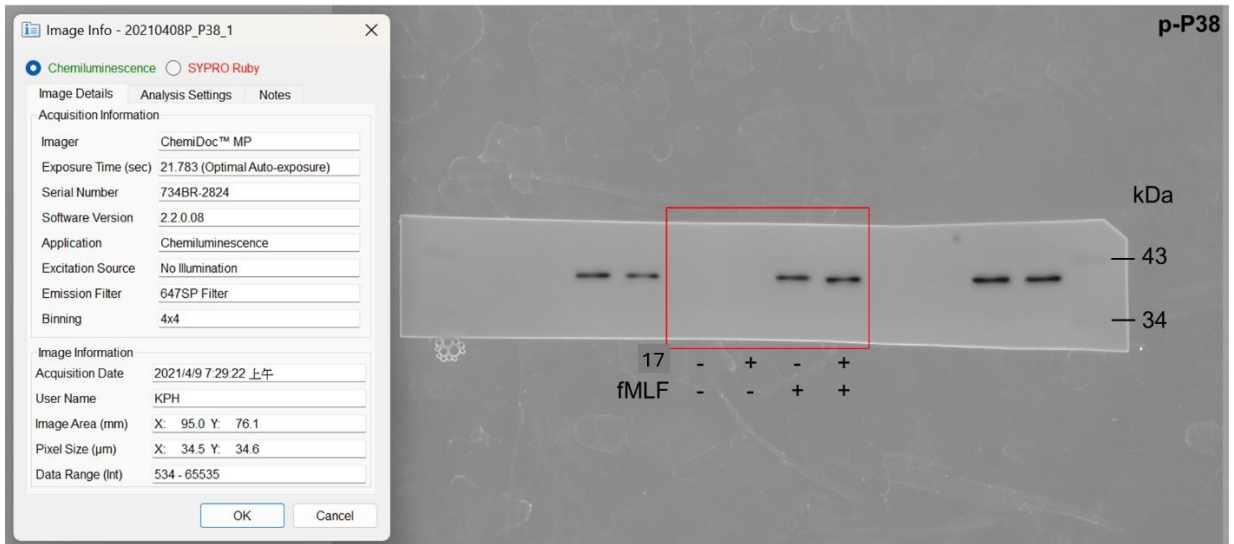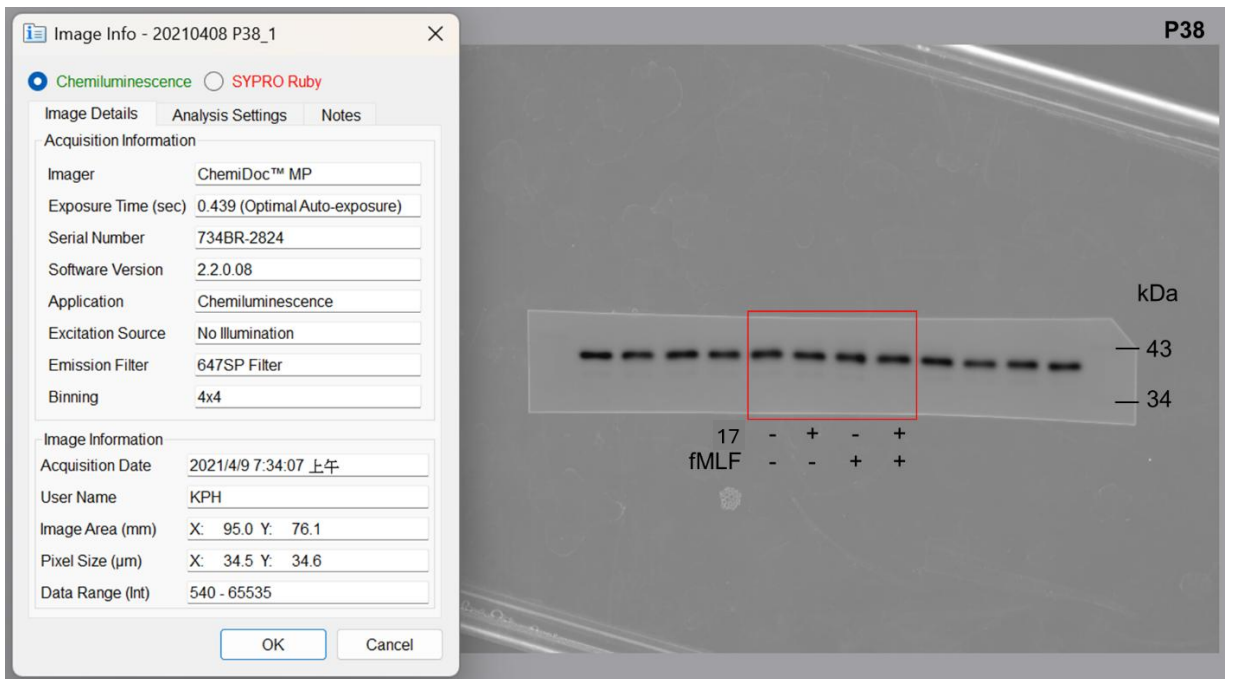

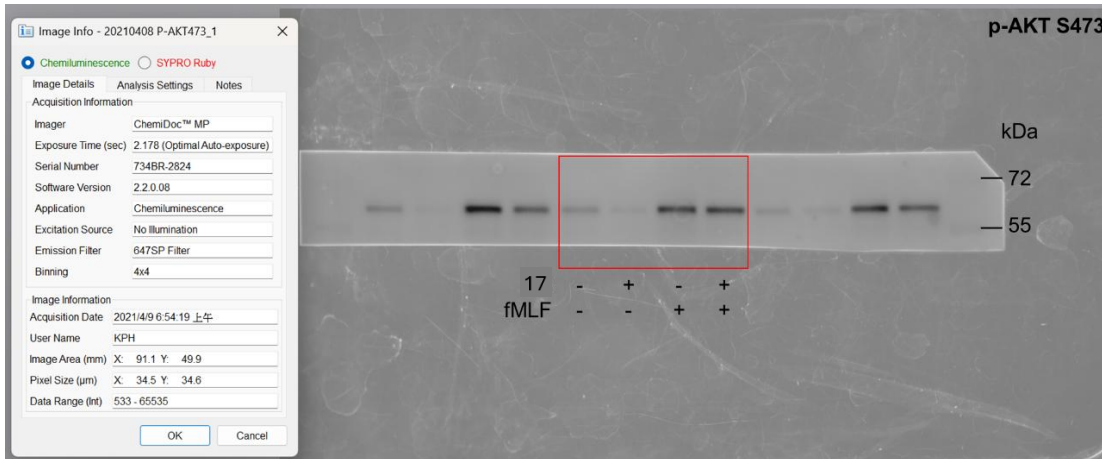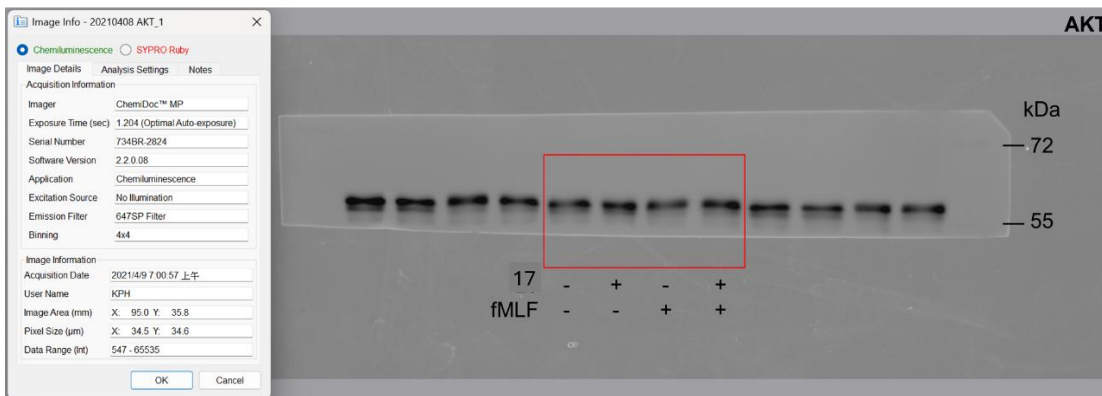

## Original images for Western blots in Figure 6

p-FAK Y397

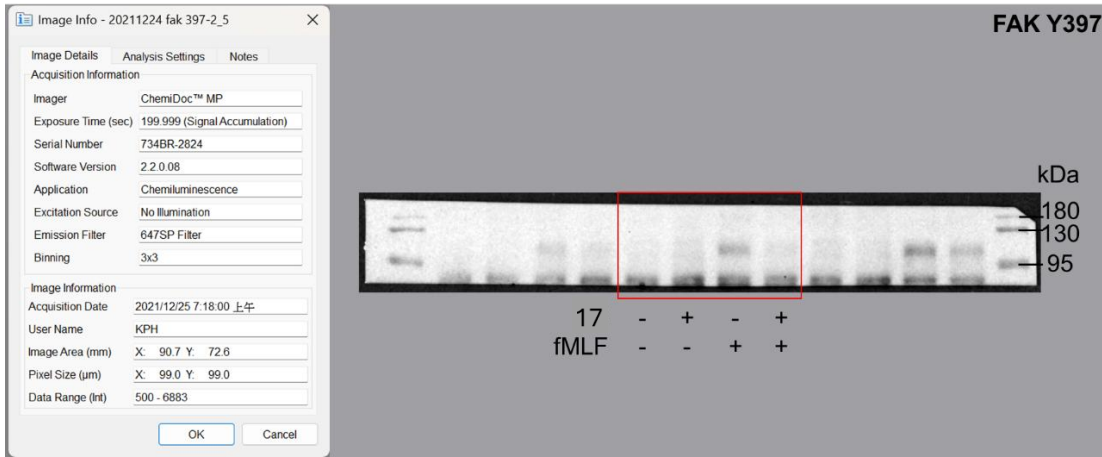

FAK for p-FAK Y397

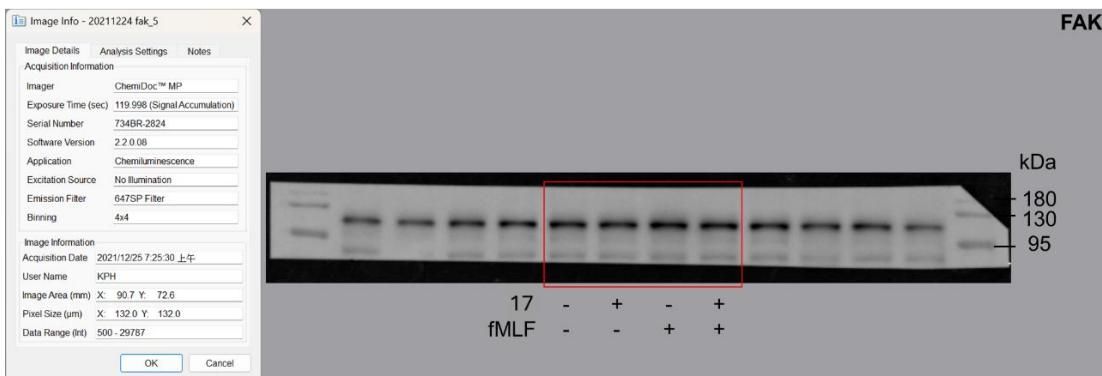

## p-FAK Y576

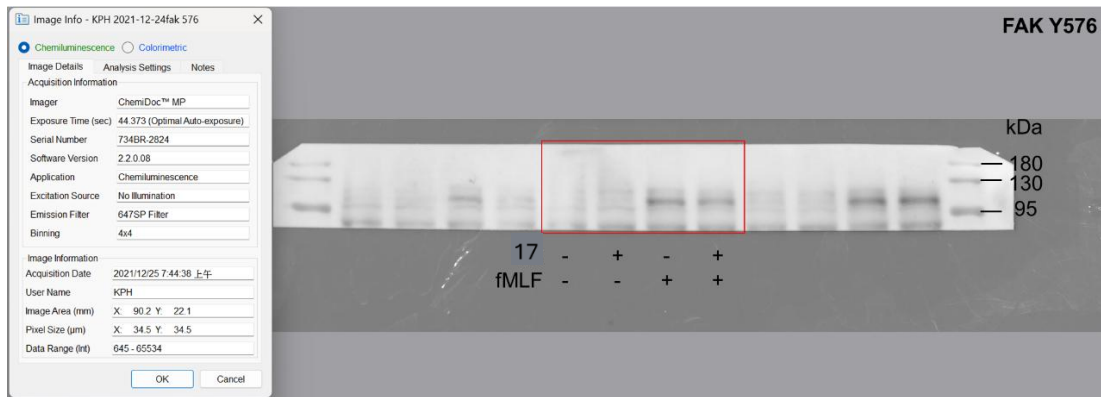

## FAK for p-FAK Y576

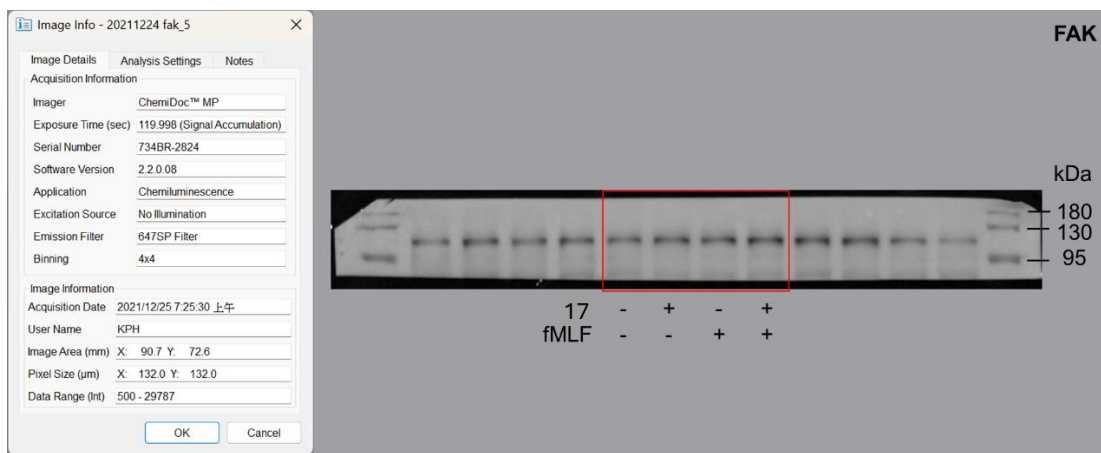

## p-FAK Y925

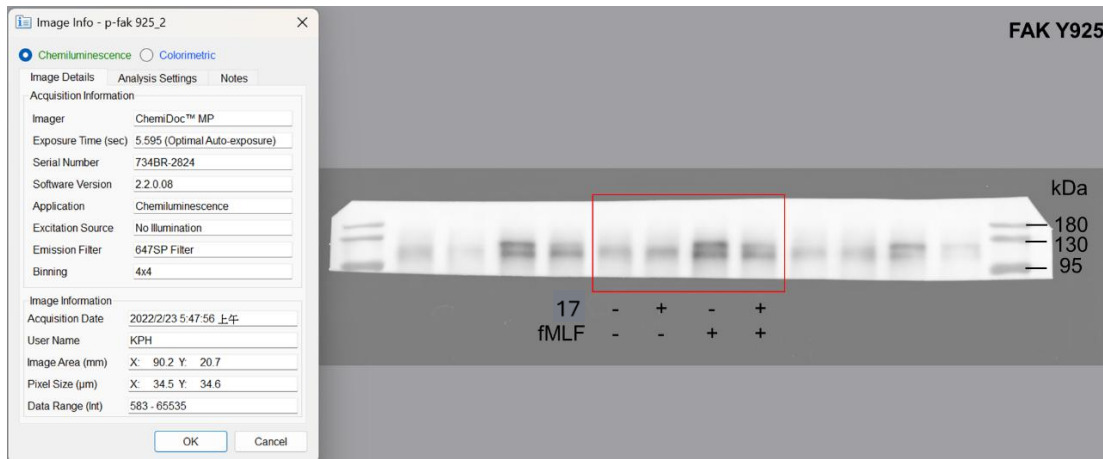

## FAK for p-FAK Y925

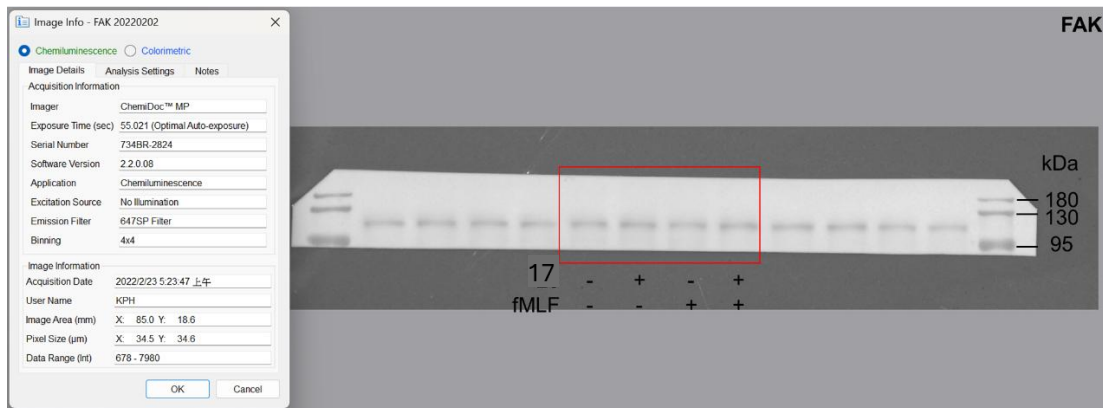

## p-Pax Y31

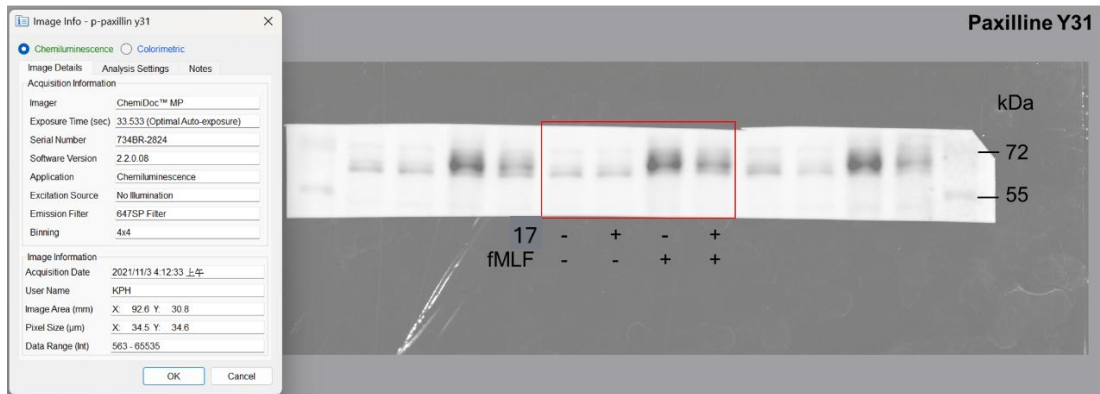

## Pax for p-Pax Y31

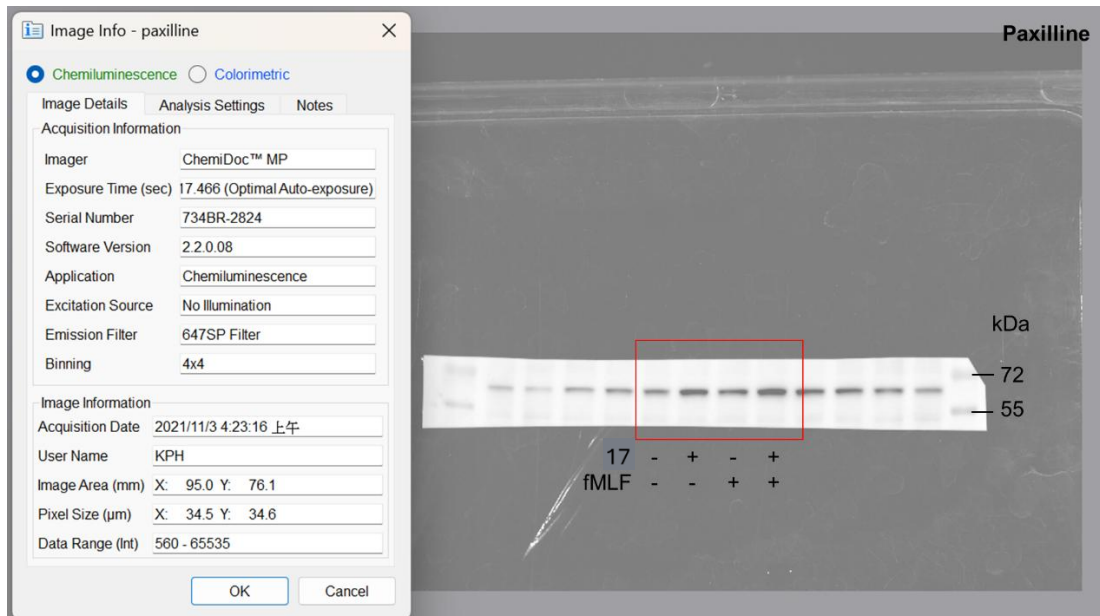

## p-Pax Y118

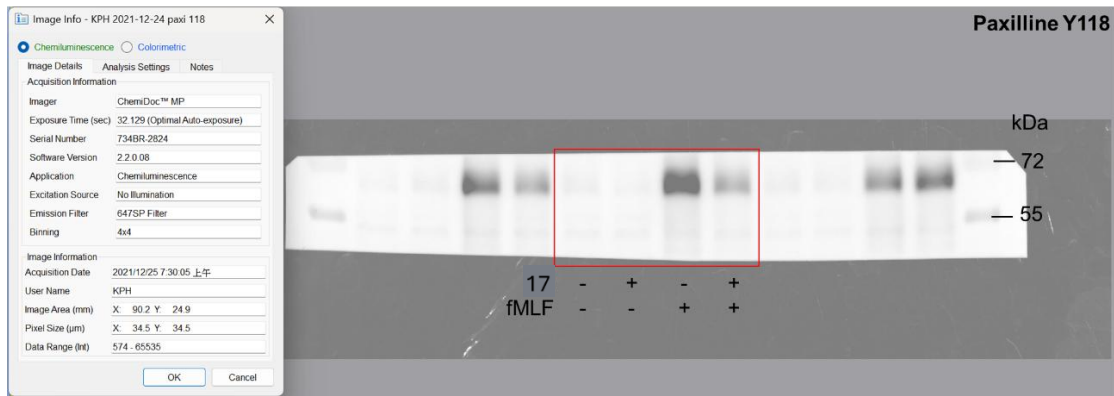

## Pax for p-Pax Y118

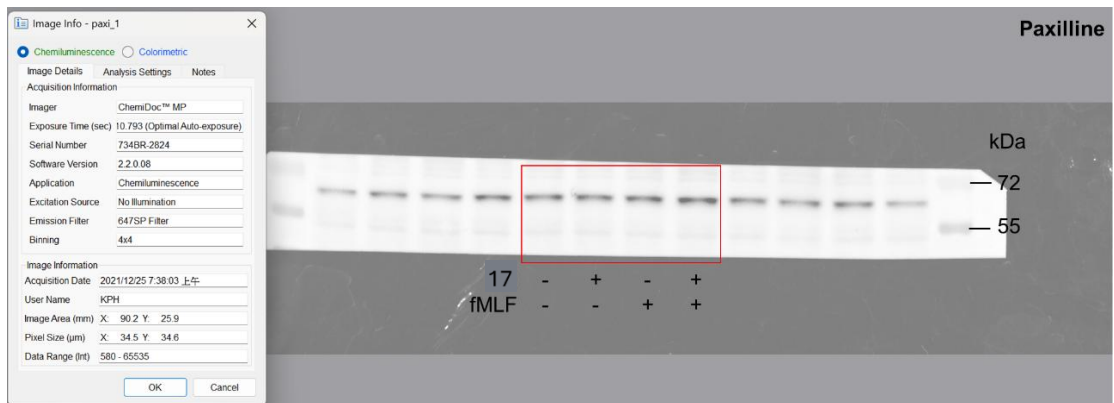

Supplement: d6ra01300g1.pdf [file d6ra01300g1.pdf]
